# Supplementary material for: Oxonitrogenated Derivatives of Eremophilans and Eudesmans: Antiproliferative and Anti-Trypanosoma cruzi Activity
Source: MDPI journal article supplement (doi:10.3390/molecules27103067), 2022-05-10
Supplement: s1 [file s1]

# Oxonitrogenated Derivatives of Eremophilans and Eudesmans: Antiproliferative and Anti-*Trypanosoma cruzi* Activity

## Table of contents

|    |                                                                                                 |                |
|----|-------------------------------------------------------------------------------------------------|----------------|
| 1. | NMR spectra of natural sesquiterpene, tessaric acid (1), ilicic acid (2) and ilicic alcohol (3) | Pages S2–S4    |
| 2. | NMR spectra of tessaric acid derivatives (4–9)                                                  | Pages S5–S19   |
| 3. | NMR spectra of ilicic acid derivatives (10–15)                                                  | Pages S20–S34. |
| 4. | NMR spectra of ilicic alcohol derivative (16–19)                                                | Pages S35–S44  |
| 5. | HRMS-ES of compounds 1–19                                                                       | Pages S45–S54  |

## 1. NMR spectra of natural sesquiterpene tessaric acid (1), ilicic acid (2) and ilicic alcohol (3)

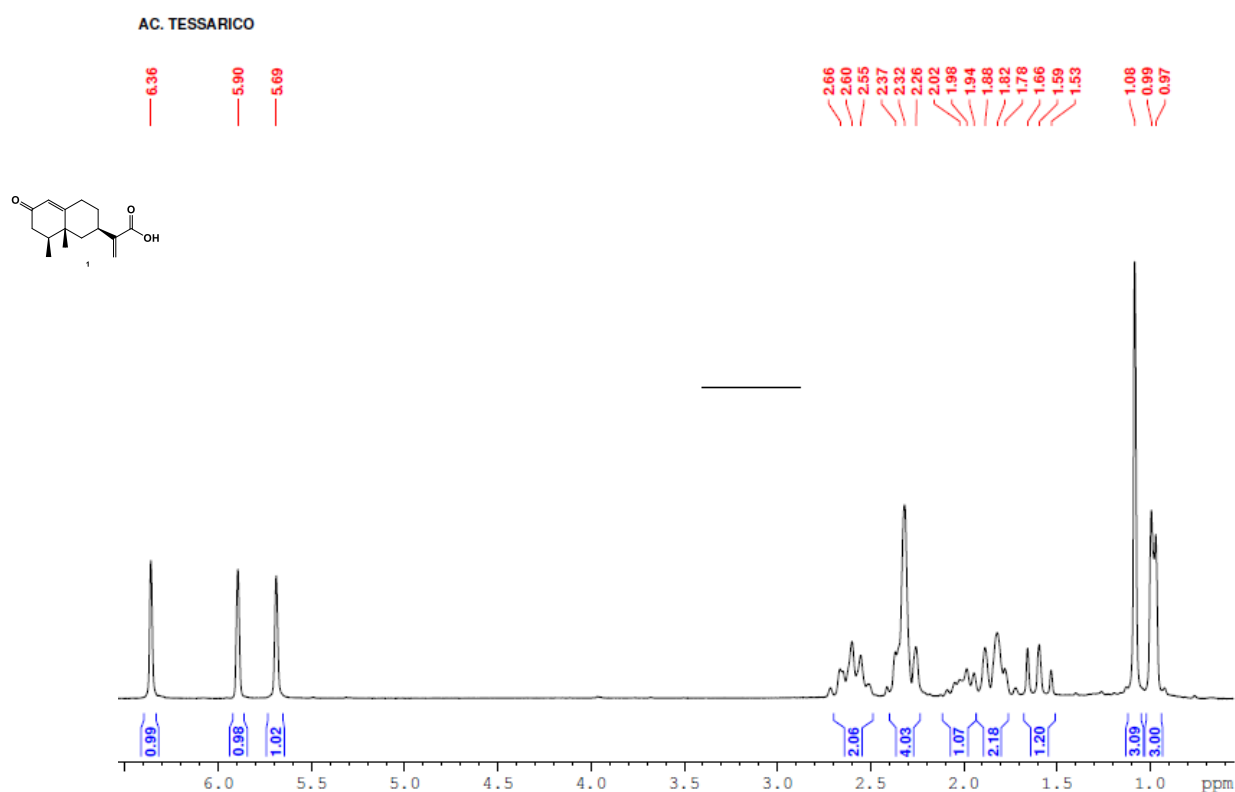

Figure S1. <sup>1</sup>H-NMR of 1.

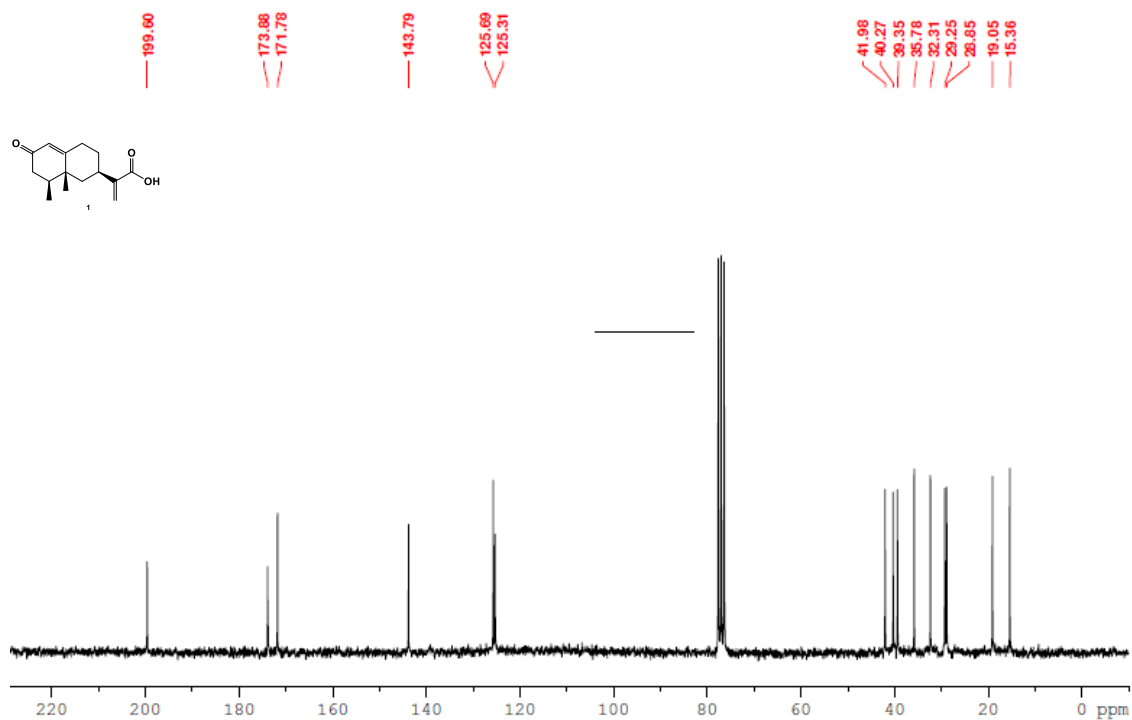

Figure S2.  $^{13}\text{C}$ -NMR of 1.

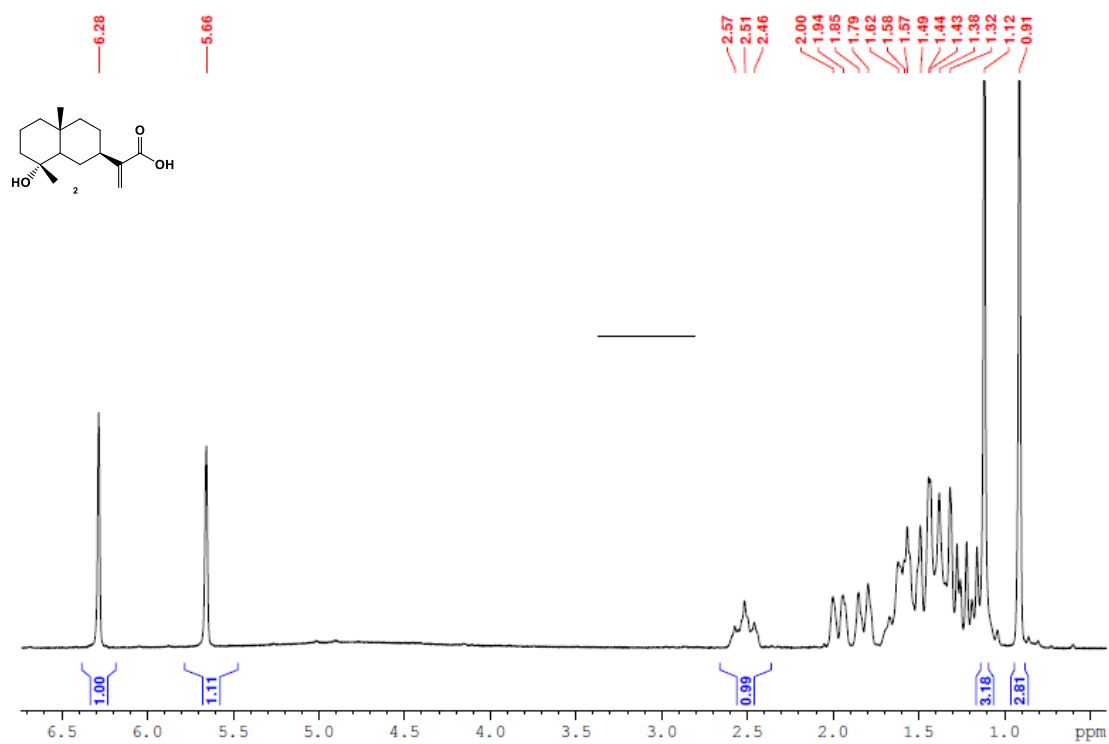

Figure S3.  $^1\text{H}$ -NMR of 2.

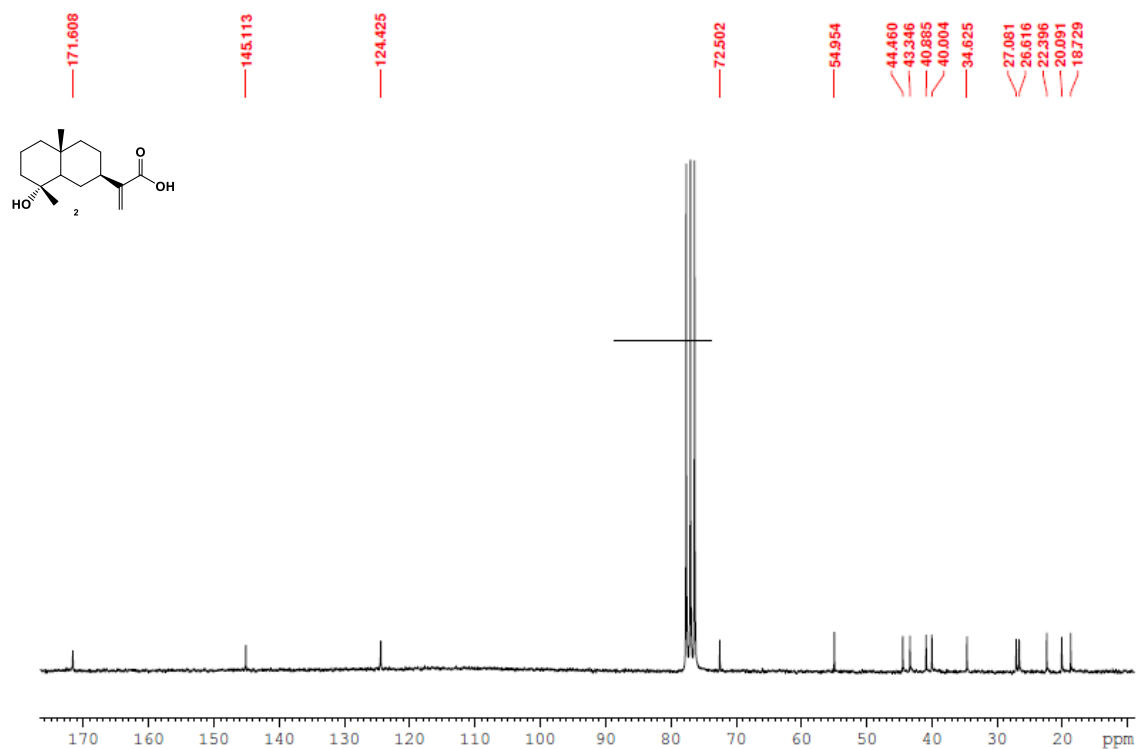

Figure S4. <sup>13</sup>C-NMR of 2.

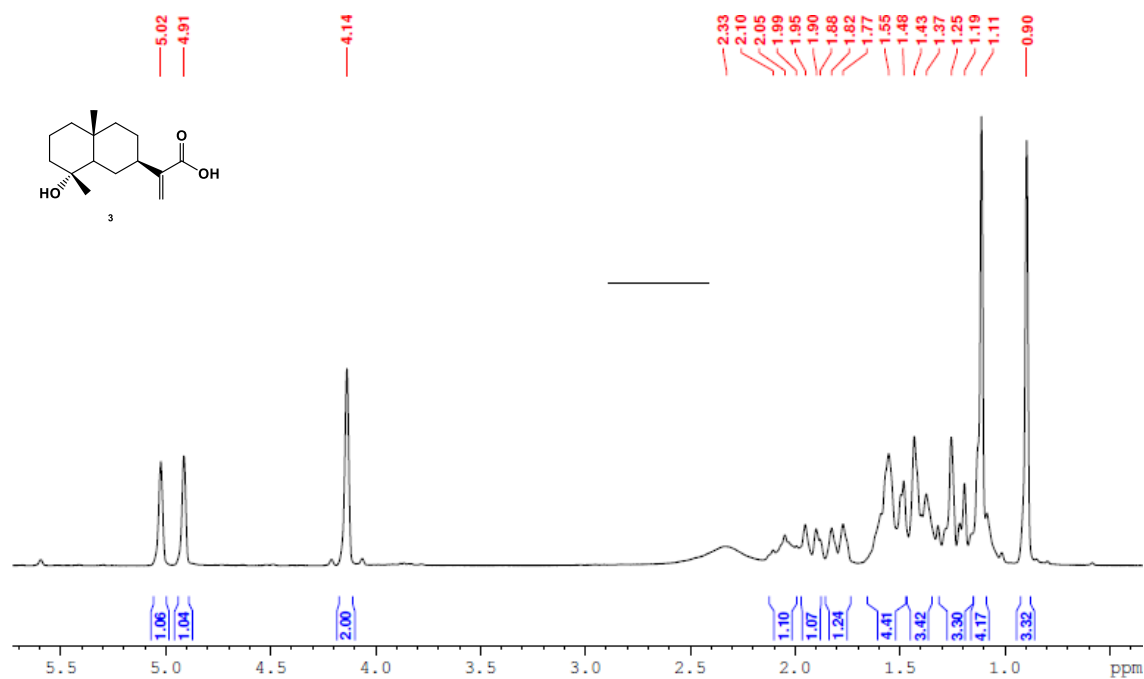

Figure S5. <sup>1</sup>H-NMR of 3.

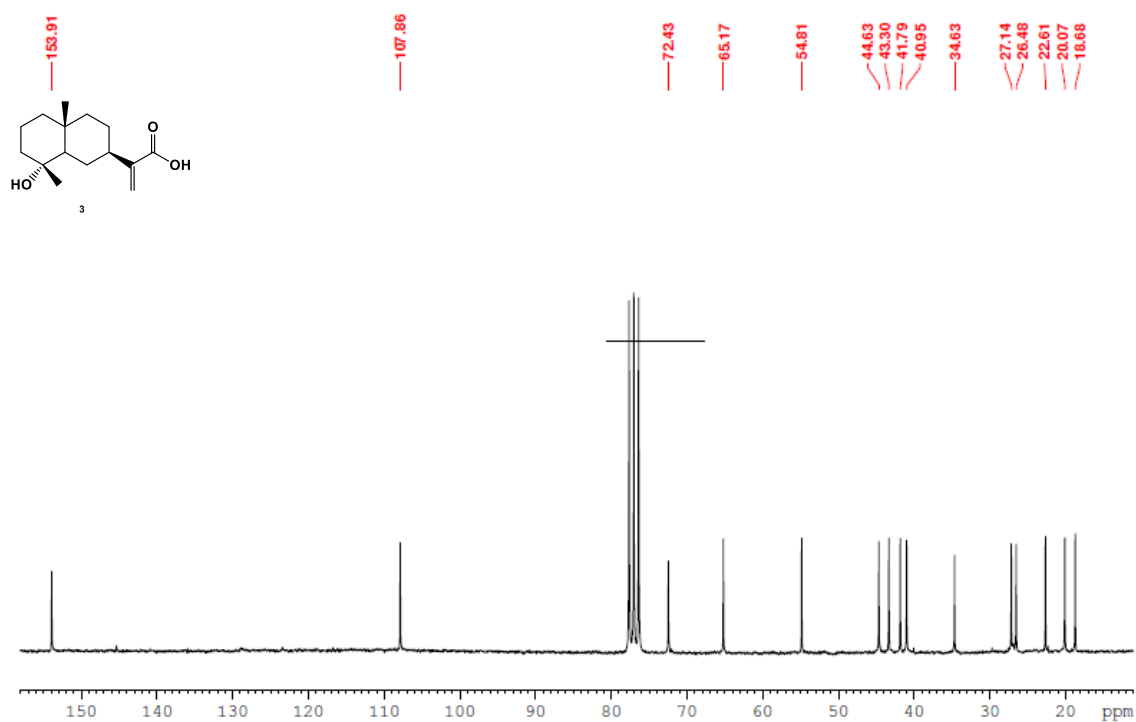

Figure S6.  $^{13}\text{C}$ -NMR of 3.

## 2. NMR spectra of tessaric acid derivatives

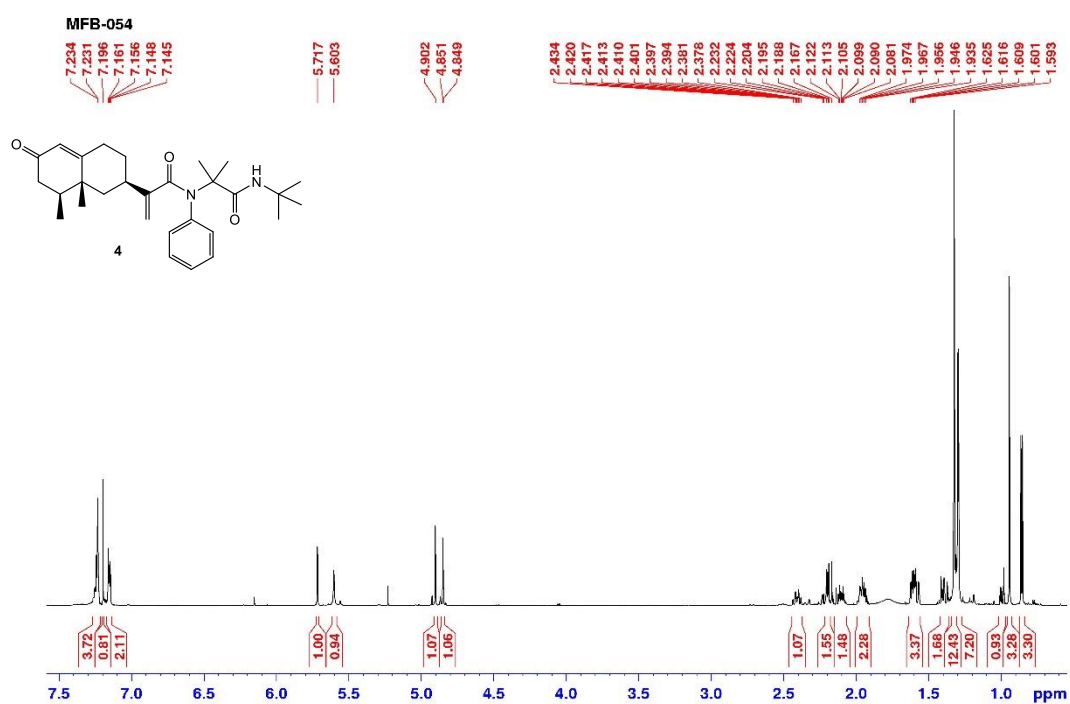

Figure S7.  $^1\text{H}$ -NMR of 4.

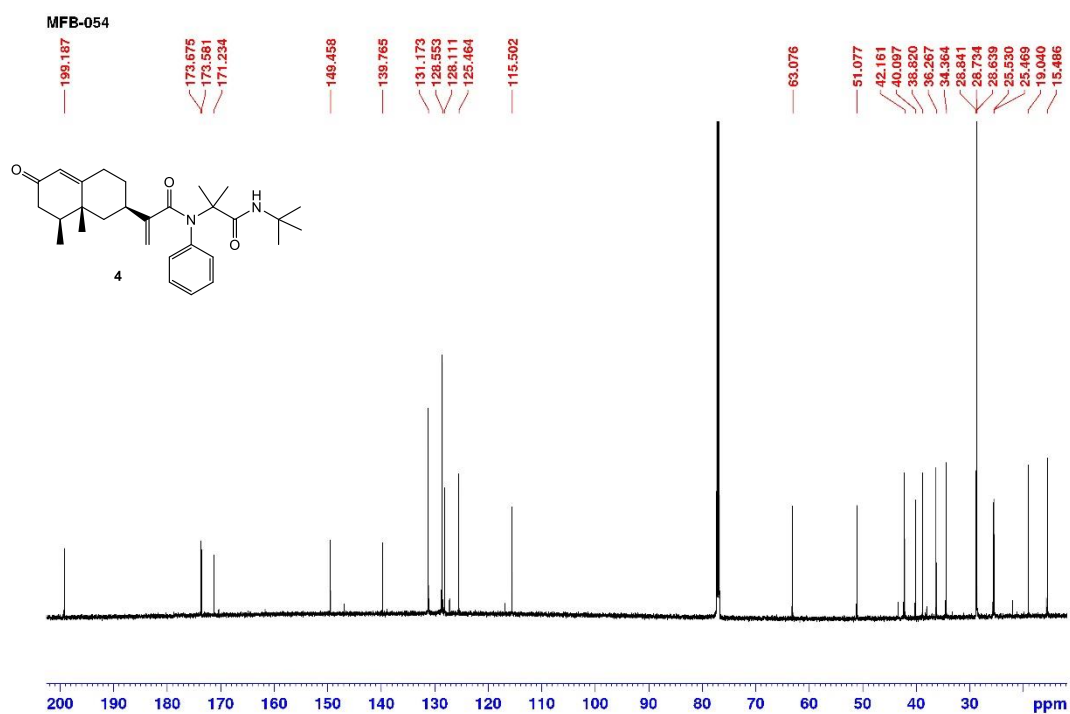

Figure S8. <sup>13</sup>C-NMR of 4.

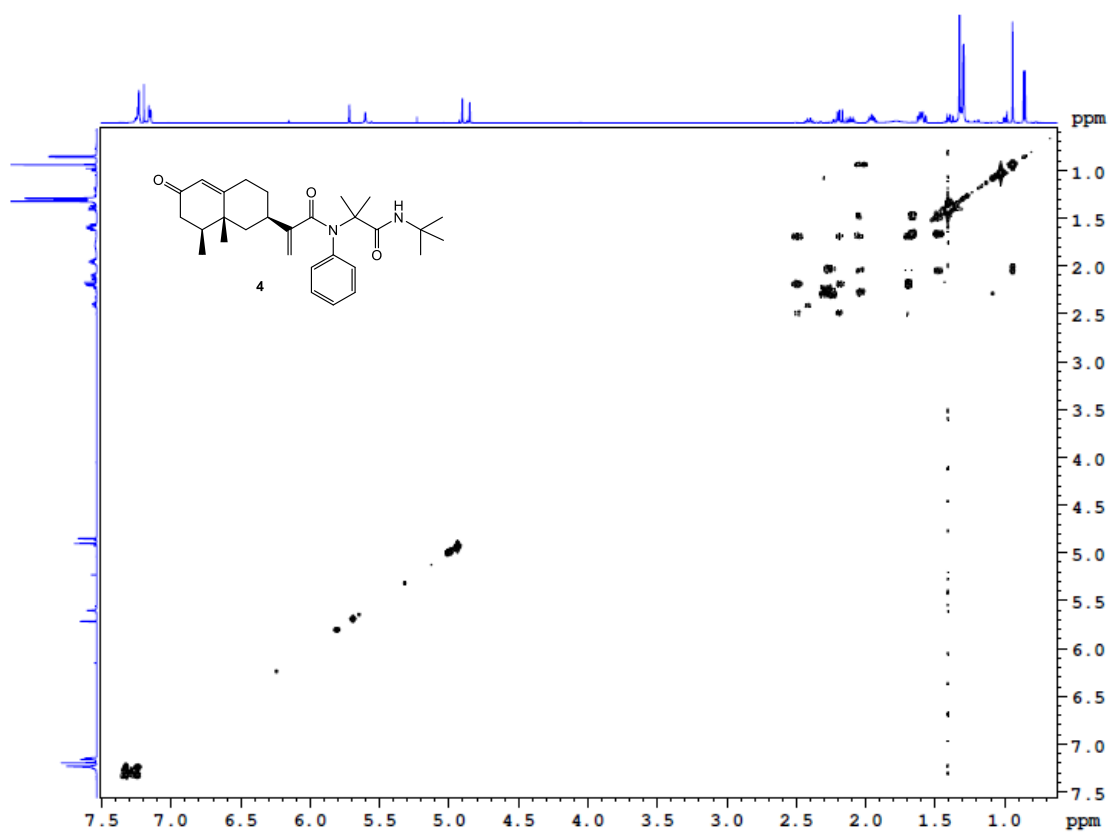

Figure S9. COSY of 4.

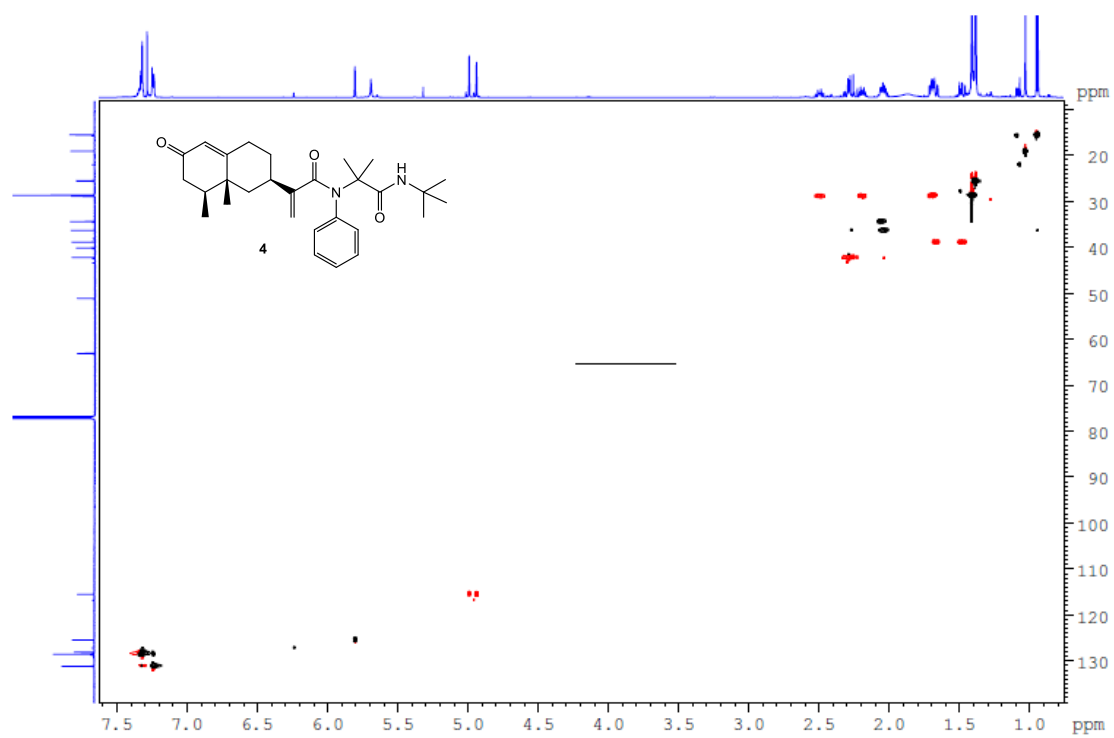

Figure S10. HSQC of 4.

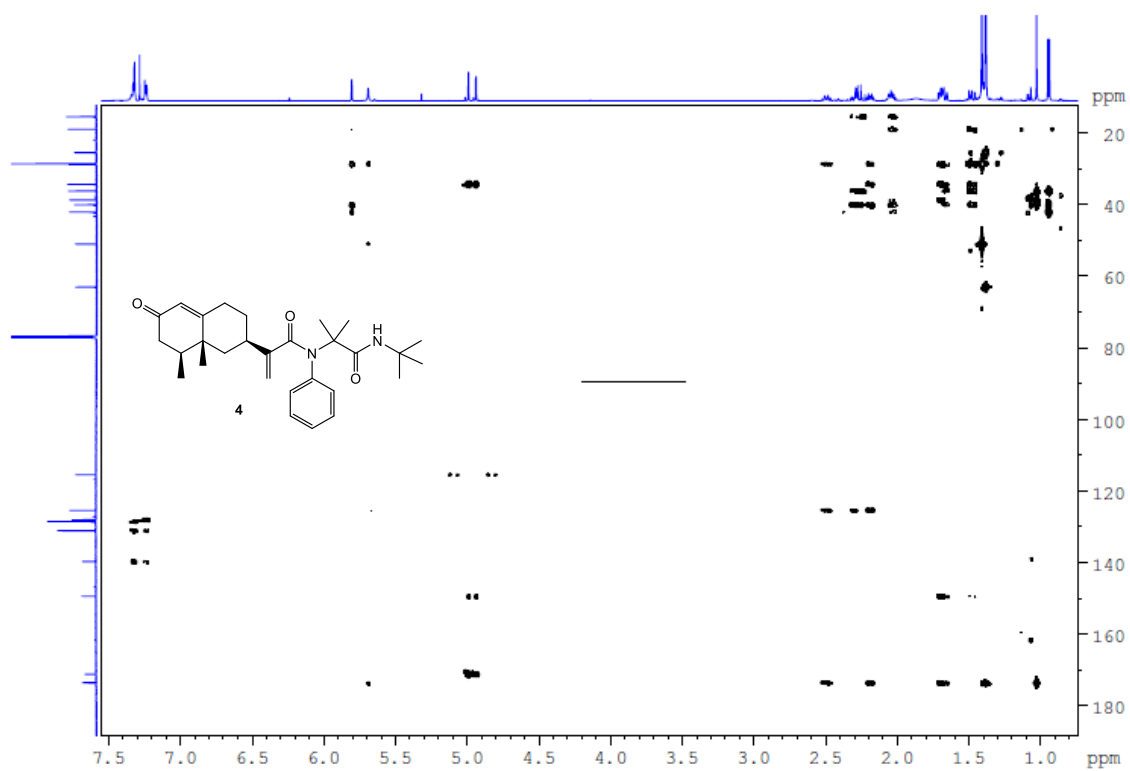

Figure S11. HMBC of 4.

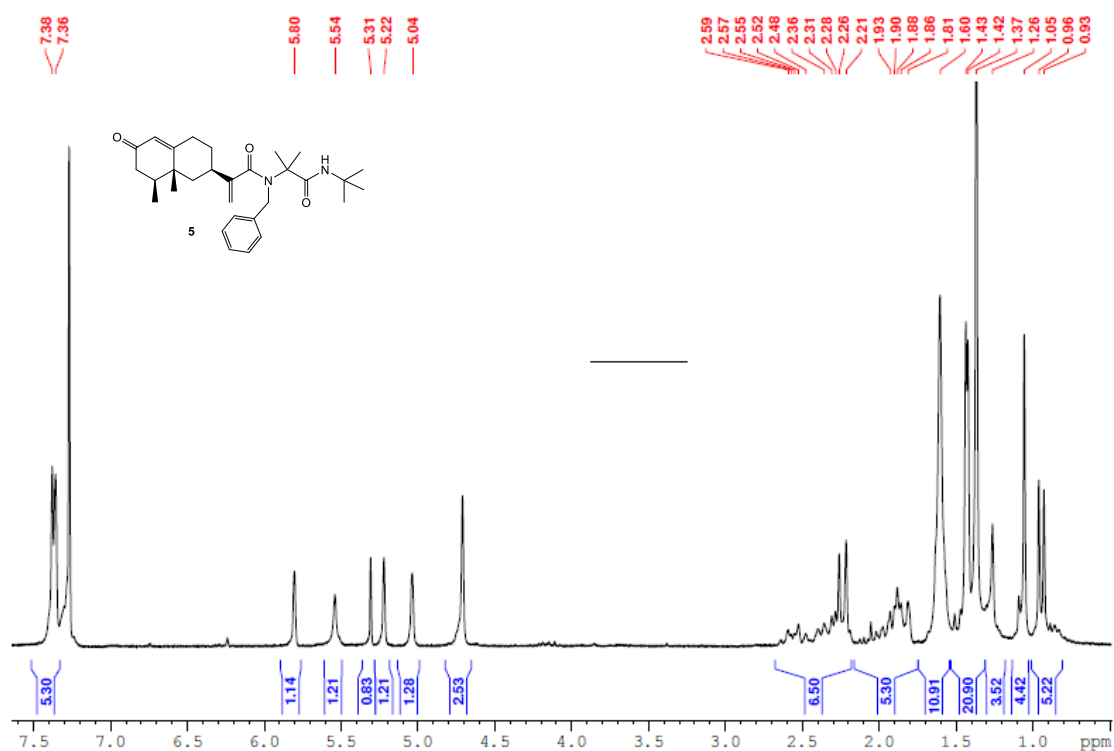

Figure S12. <sup>1</sup>H-NMR of 5.

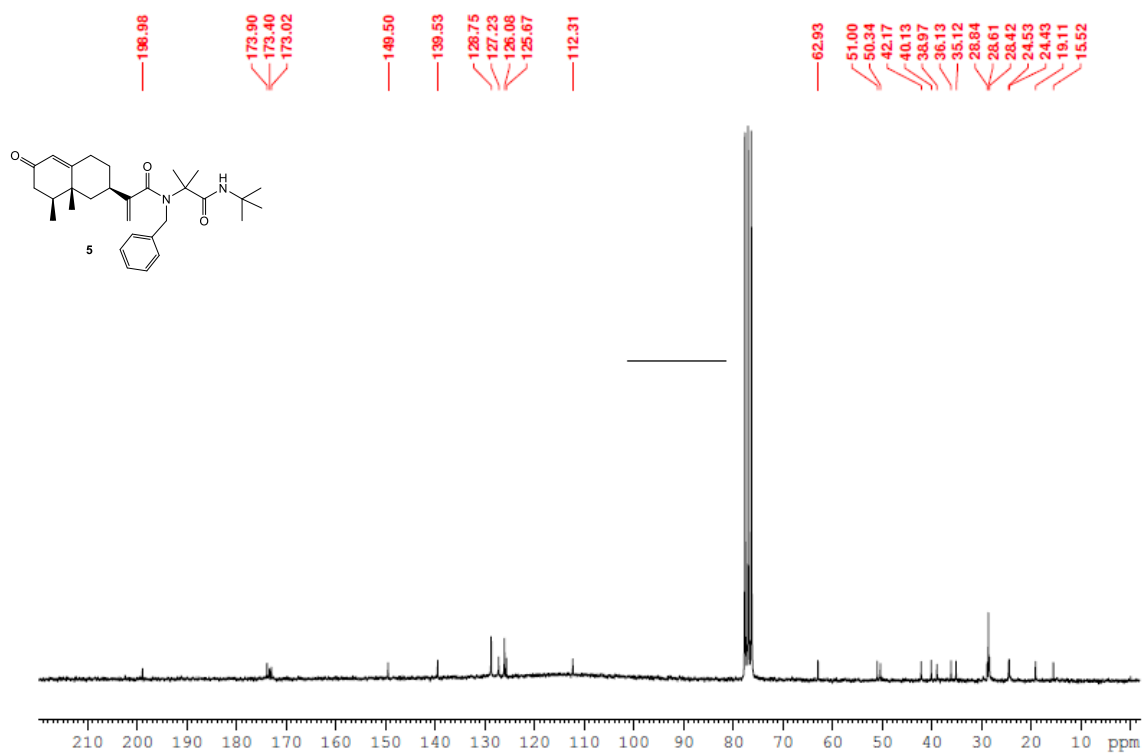

Figure S13. <sup>13</sup>C-NMR of 5.

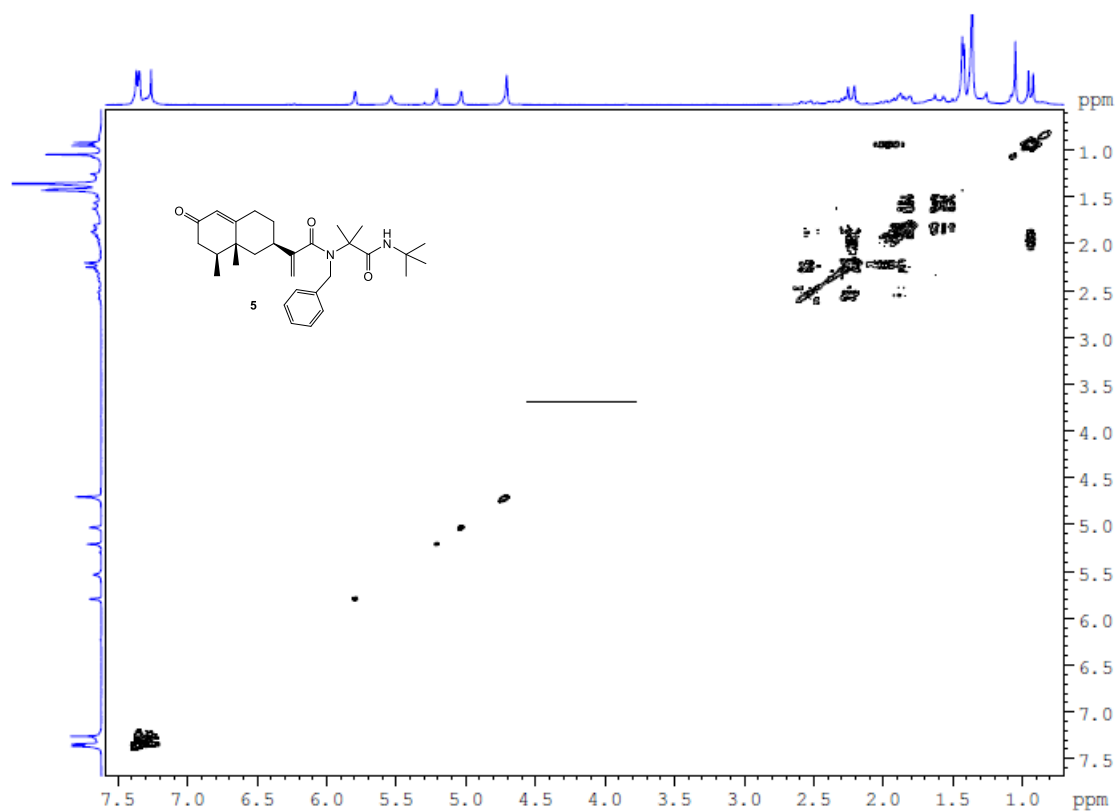

Figure S14. COSY of 5.

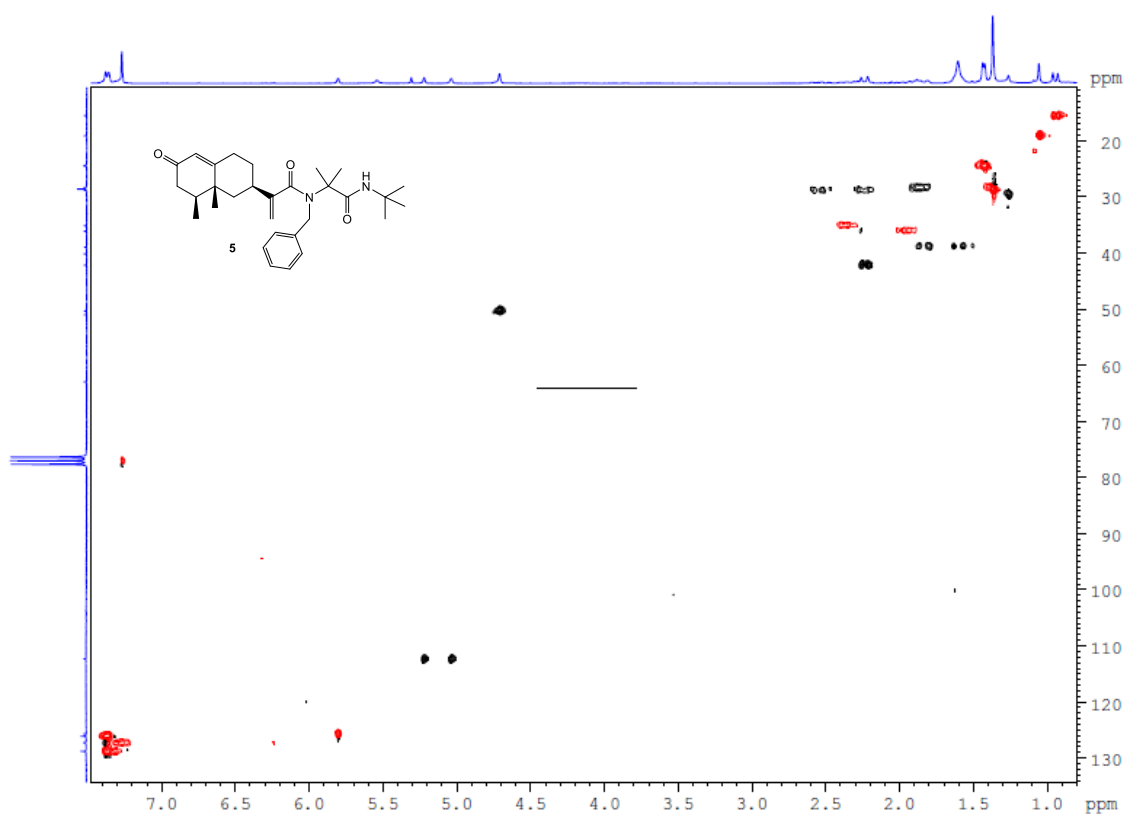

Figure S15. HSQC of 5.



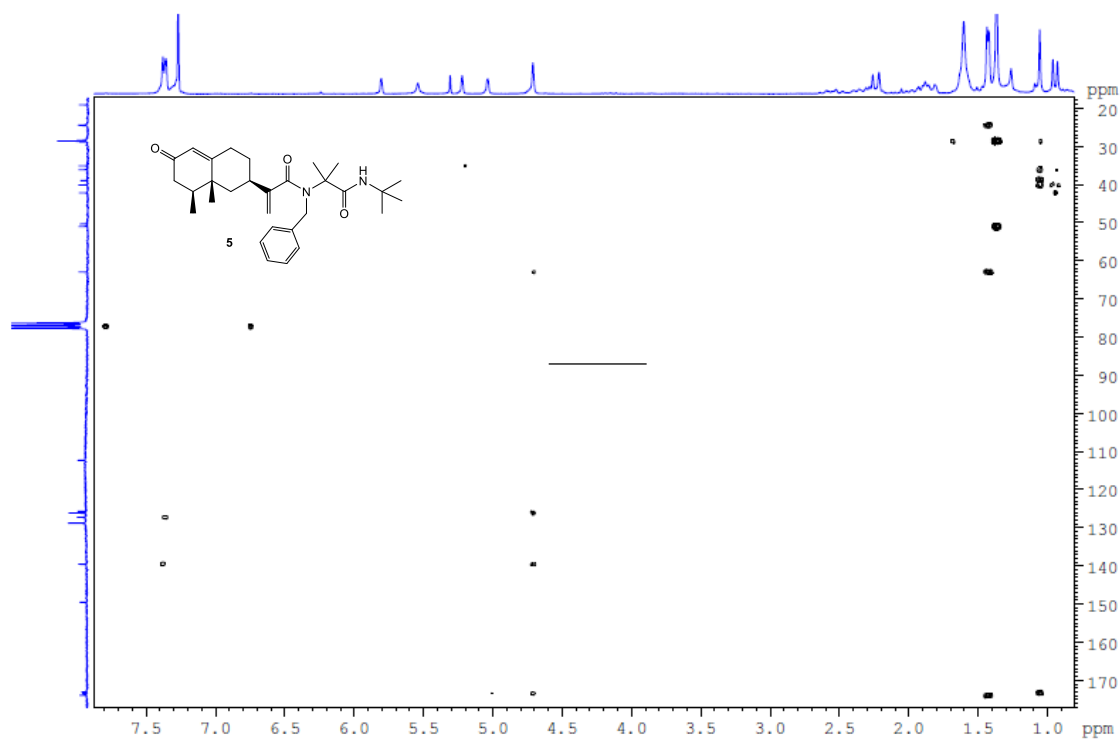

Figure S16. HMBC of 5.

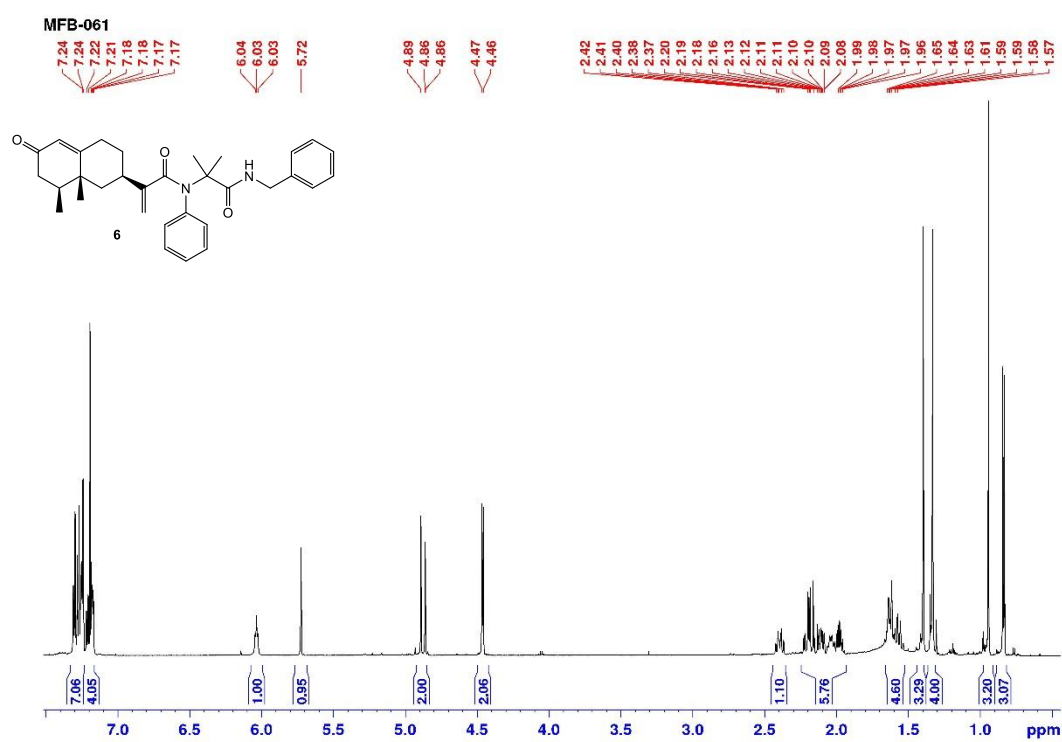

Figure S17.  $^1\text{H}$ -NMR of 6.

MFB-061

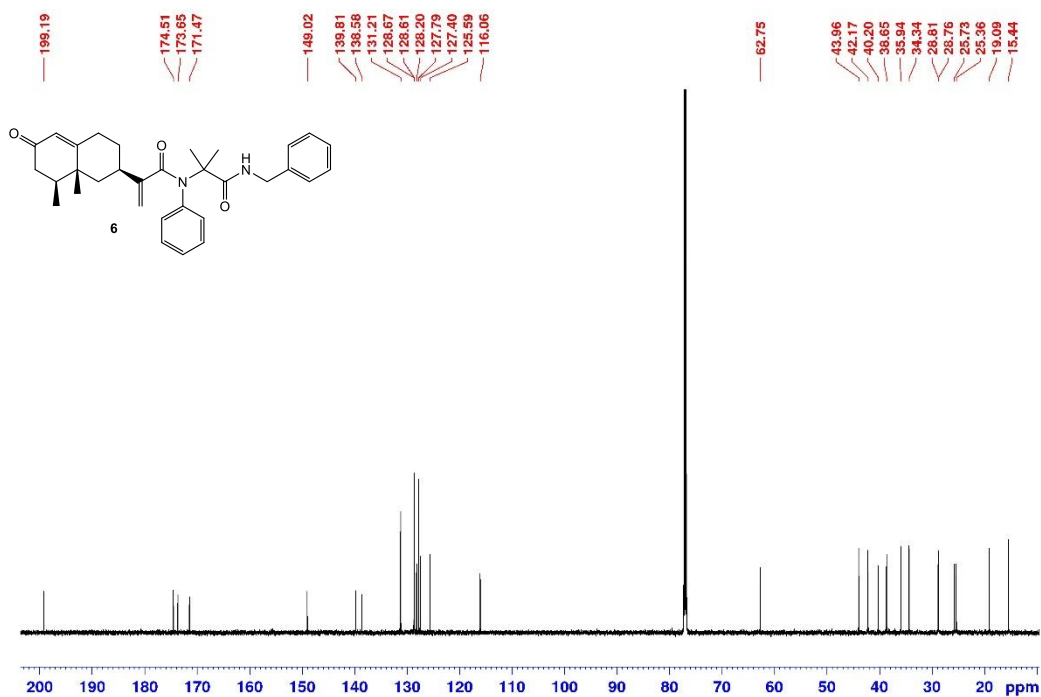

Figure S18.  $^{13}\text{C}$ -NMR of 6.

MFB-061

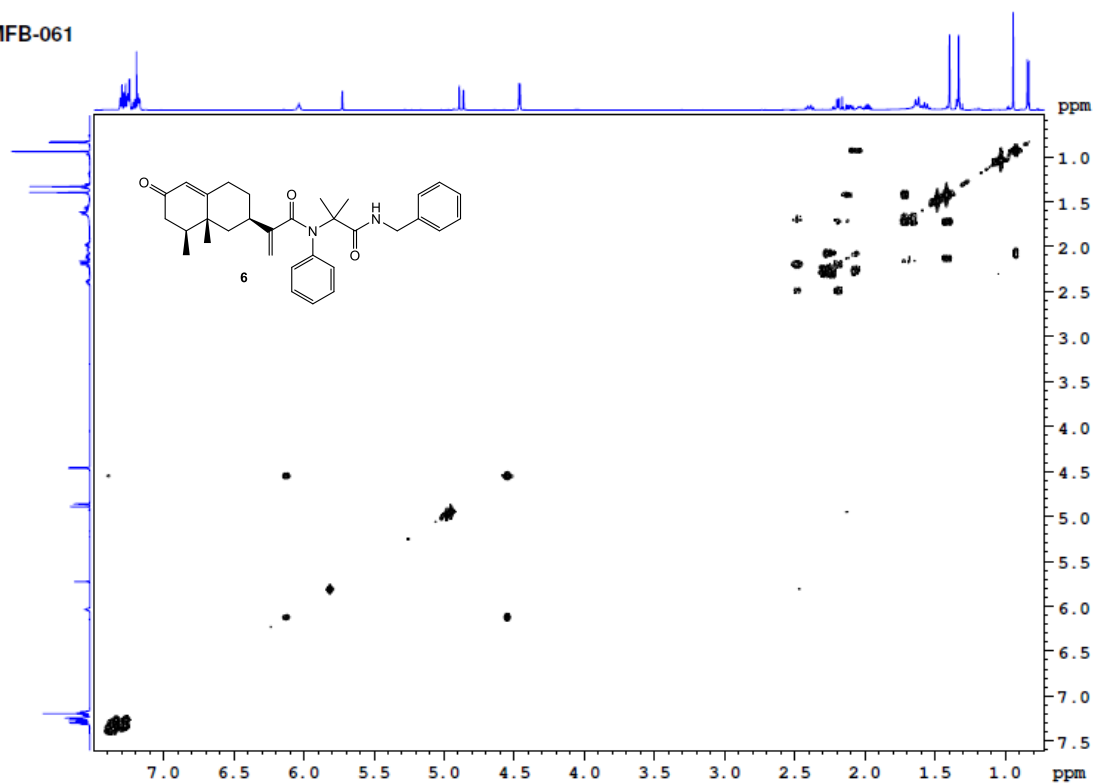

Figure S19. COSY of 6.

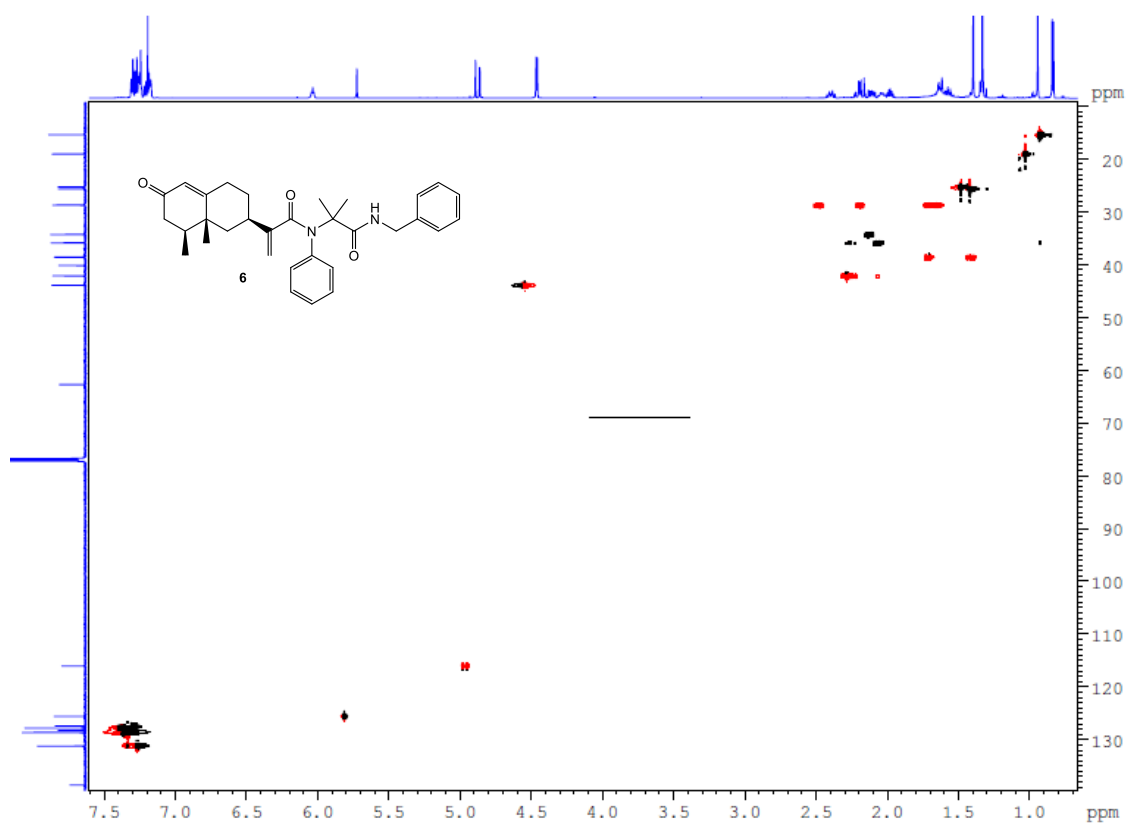

Figure S20. HSQC of 6.

mfb-061

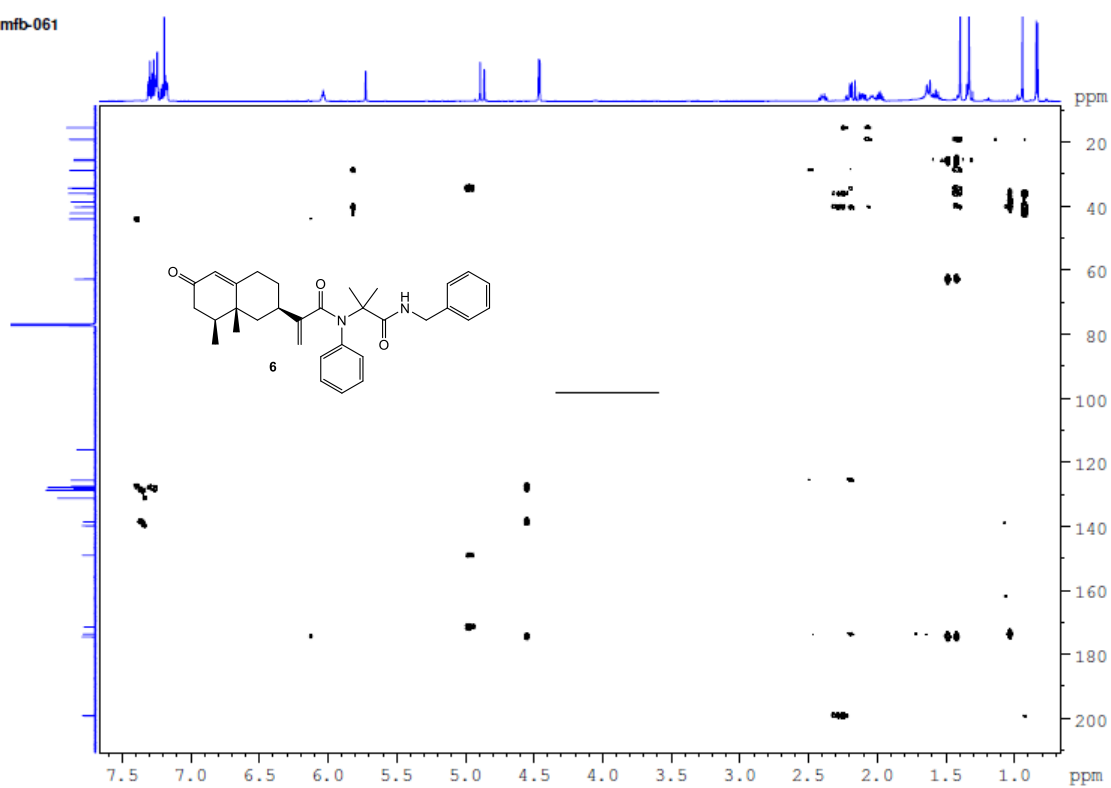

Figure S21. HMBC of 6.

mtb060

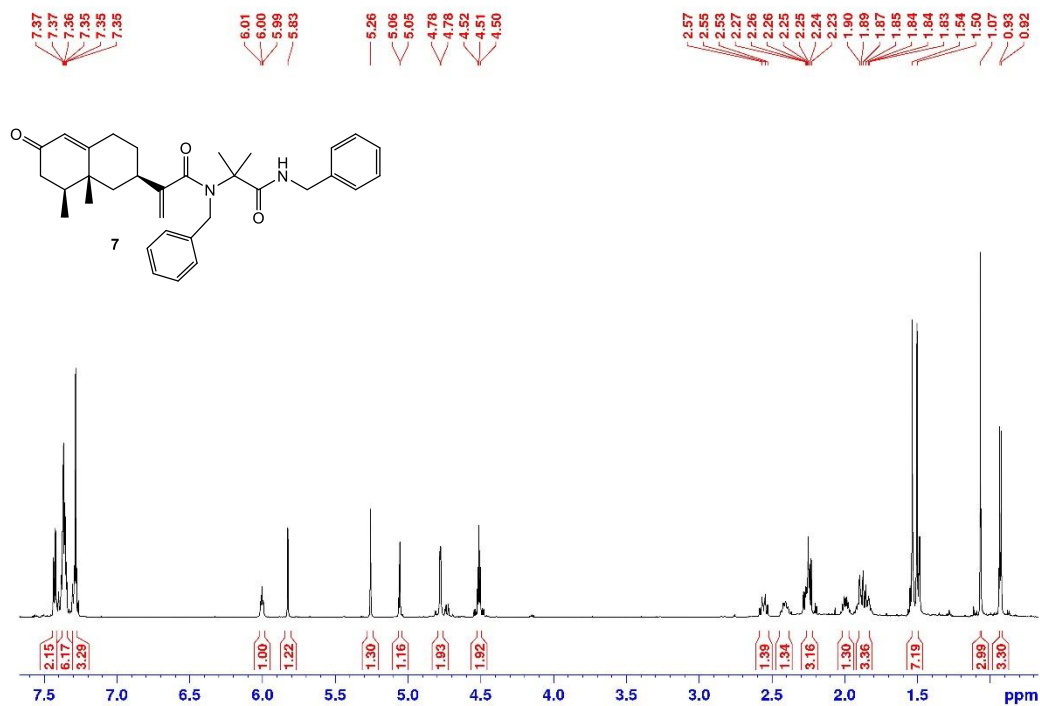

Figure S22. <sup>1</sup>H-NMR of 7.

mtb-060

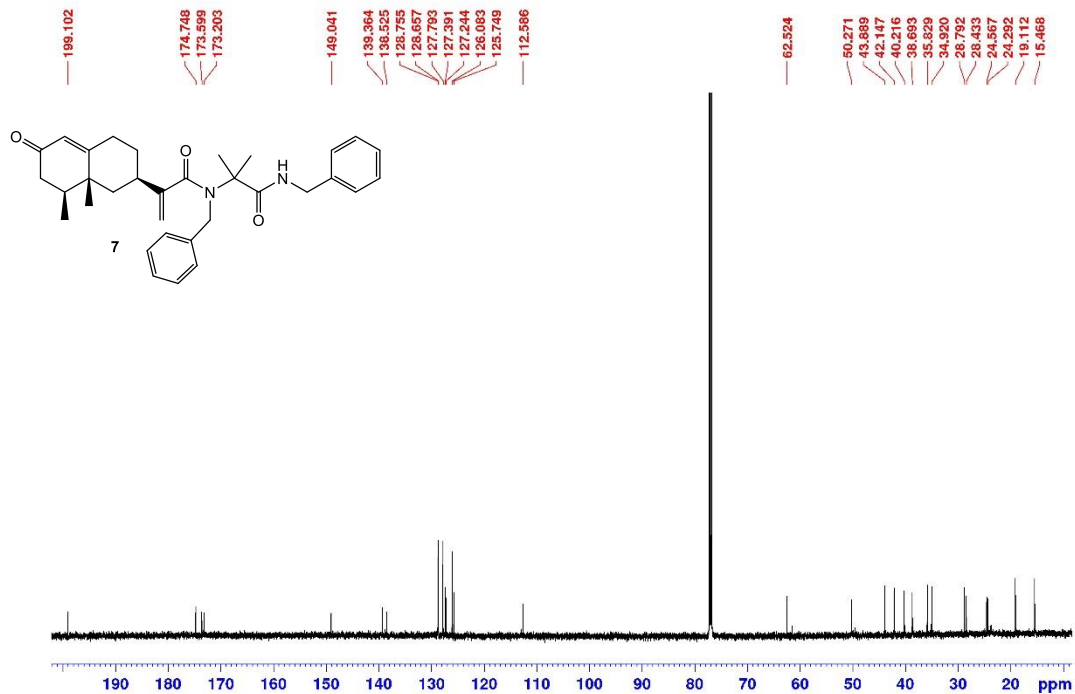

Figure S23. <sup>13</sup>C-NMR of 7.

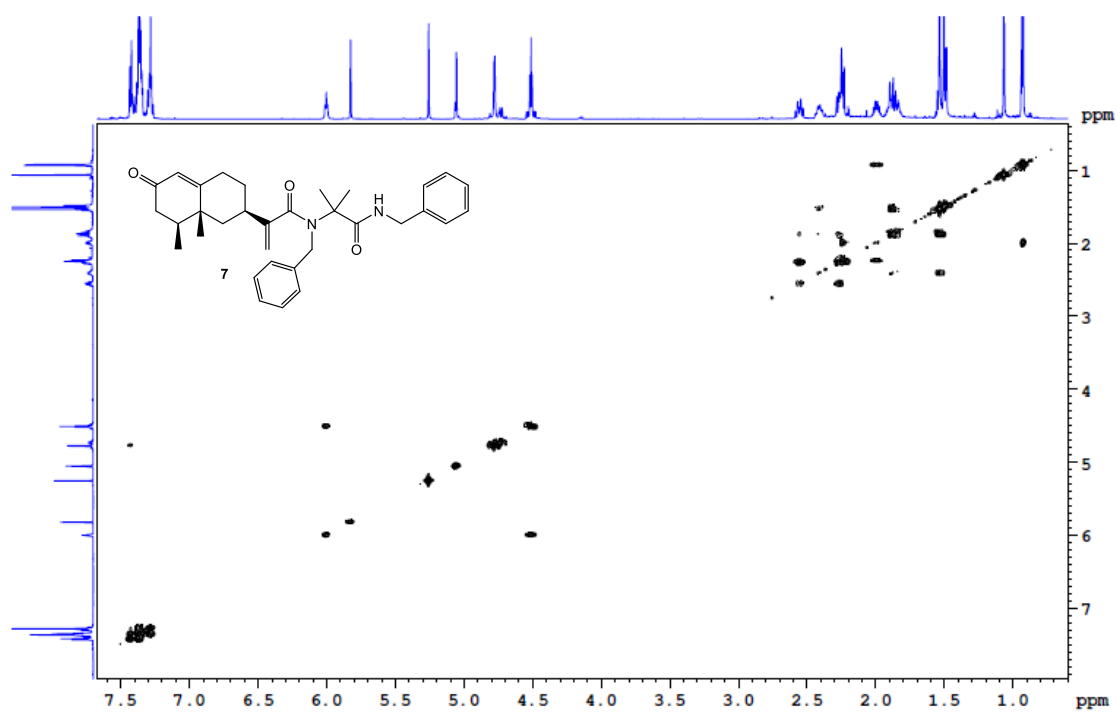

Figure S24. COSY of 7.

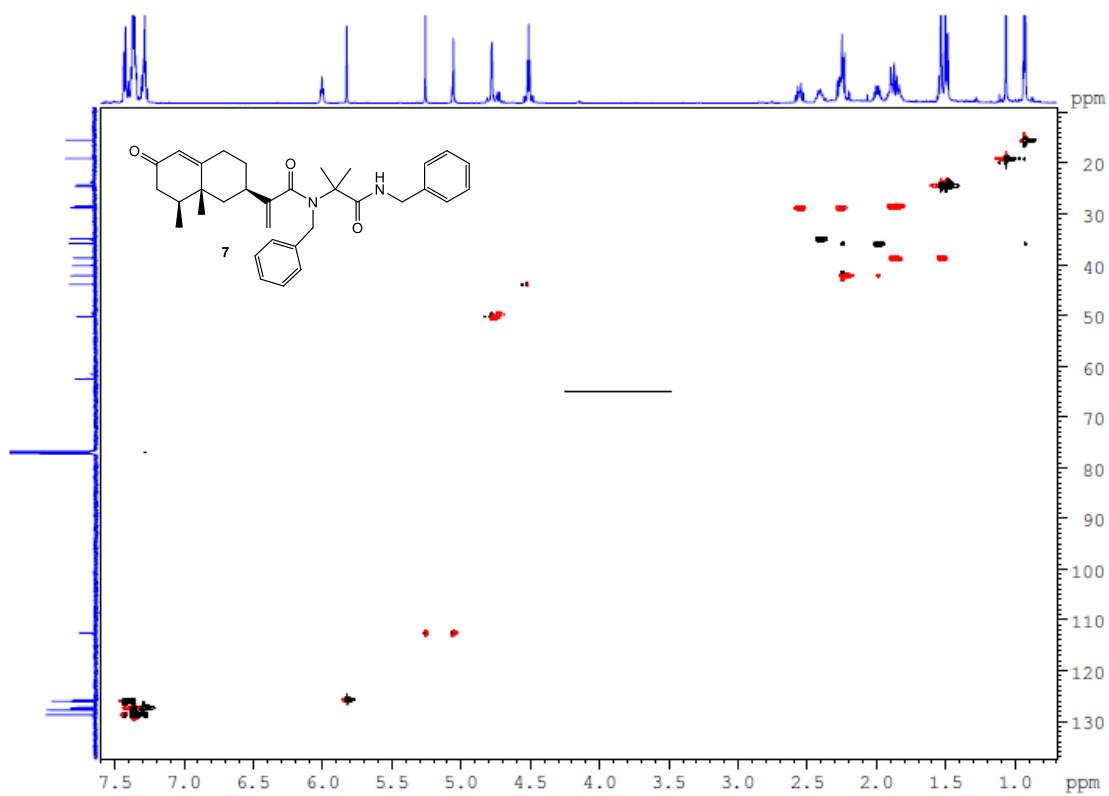

Figure S25. HSQC of 7.

mfb-060

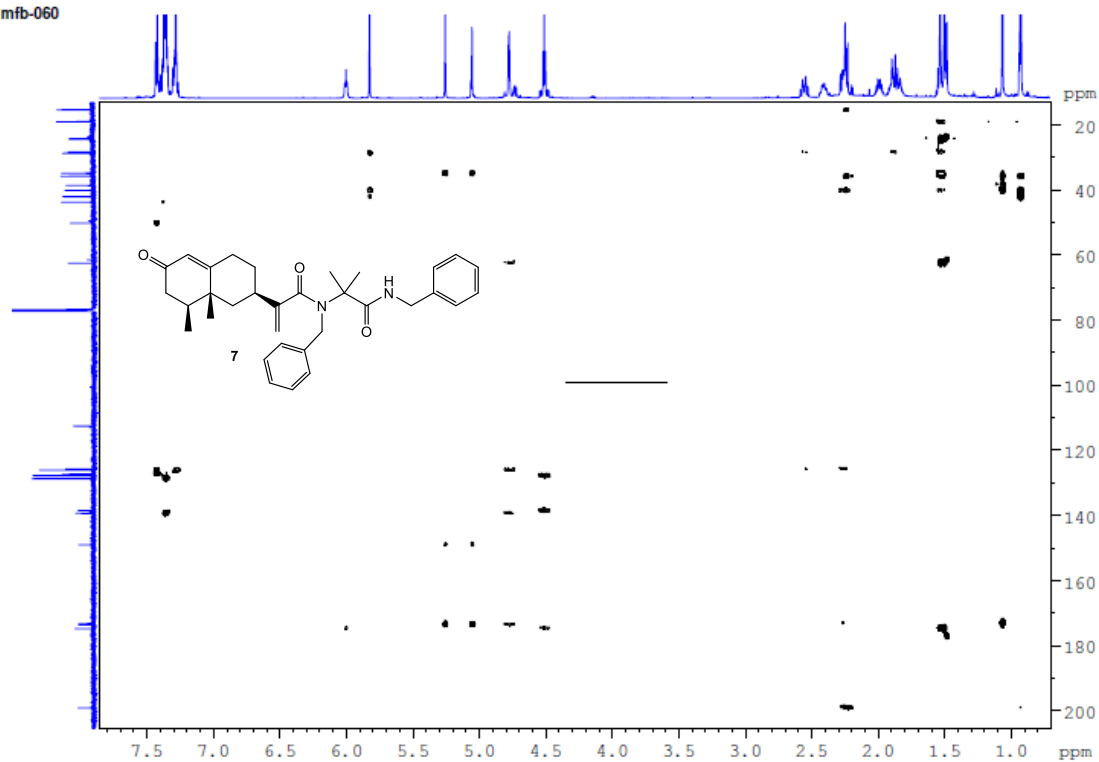

Figure S26. HMBC of 7.

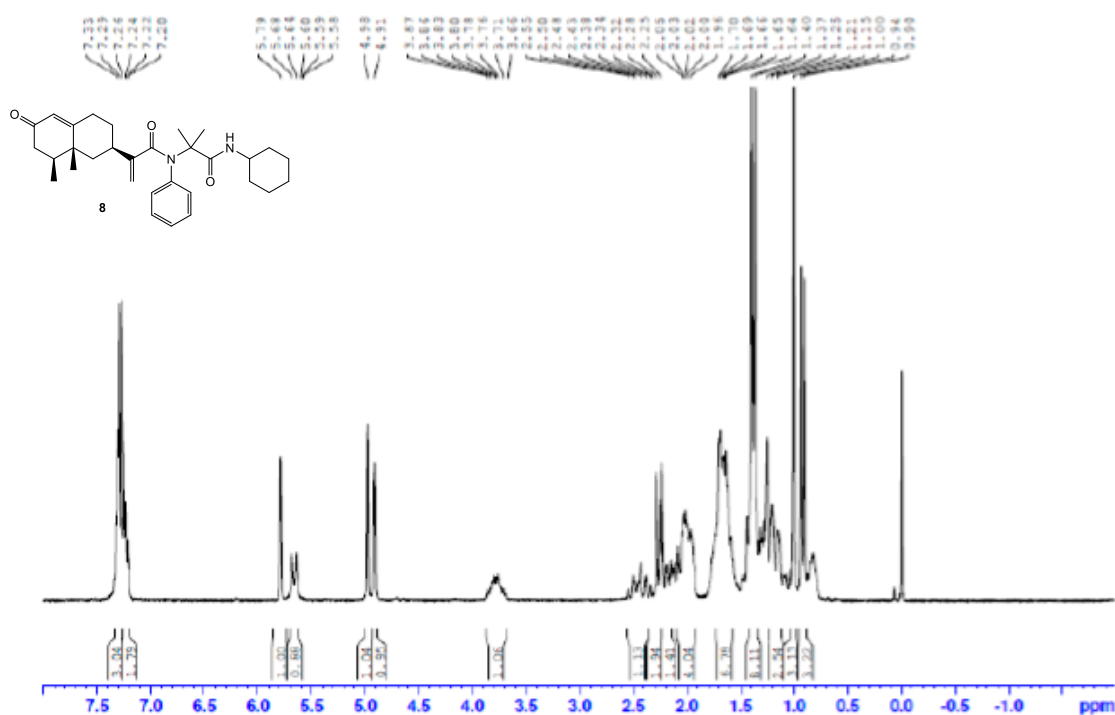

Figure S27.  $^1\text{H}$ -NMR of 8.

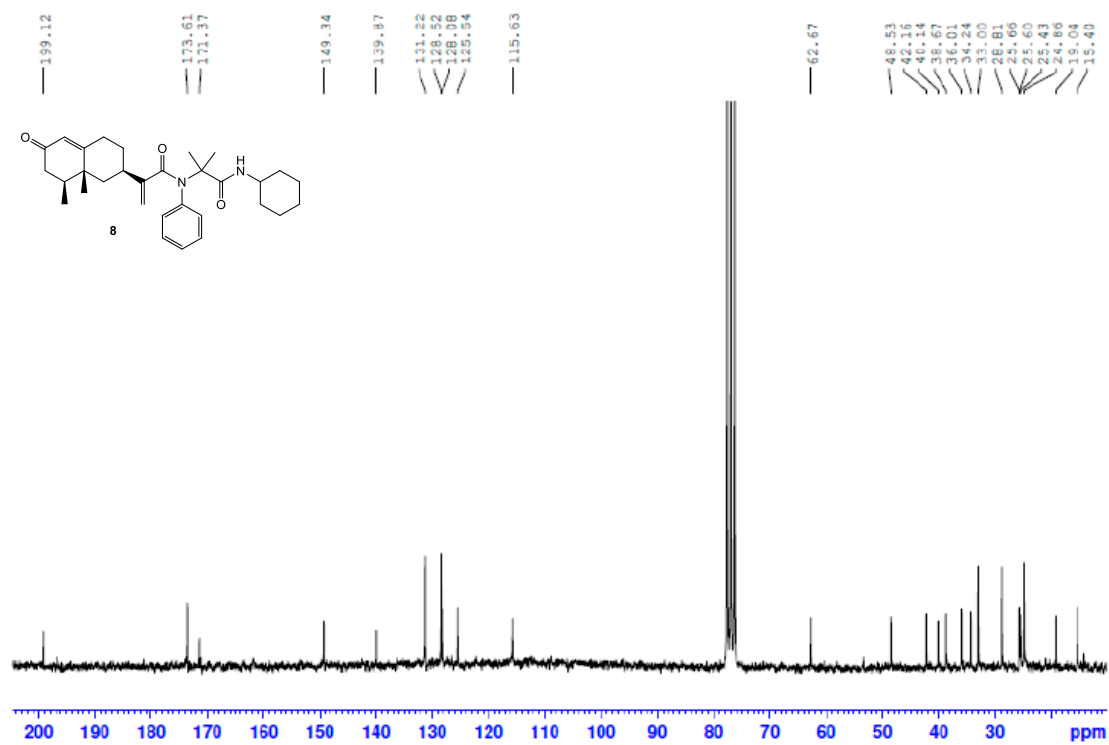

Figure S28. <sup>13</sup>C-NMR of 8.

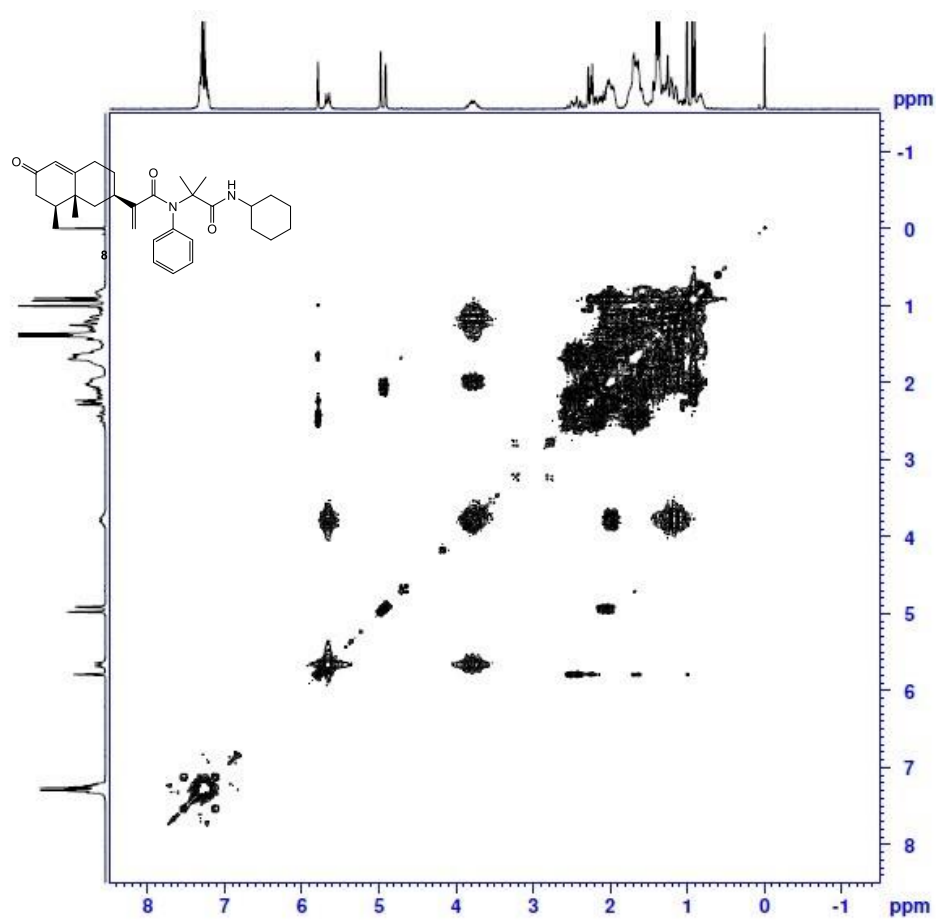

Figure S29. COSY of 8.

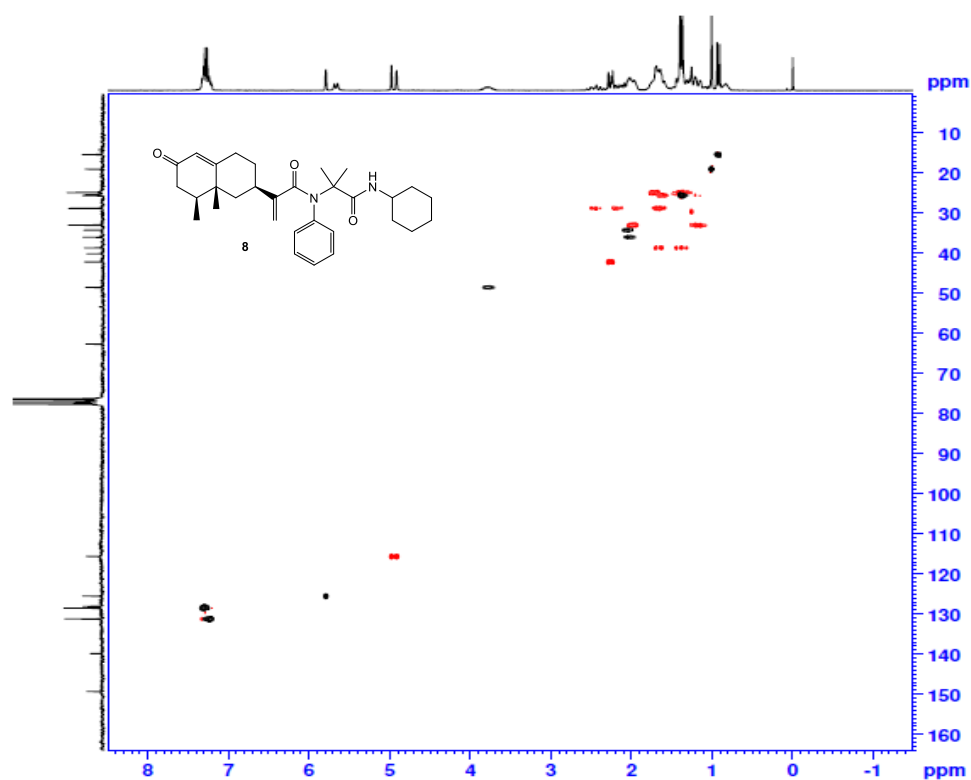

Figure S30. HSQC of 8.

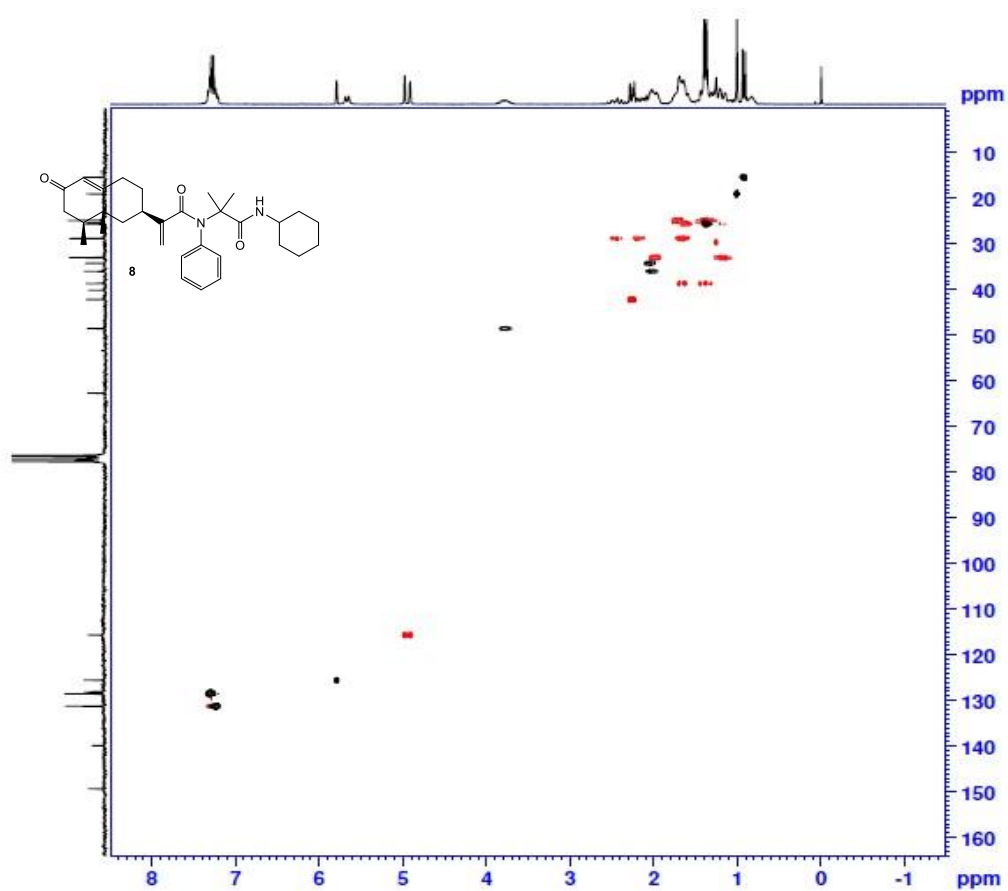

Figure S31. HSQC of 8.



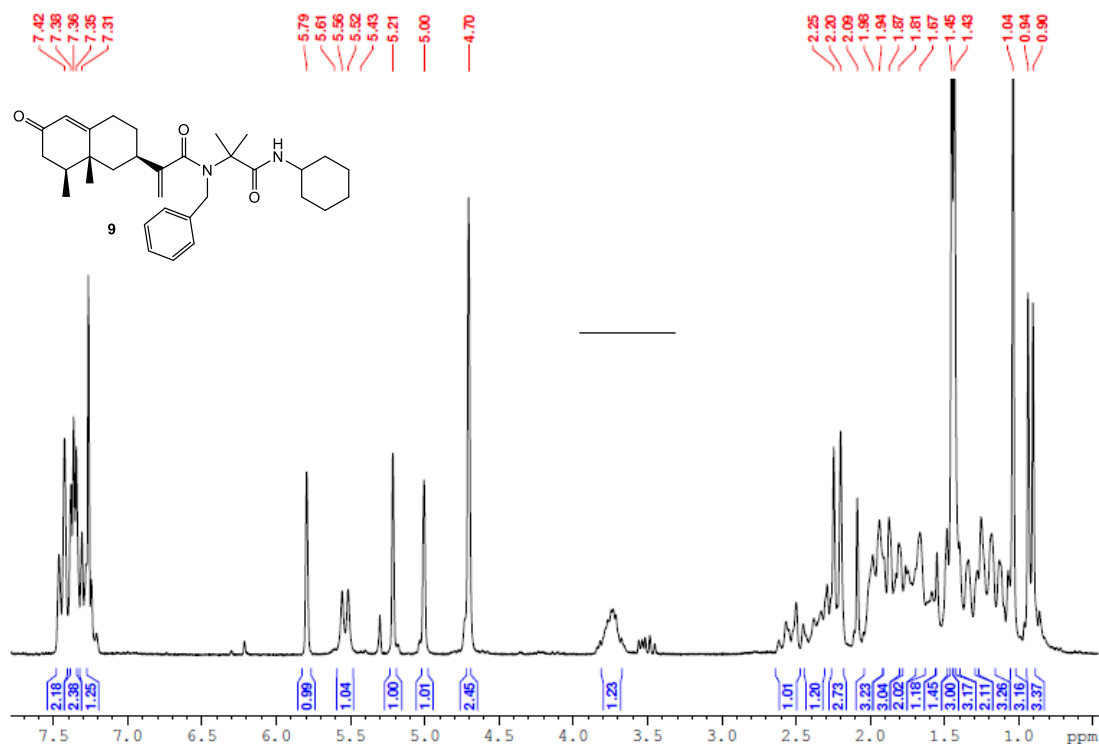

Figure S32. <sup>1</sup>H-NMR of 9.

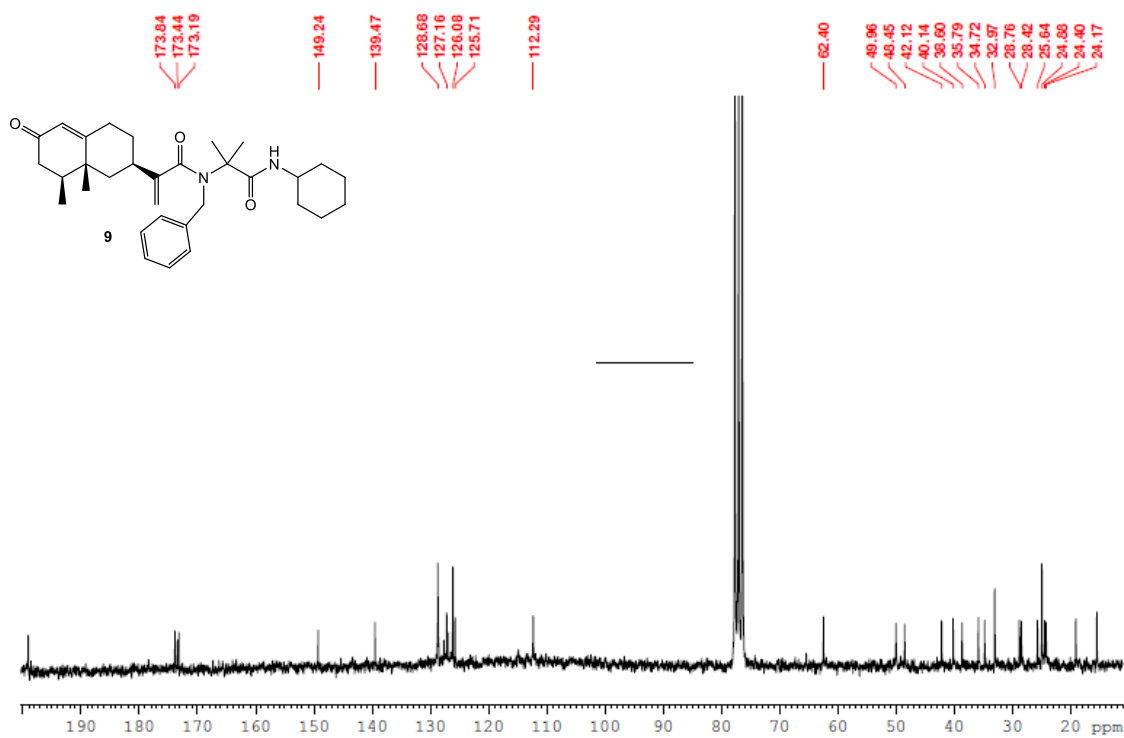

Figure S33. <sup>13</sup>C-NMR of 9.

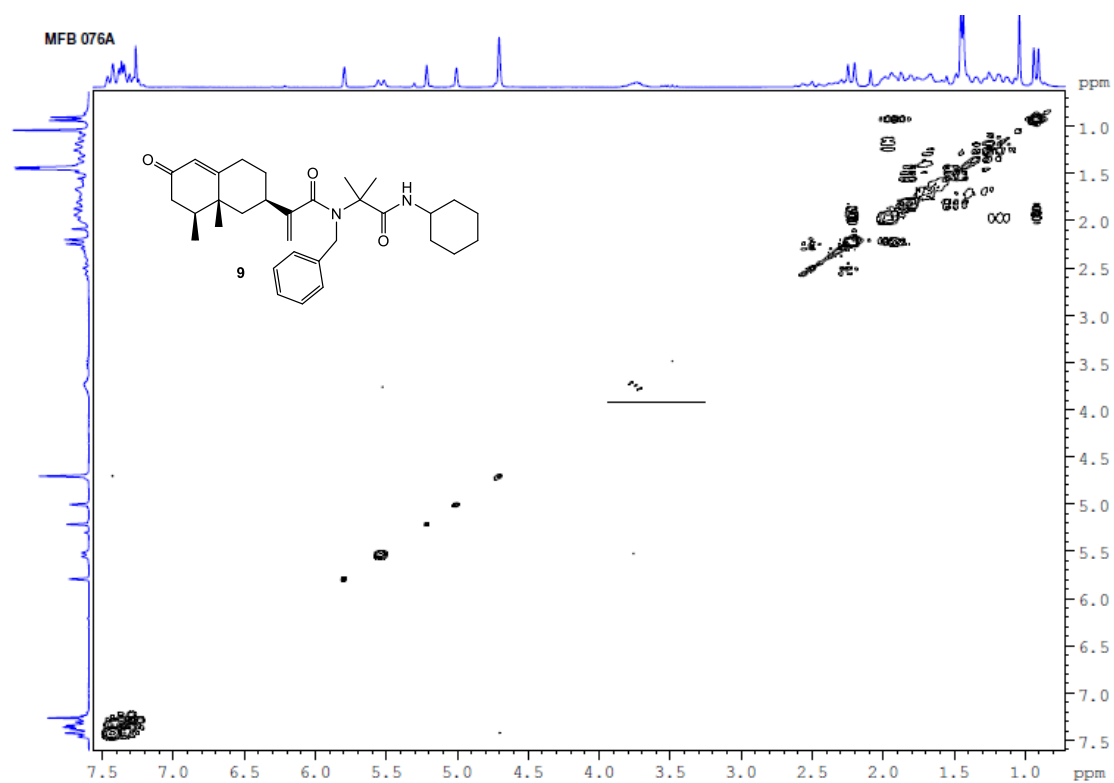

Figure S34. COSY of 9.

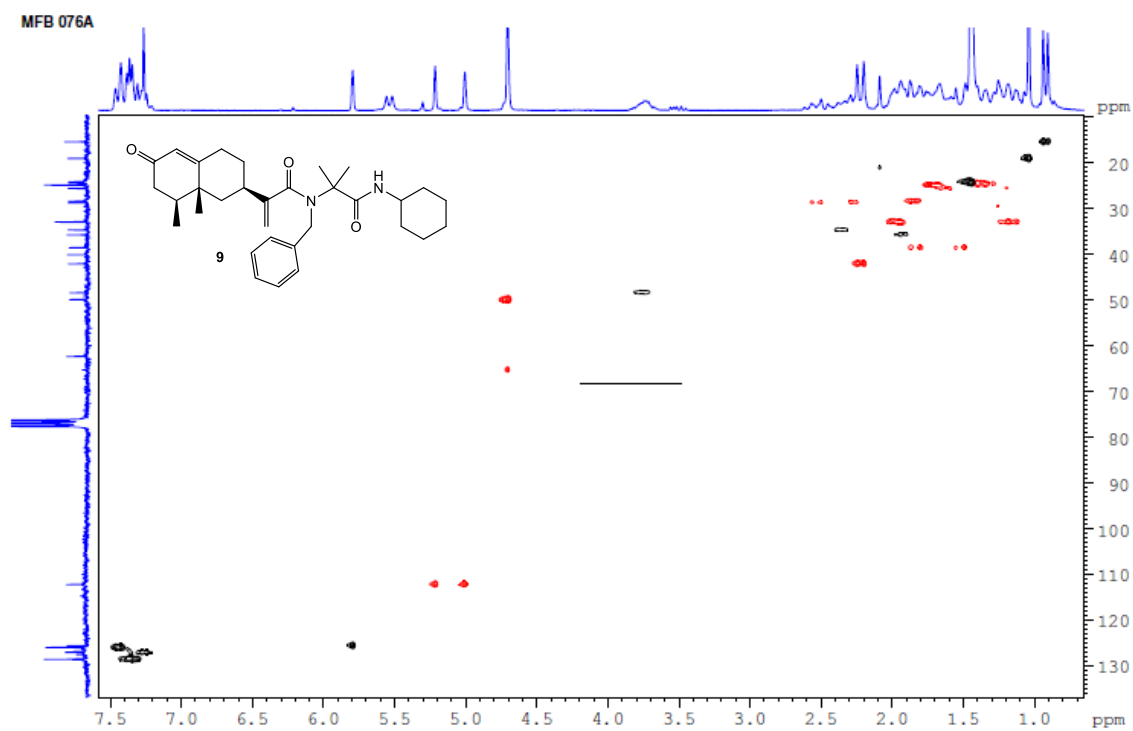

Figure S35. HSQC of 9.

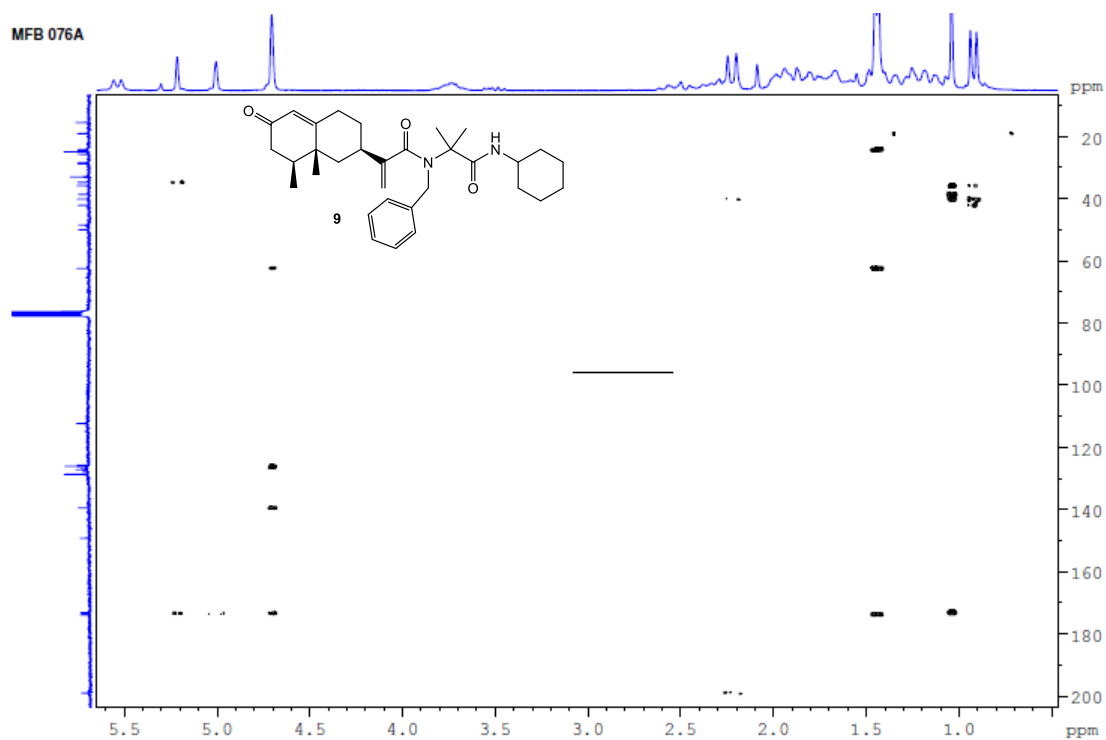

Figure S36. HMBC of 9.

### 3. NMR spectra of Illicic acid derivatives

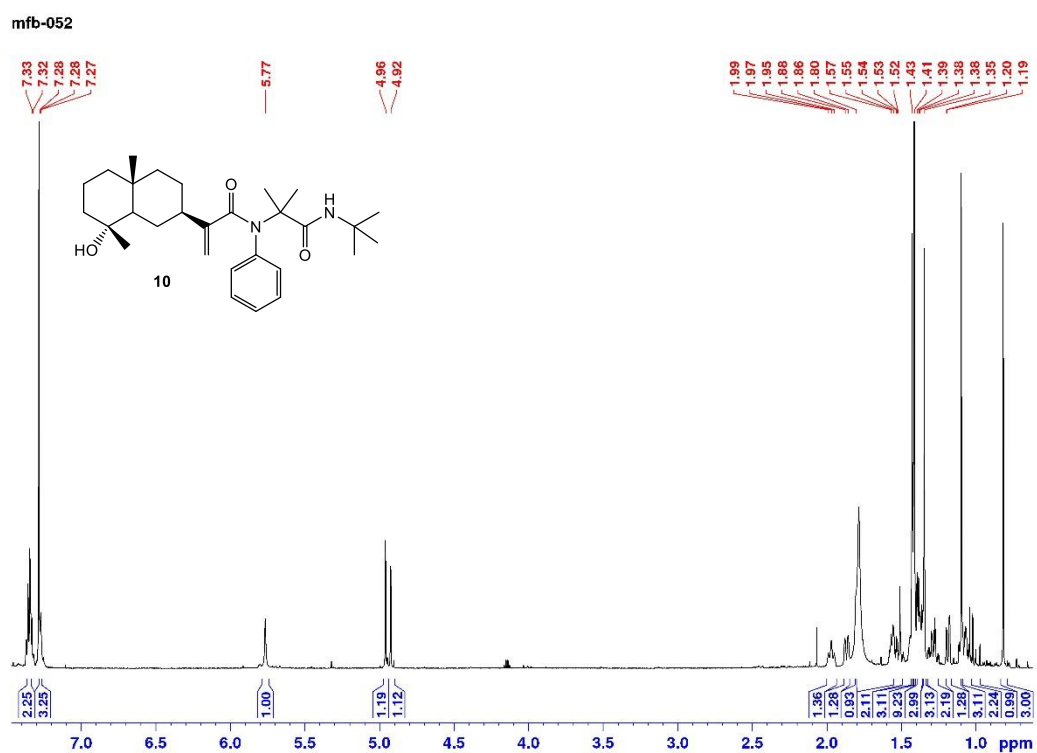

Figure S37. <sup>1</sup>H-NMR of 10.

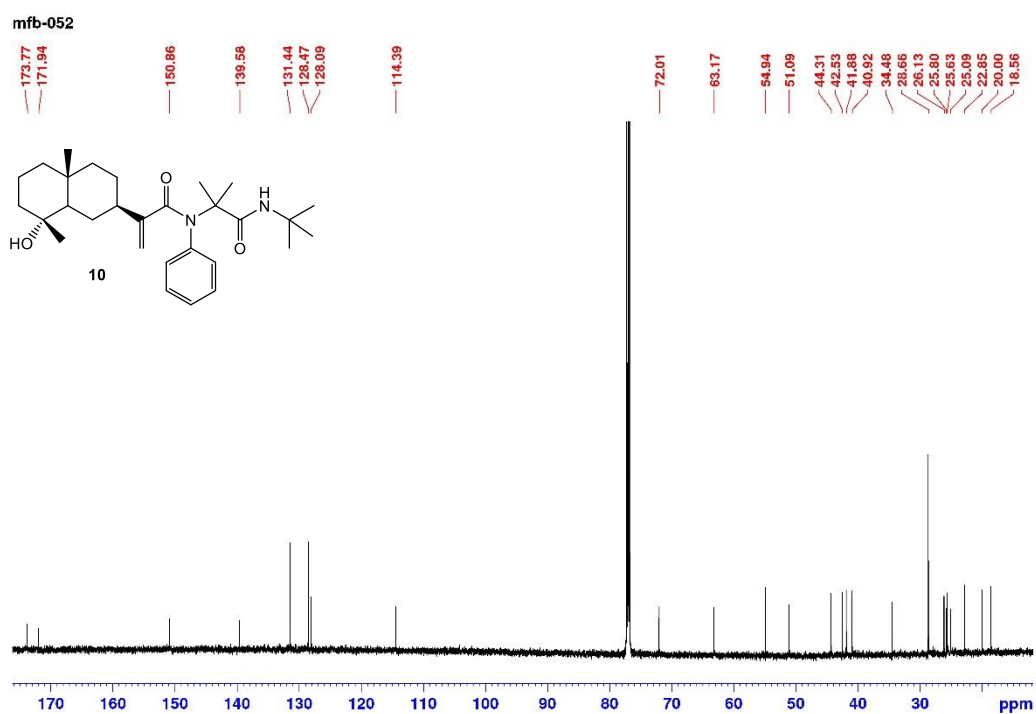

Figure S38. <sup>13</sup>C-NMR of 10.

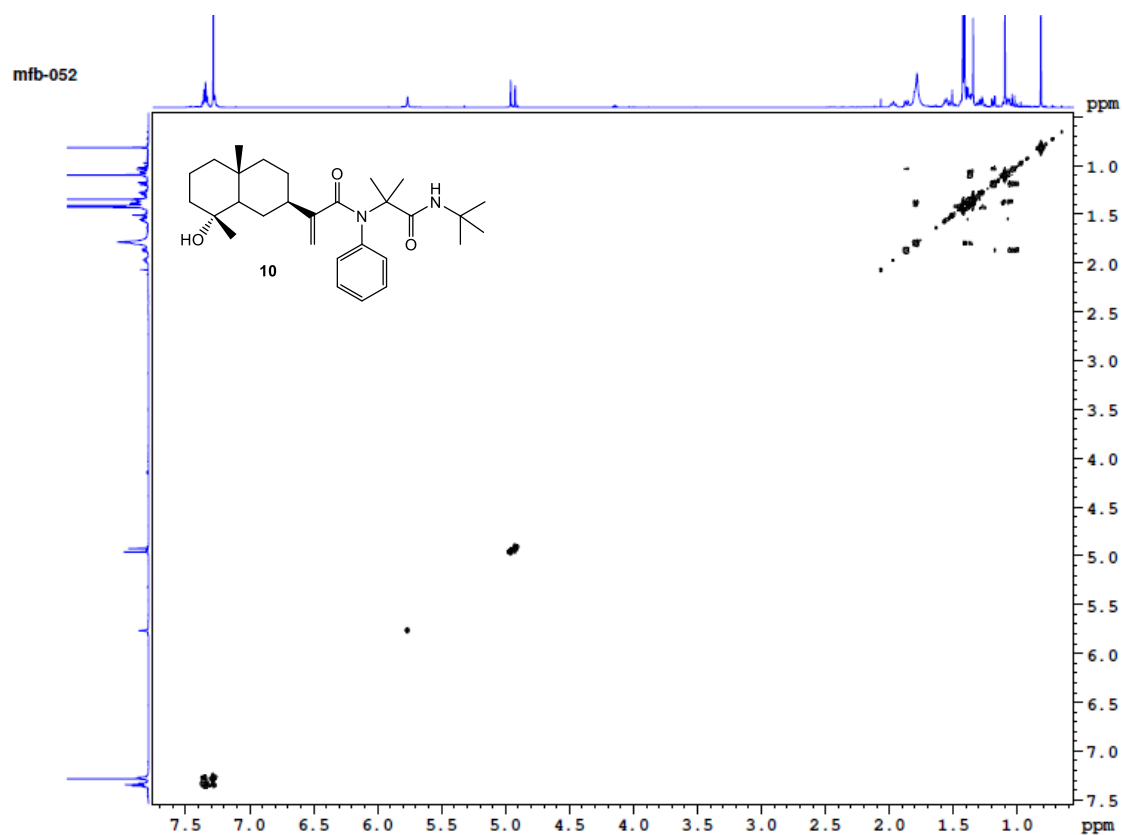

Figure S39. COSY of 10.

mfb-052

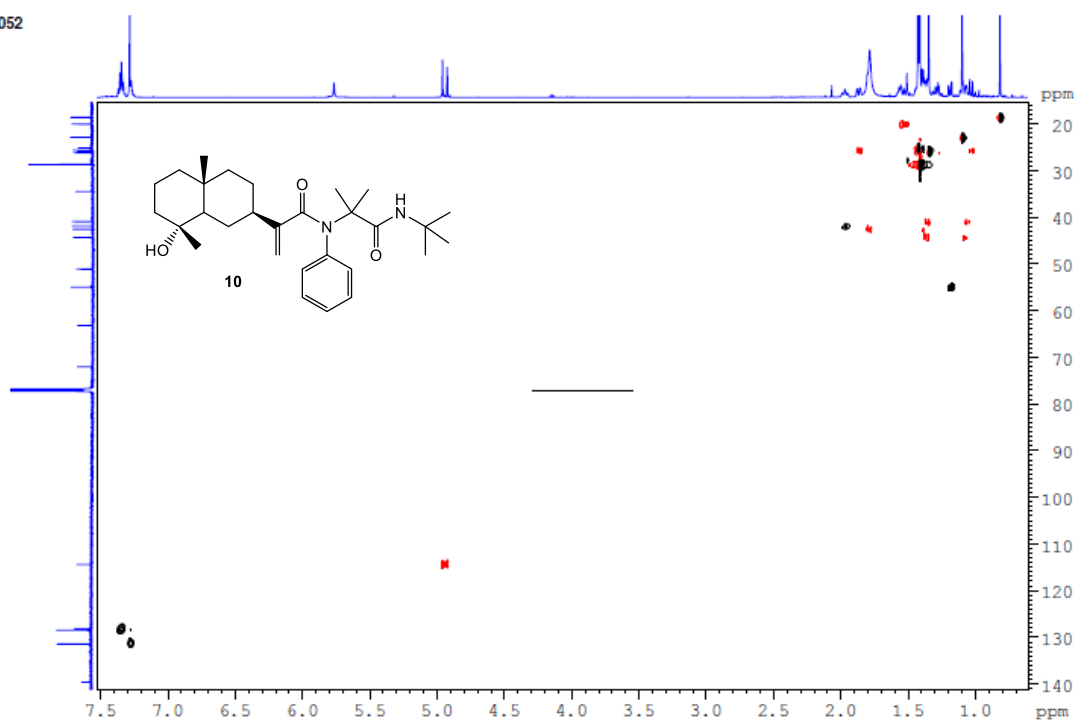

mfb-052

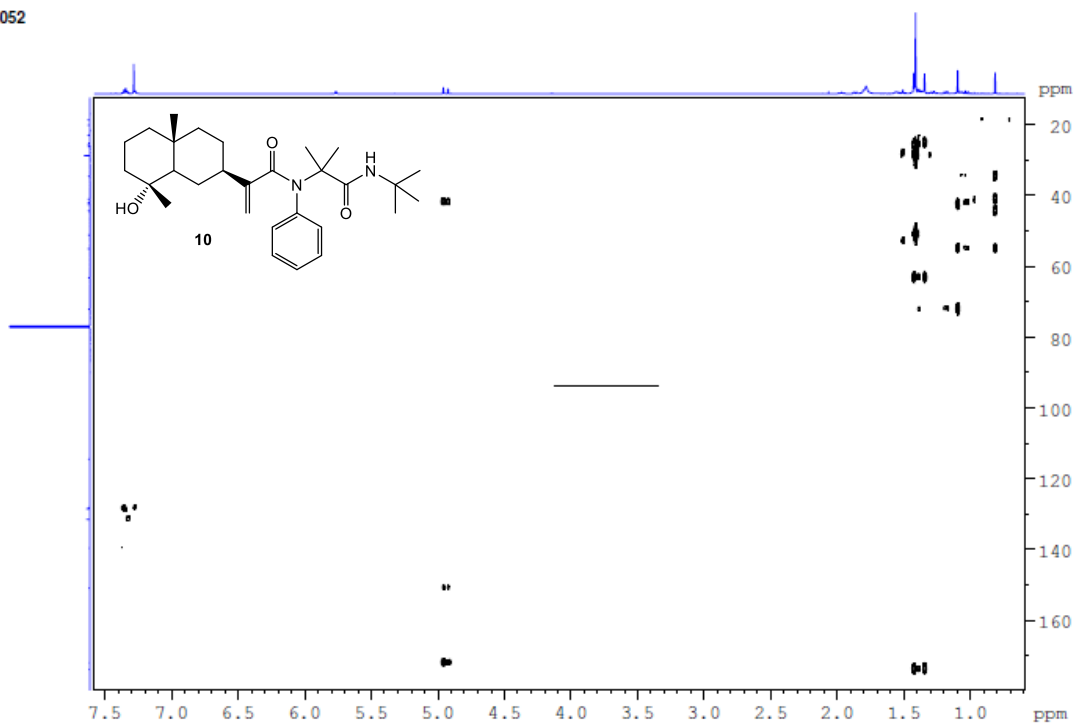

mfb-053

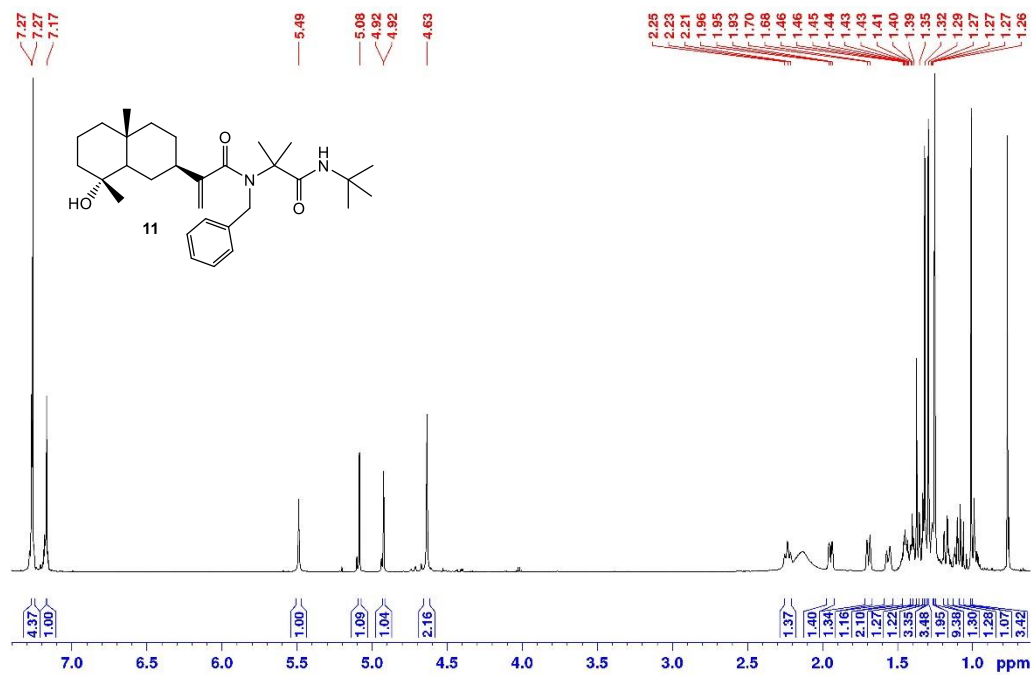

Figure S42. <sup>1</sup>H-NMR of 11.

mfb-053

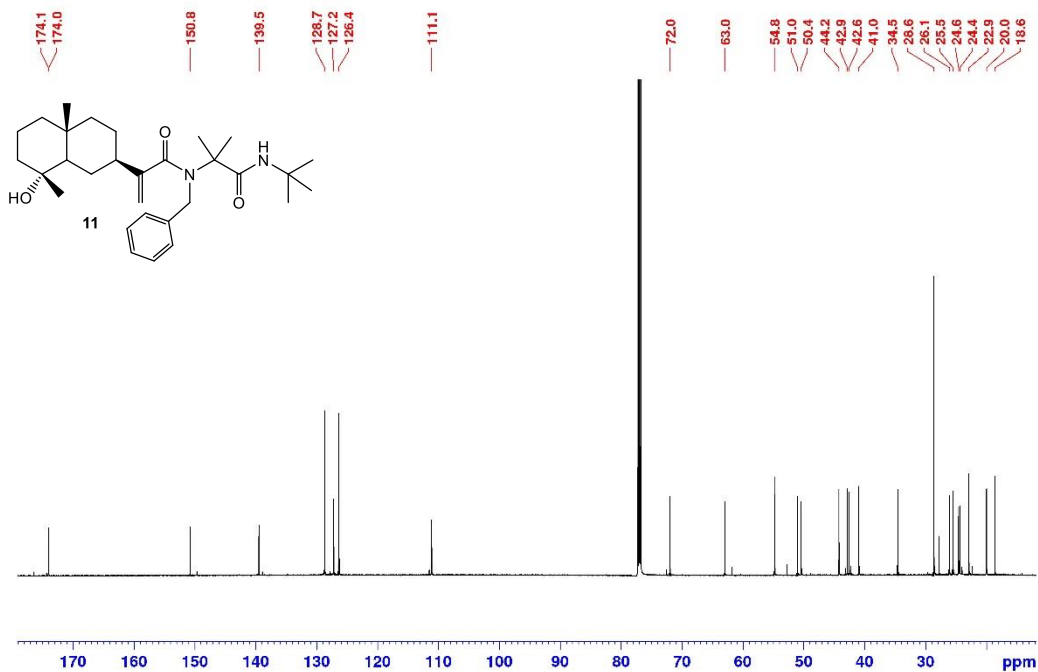

Figure S43. <sup>13</sup>C-NMR of 11.

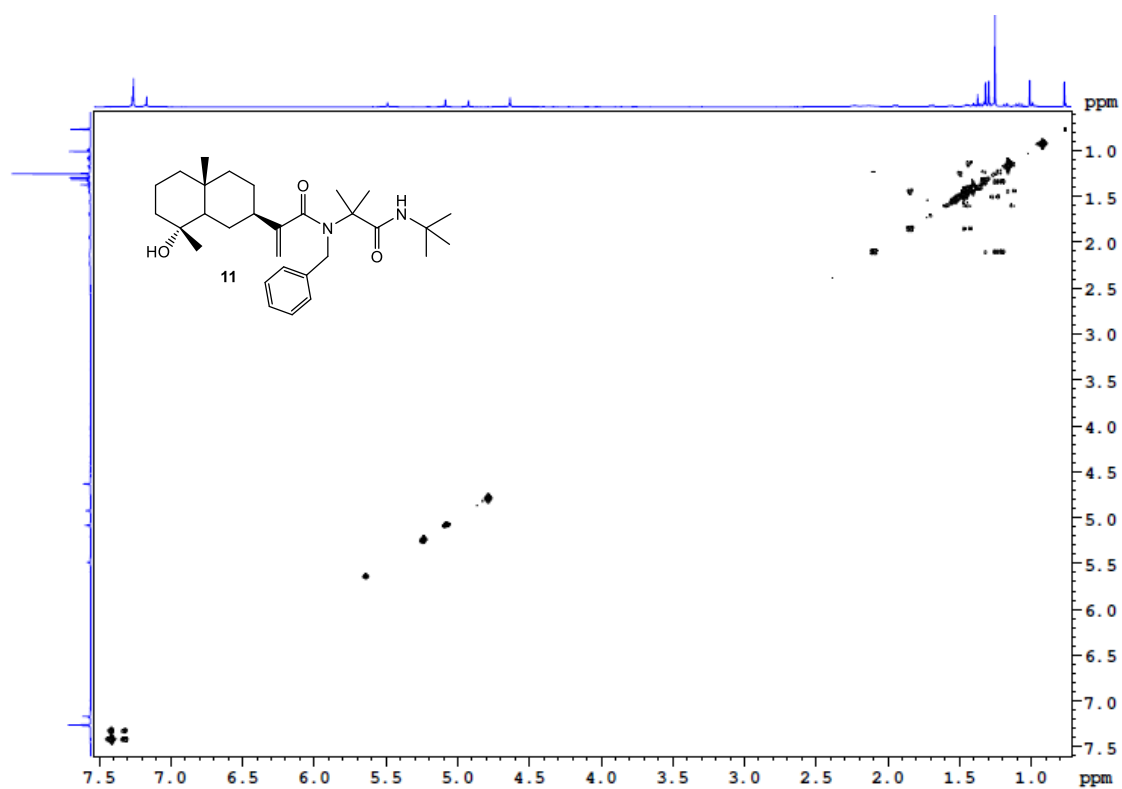

Figure S44. COSY of 11.

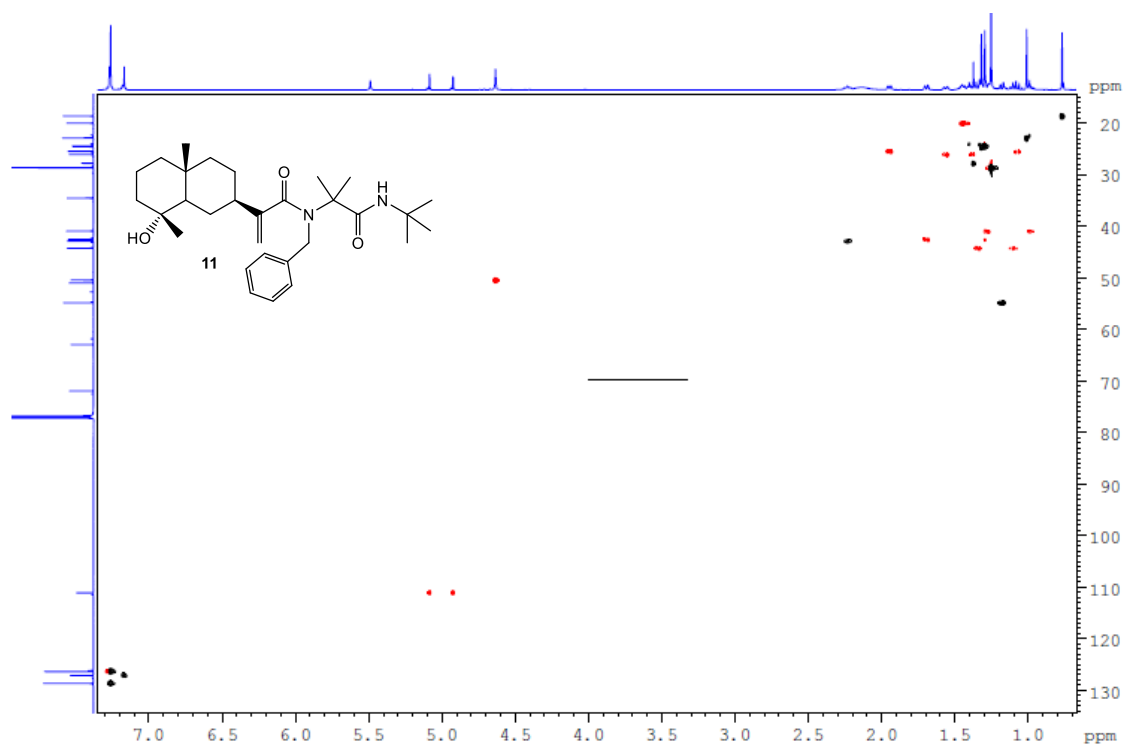

Figure S45. HSQC of 11.

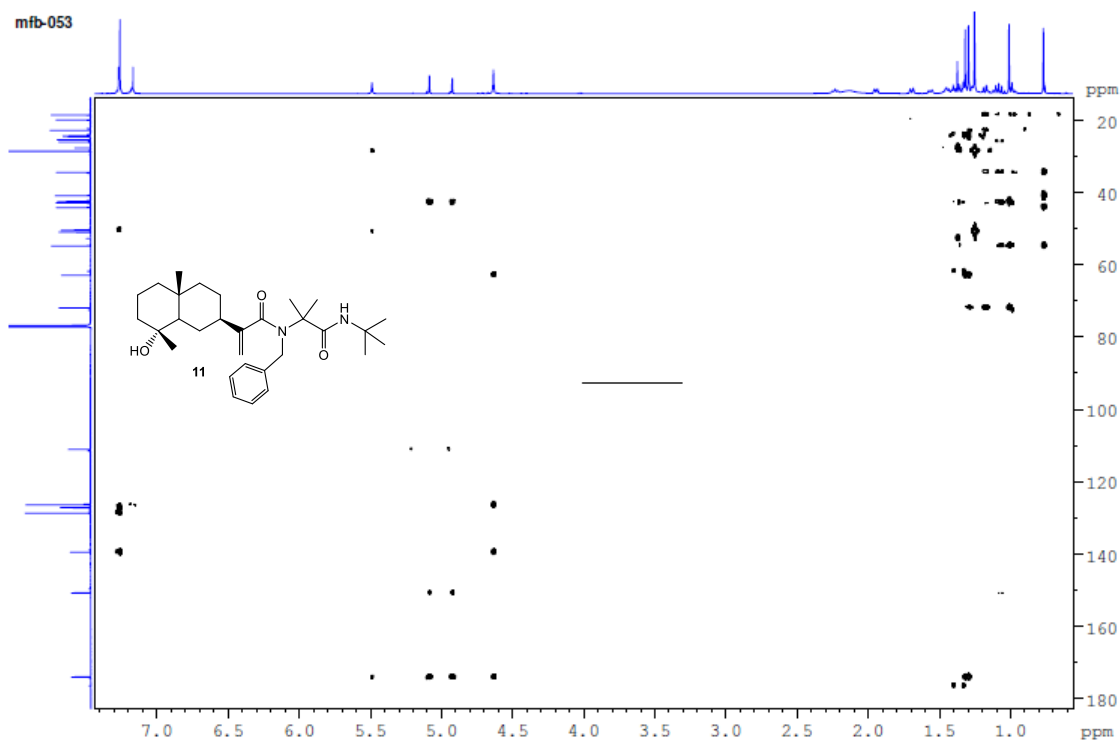

Figure S46. HMBC of 11.

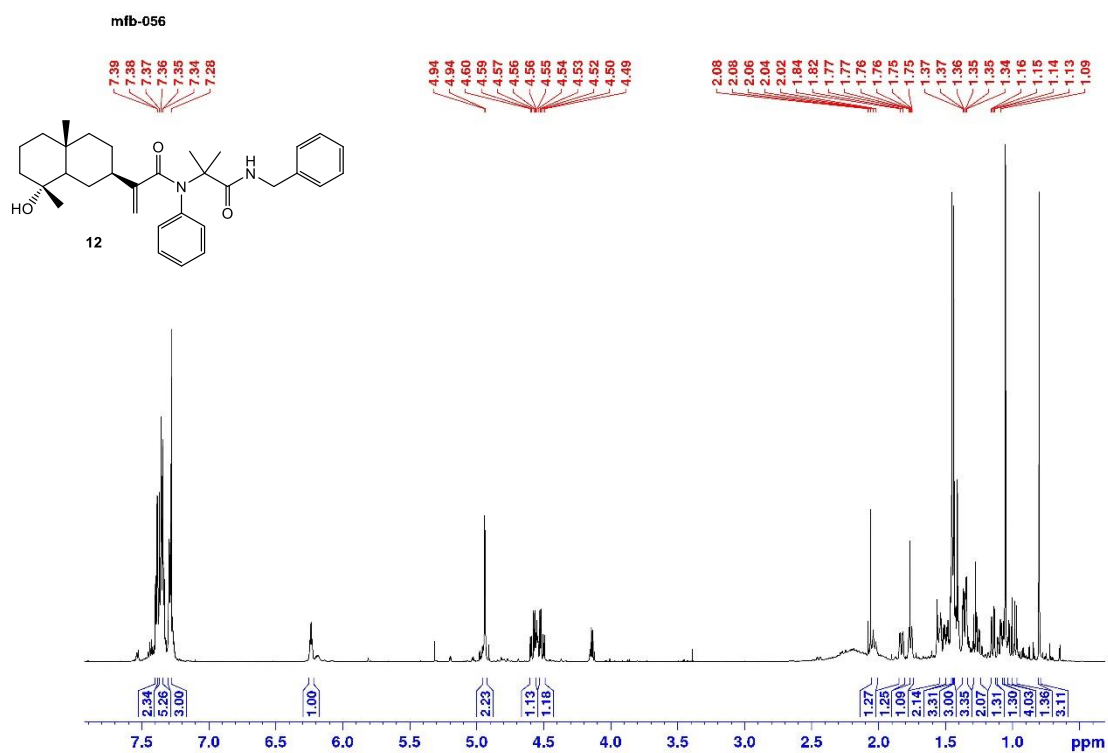

Figure S47.  $^1\text{H}$ -NMR of 12.



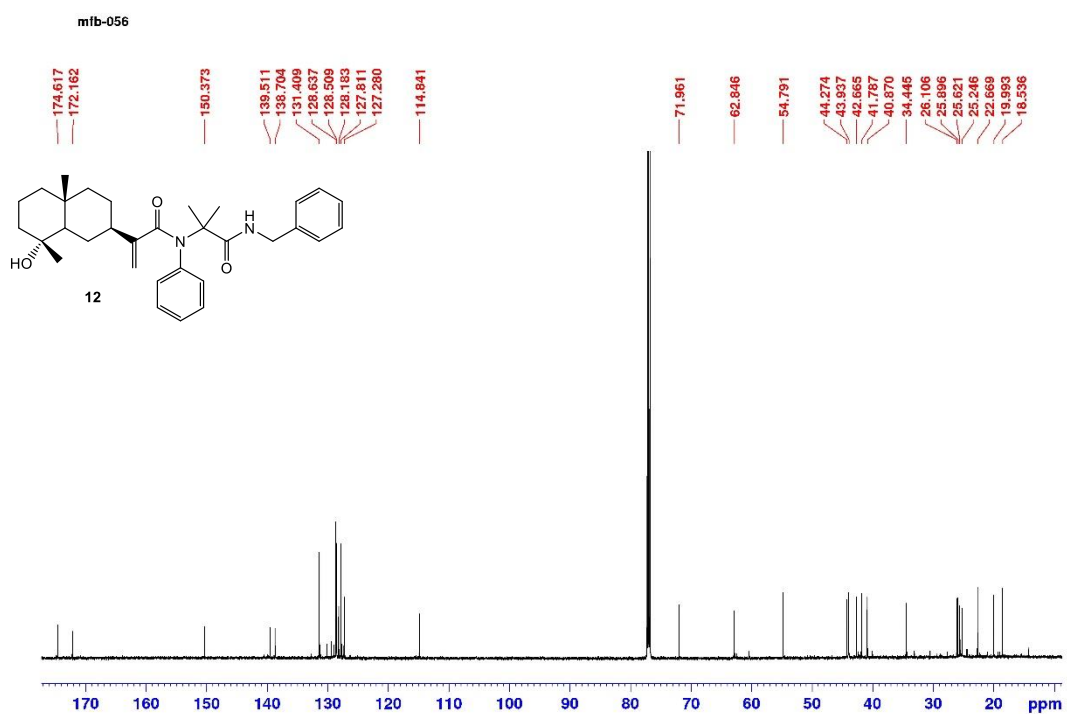

Figure S48.  $^{13}\text{C}$ -NMR of 12.

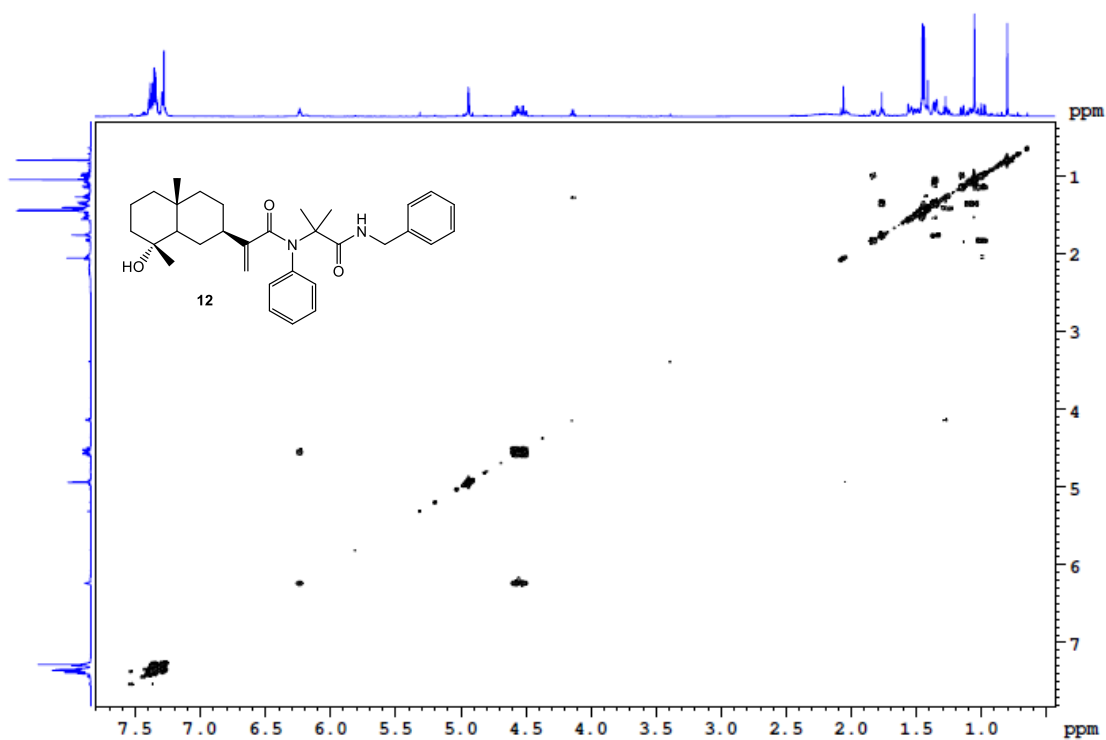

Figure S49. COSY of 12.

mf0-056

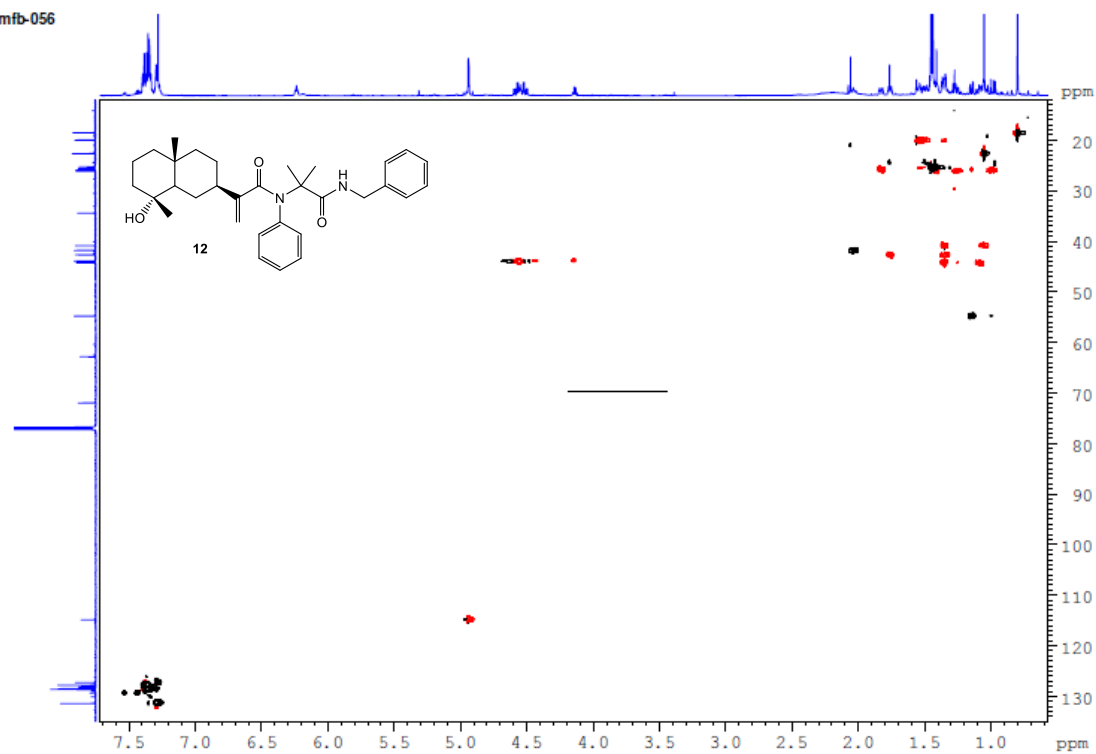

Figure S50. HSQC of 12.

mf0-056

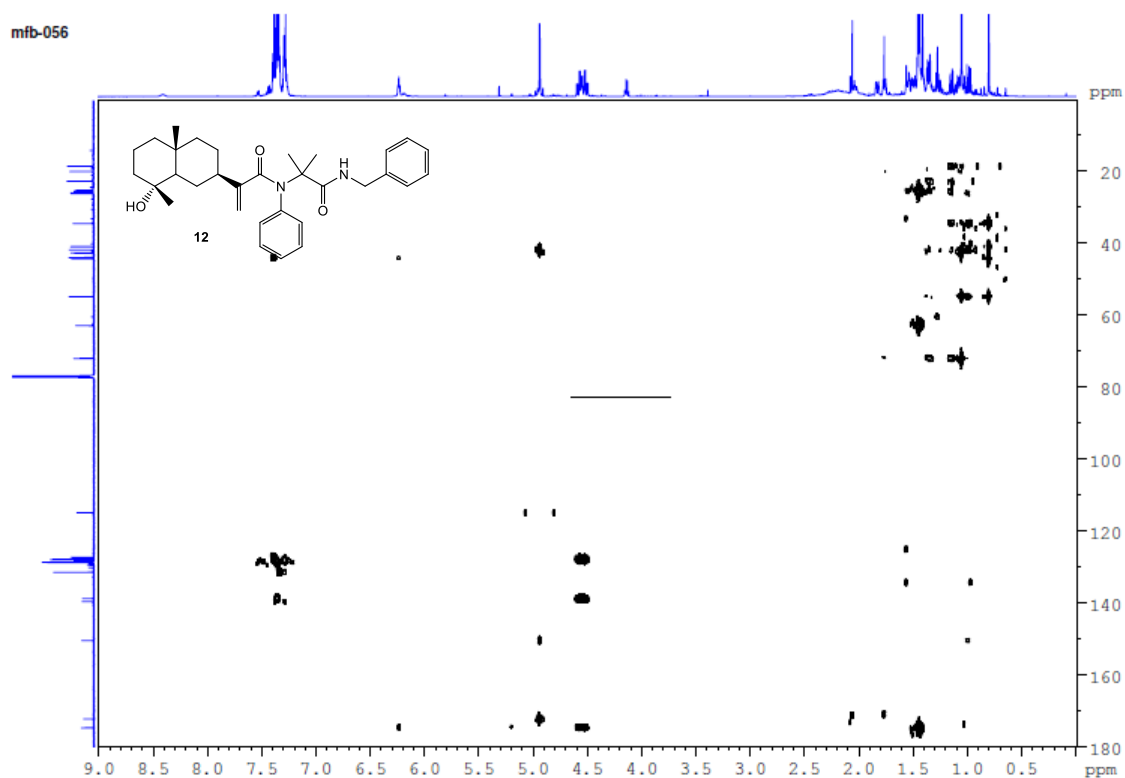

Figure S51. HMBC of 12.

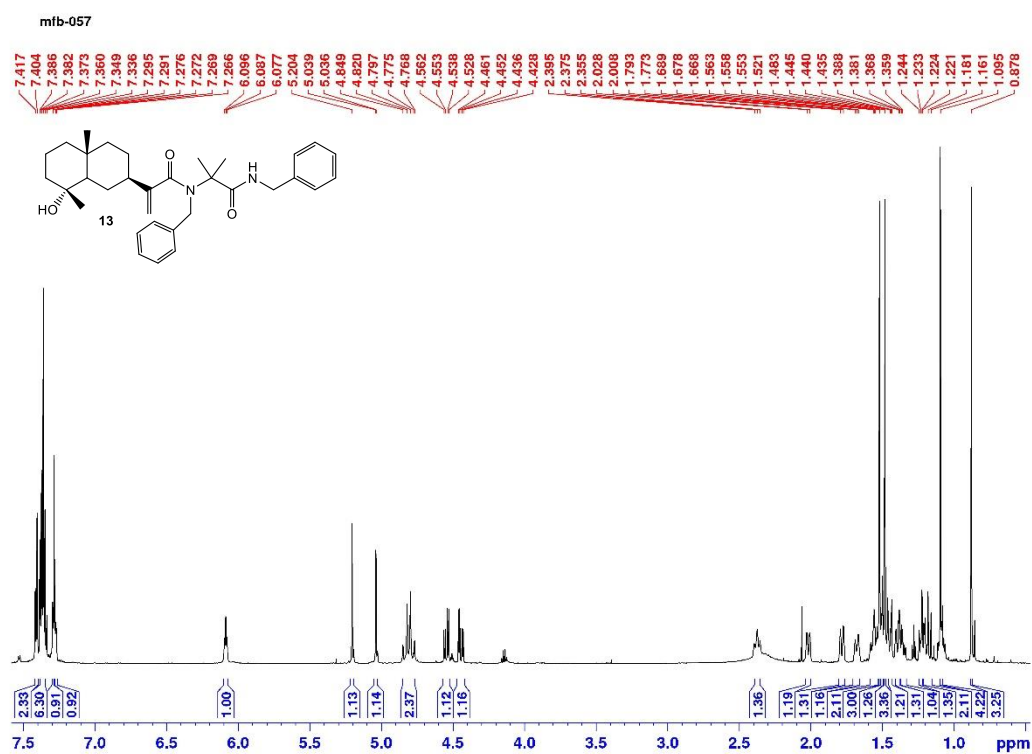

Figure S52. <sup>1</sup>H-NMR of 13.

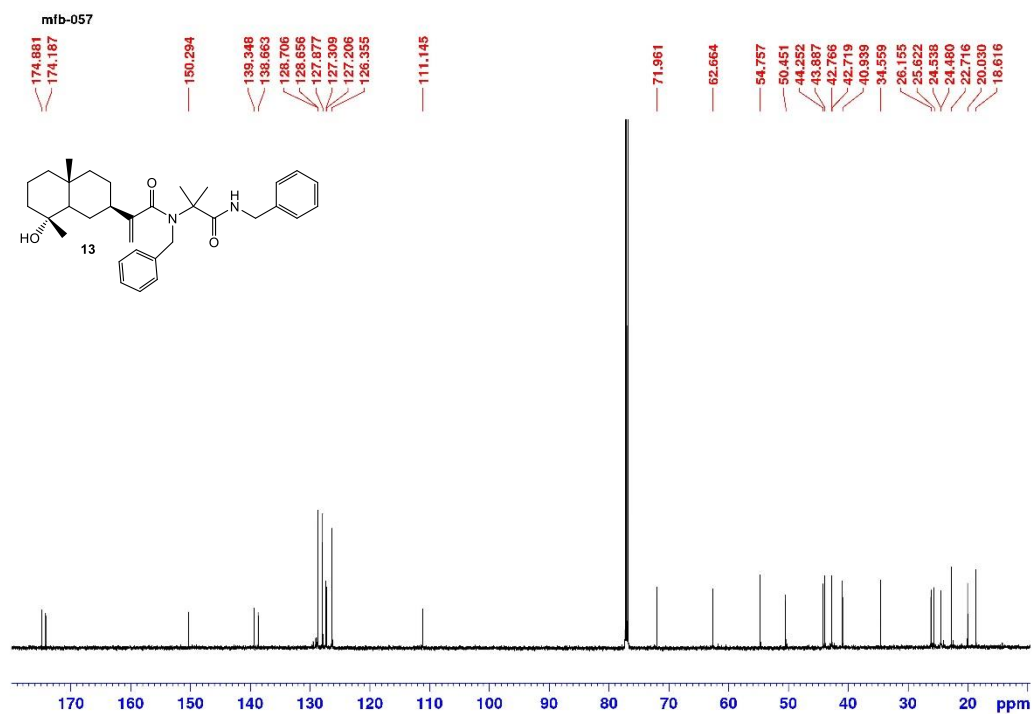

Figure S53. <sup>13</sup>C-NMR of 13.

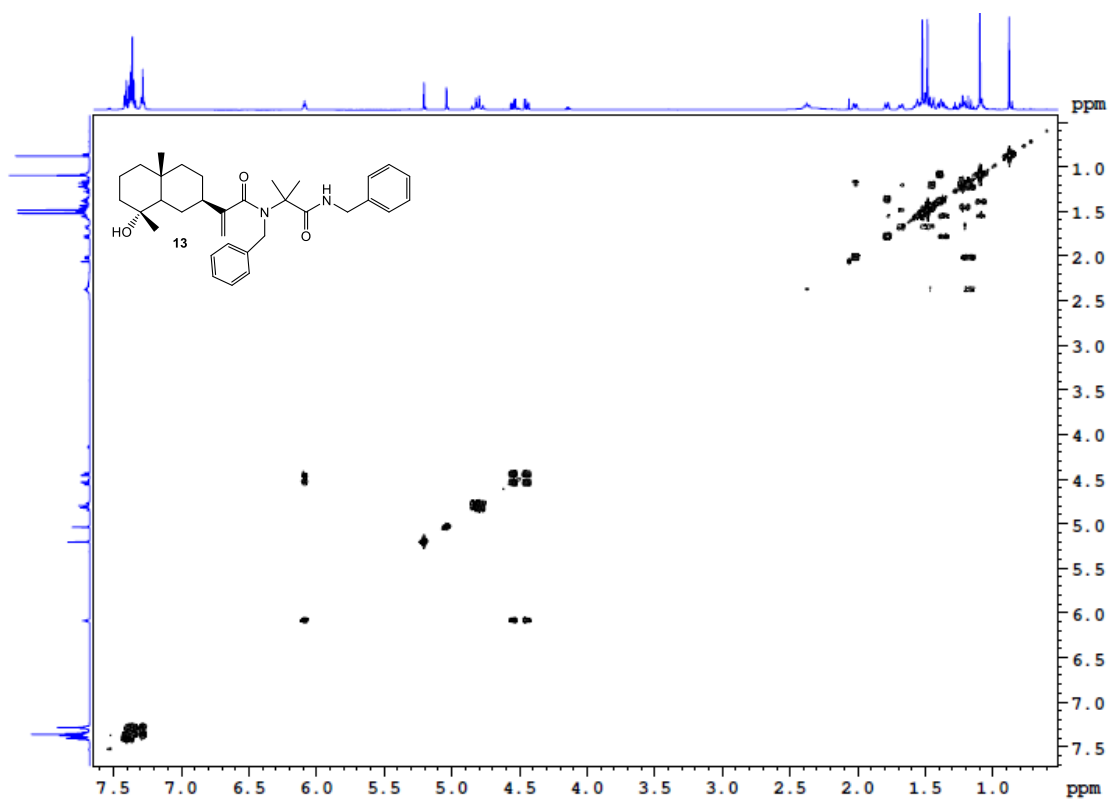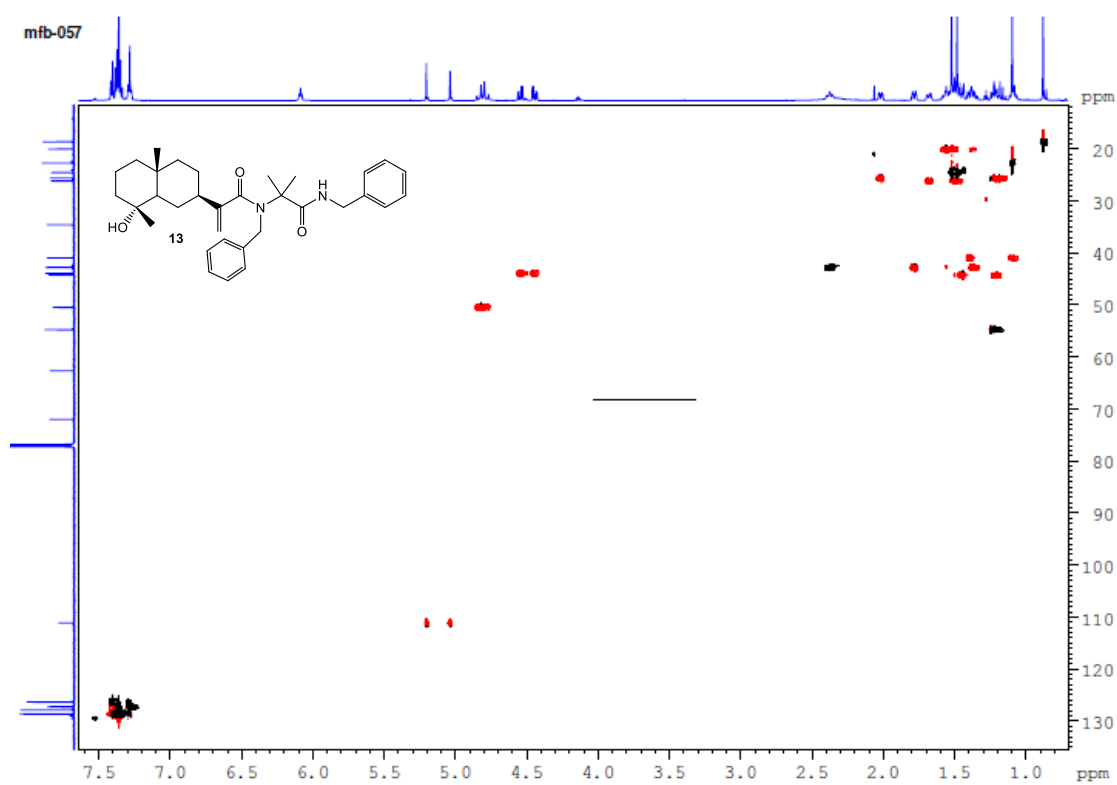

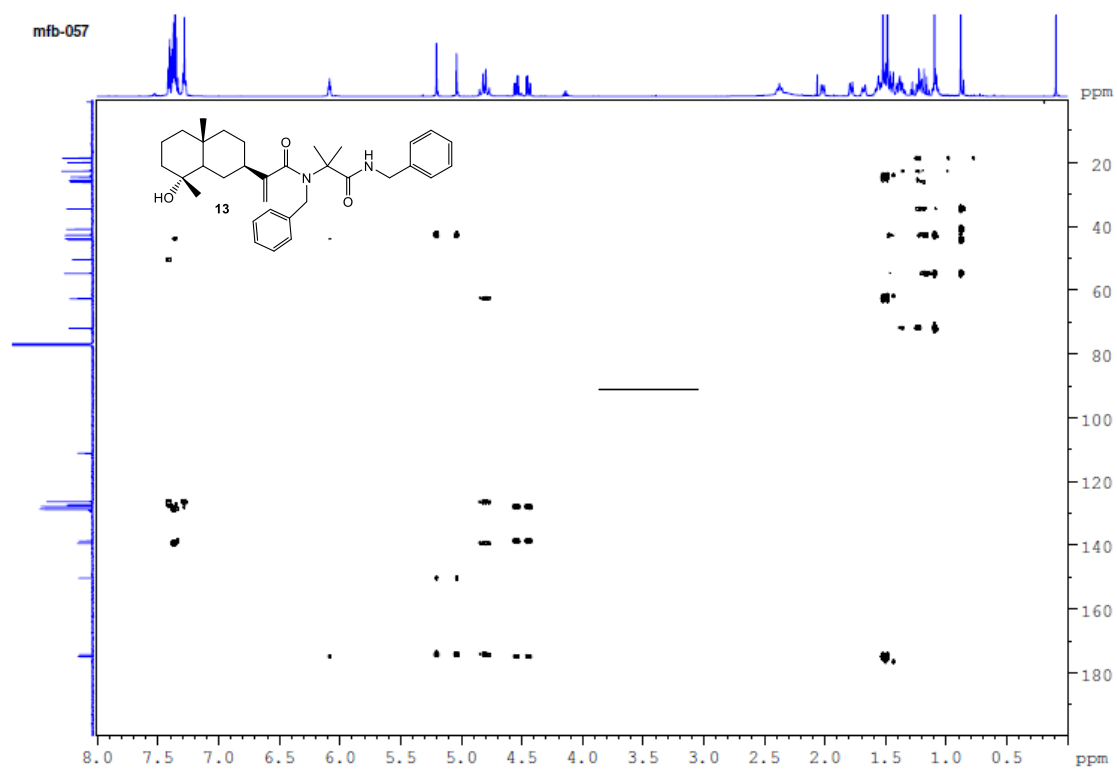

Figure S56. HMBC of 13.

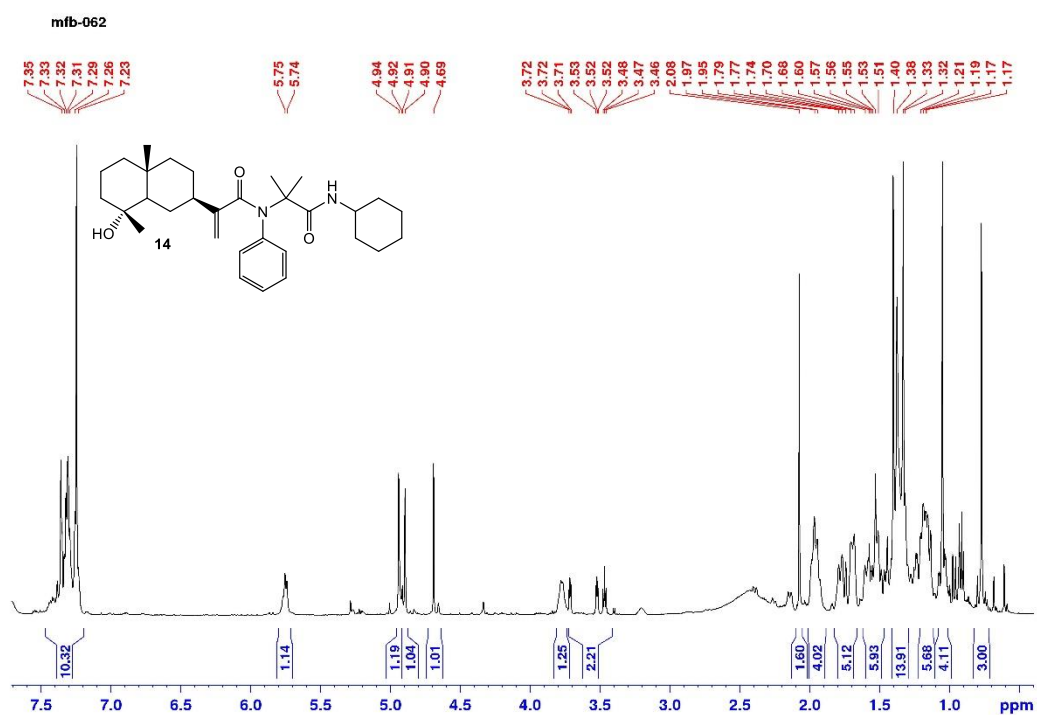

Figure S57.  $^1\text{H}$ -NMR of 14.

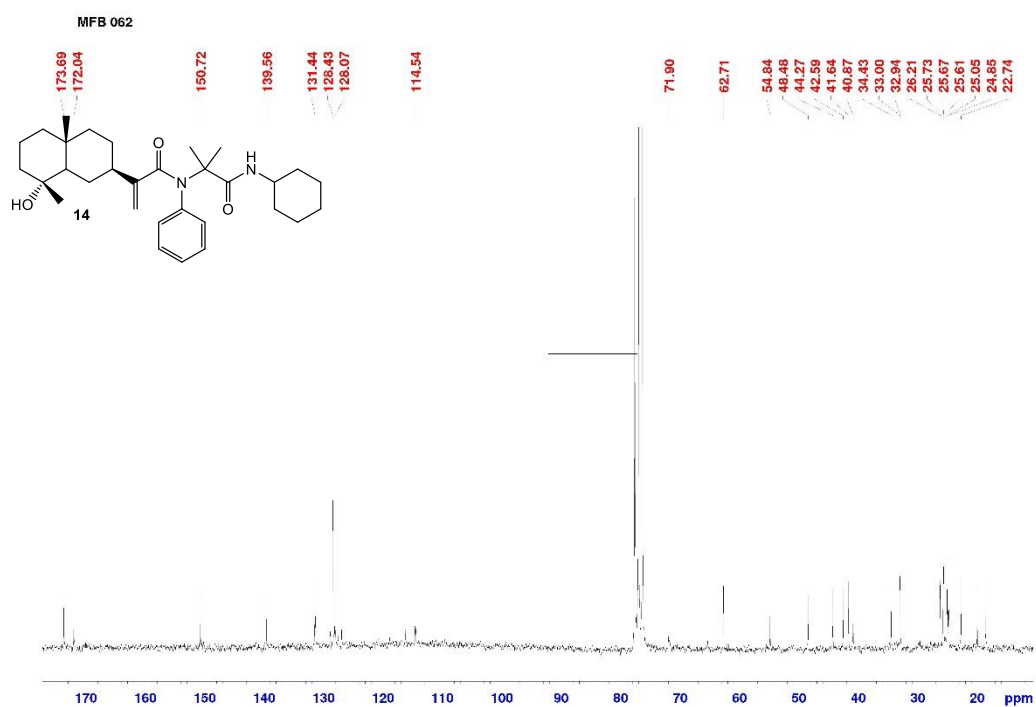

Figure S58.  $^{13}\text{C}$ -NMR of 14.

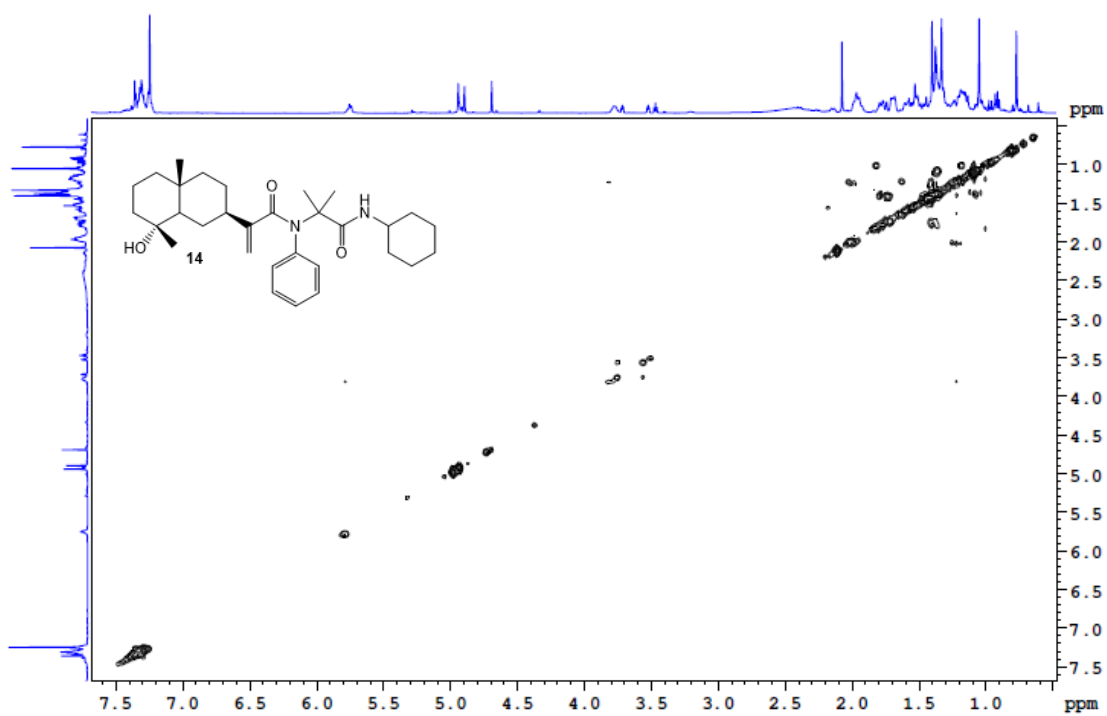

Figure S59. COSY of 14.

mf0-062

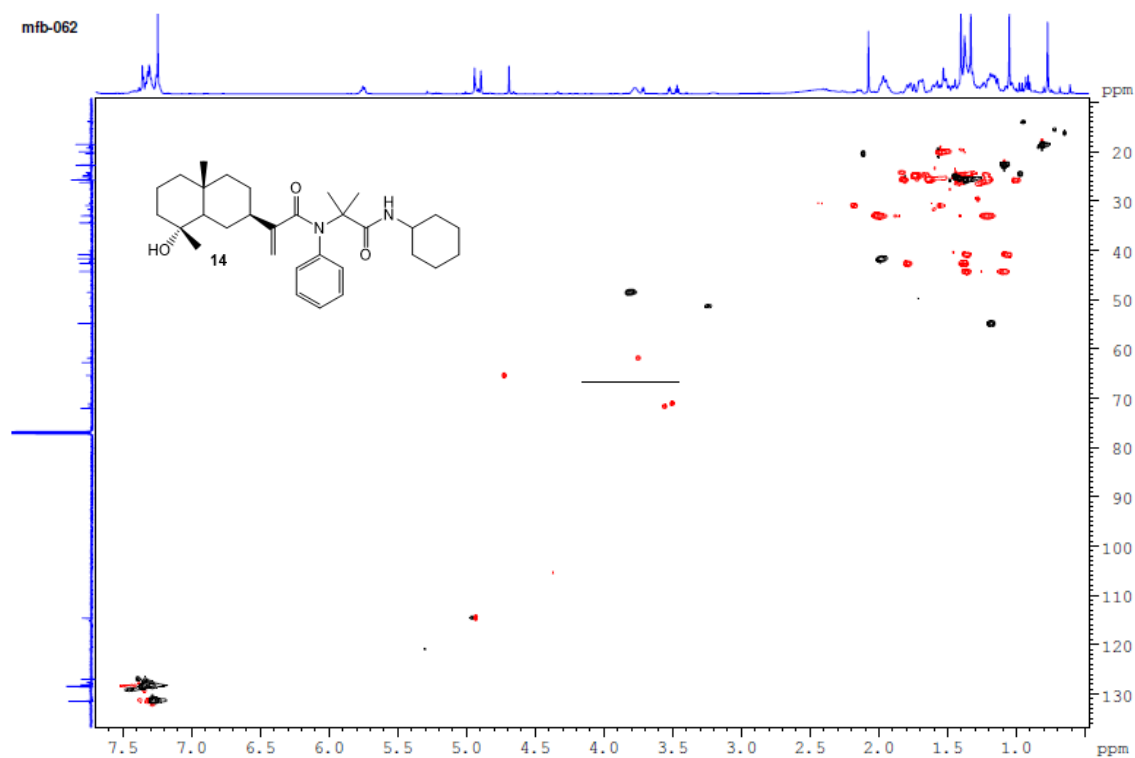

Figure S60. HSQC of 14.

mf0-062

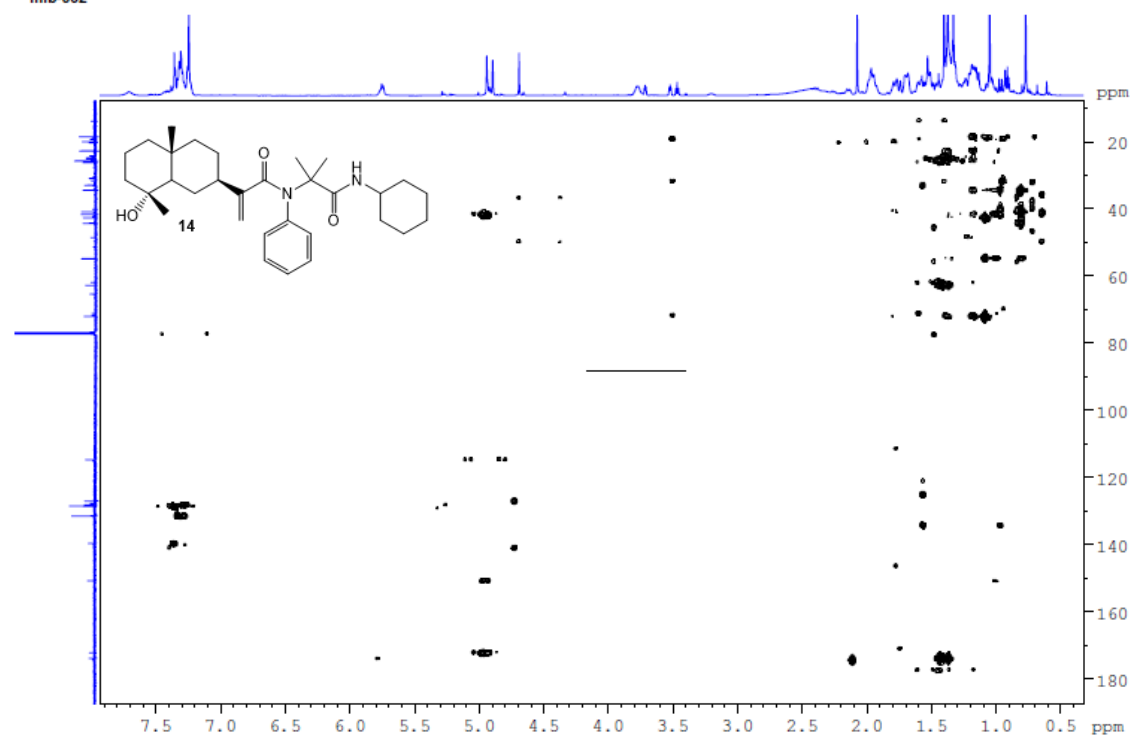

Figure S61. HMBC of 14.

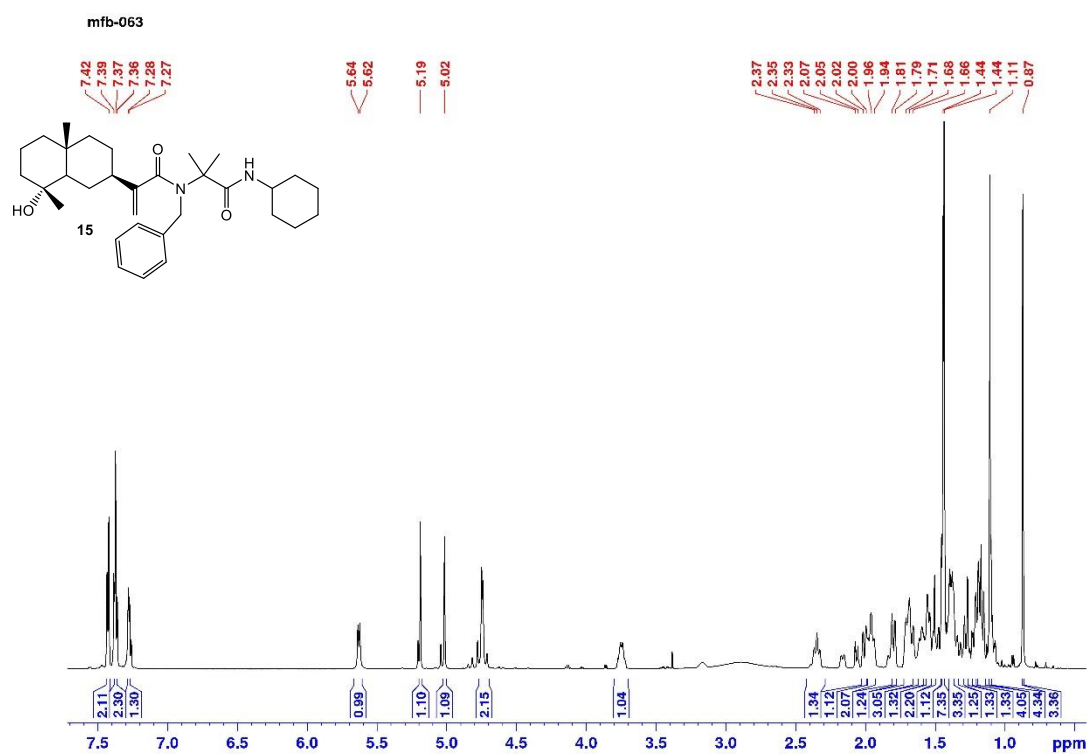

Figure S62. <sup>1</sup>H-NMR of 15.

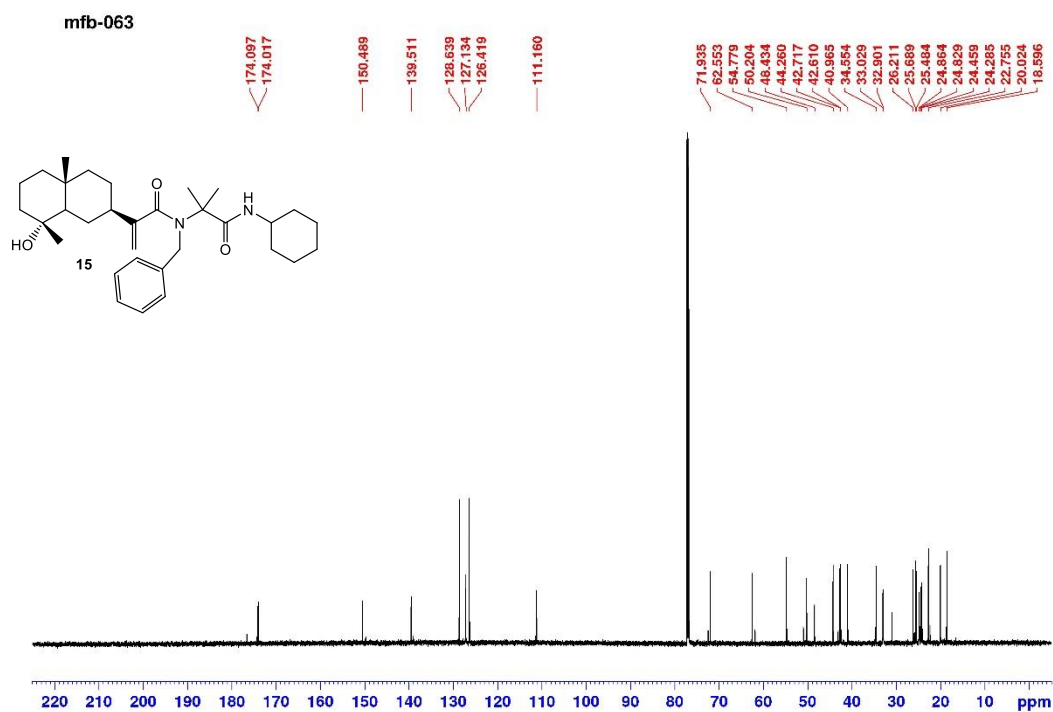

Figure S63. <sup>13</sup>C-NMR of 15.



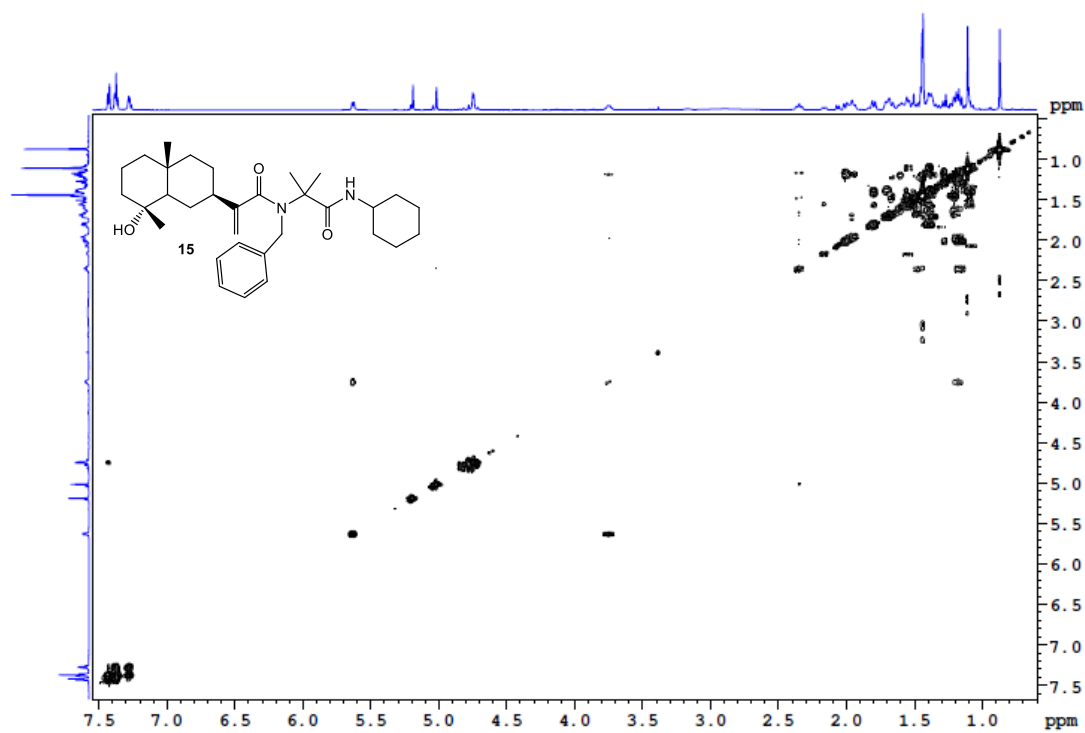

Figure S64. COSY of 15.

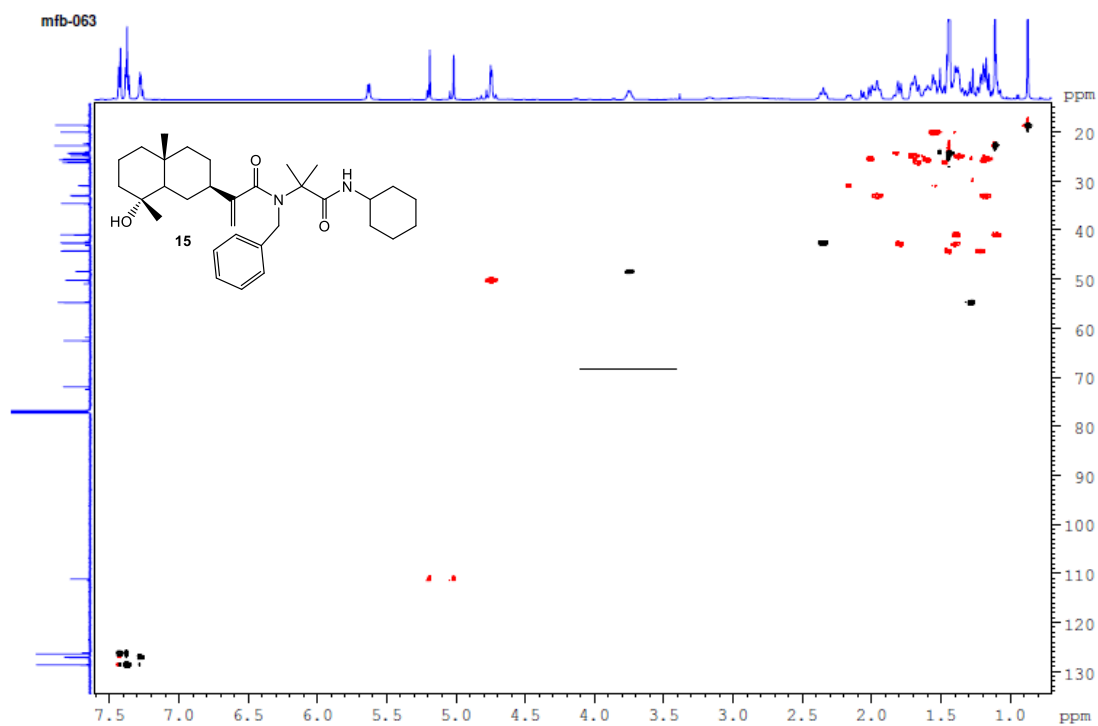

Figure S65. HSQC of 15.

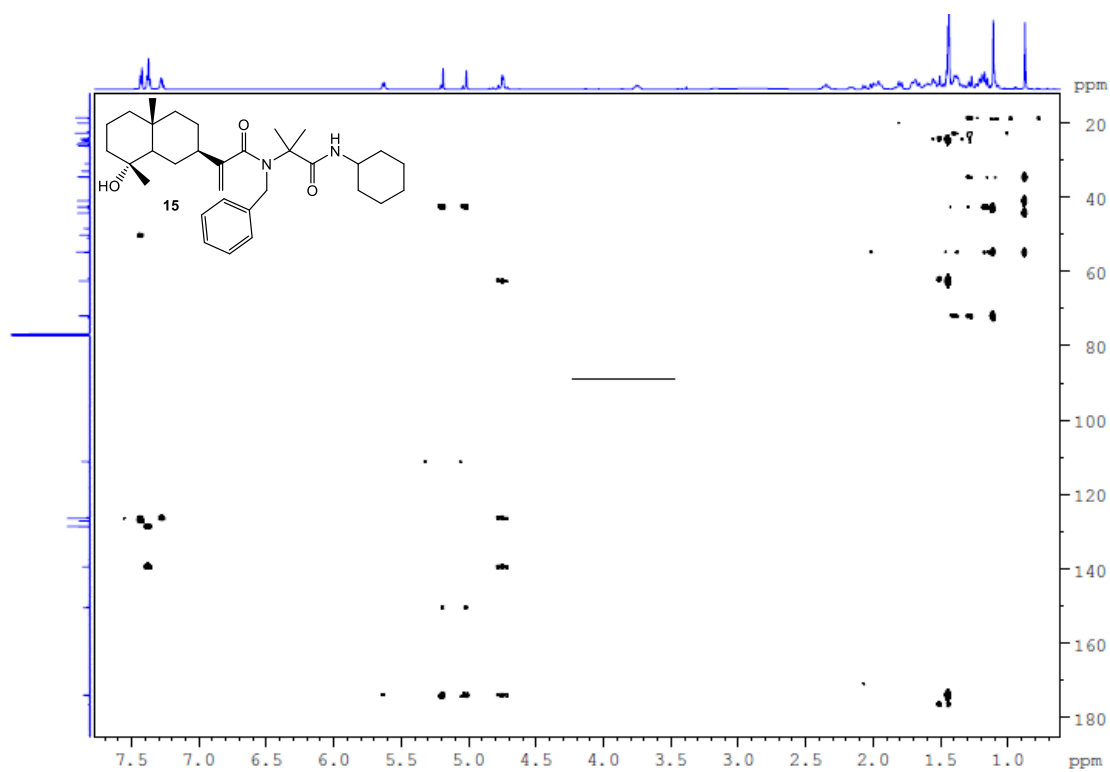

Figure S66. HMBC of 15.

#### 4. NMR spectra of Illic alcohol derivatives

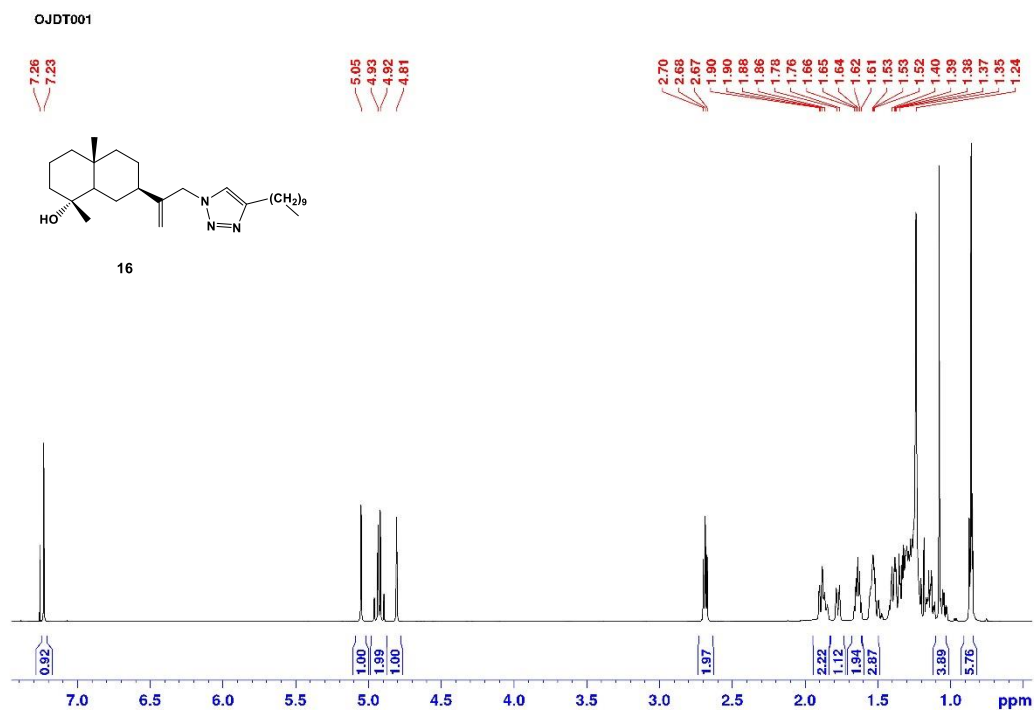

Figure S67.  $^1\text{H}$ -NMR of 16.

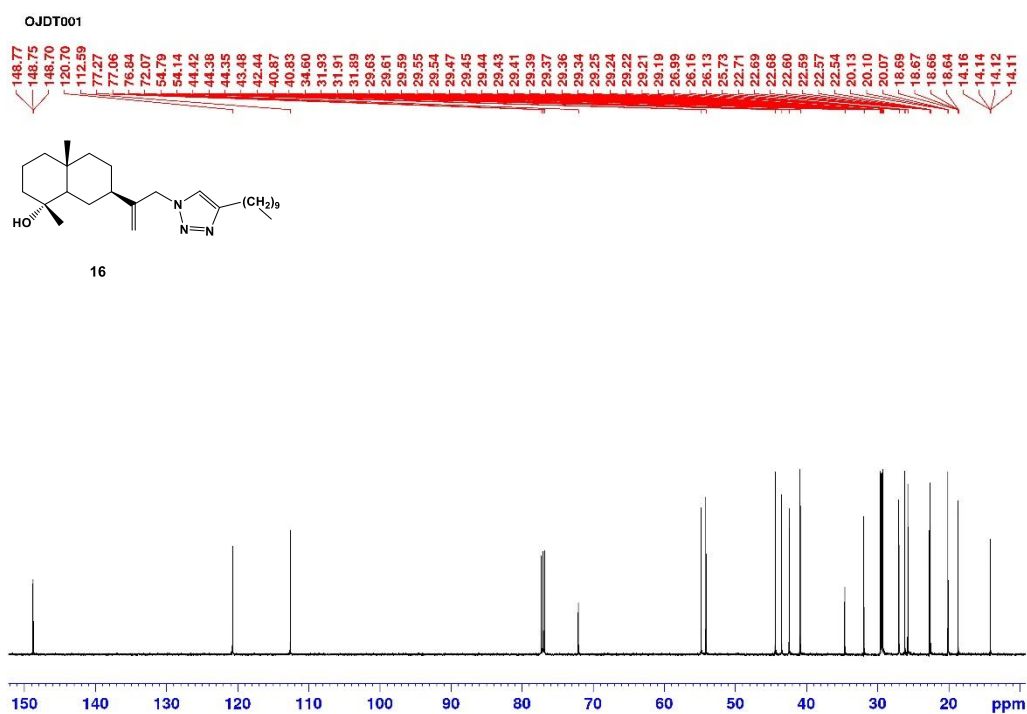

Figure S68.  $^{13}\text{C}$ -NMR of 16.

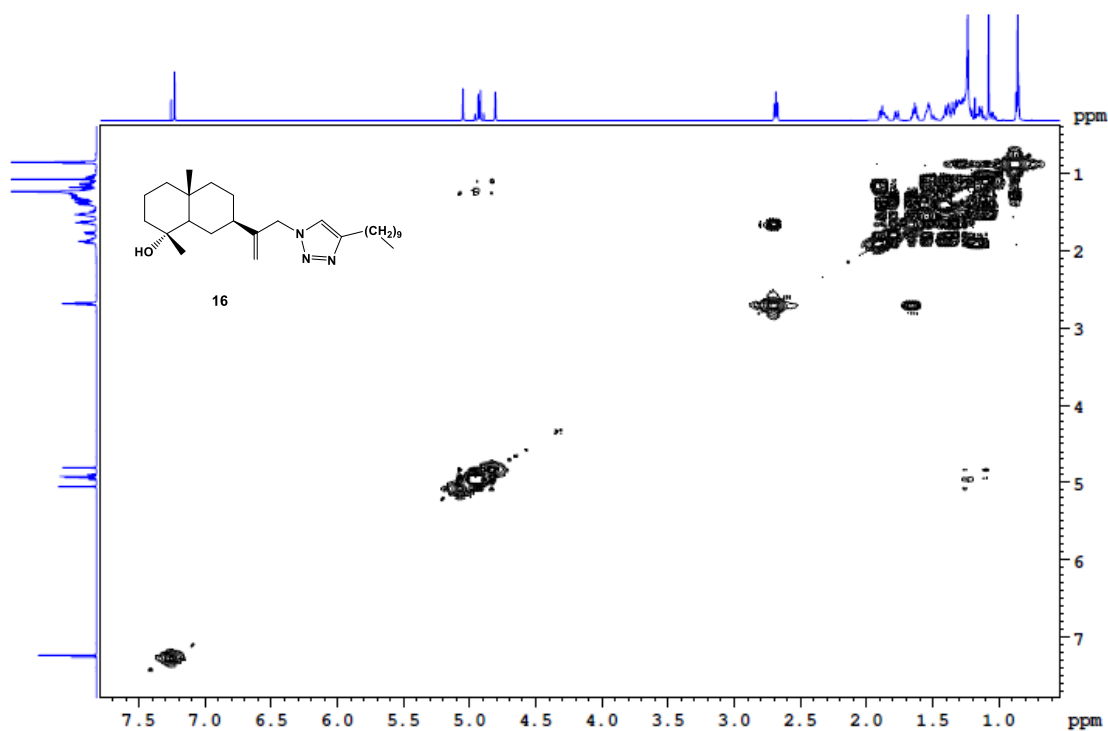

Figure S69. COSY of 16.

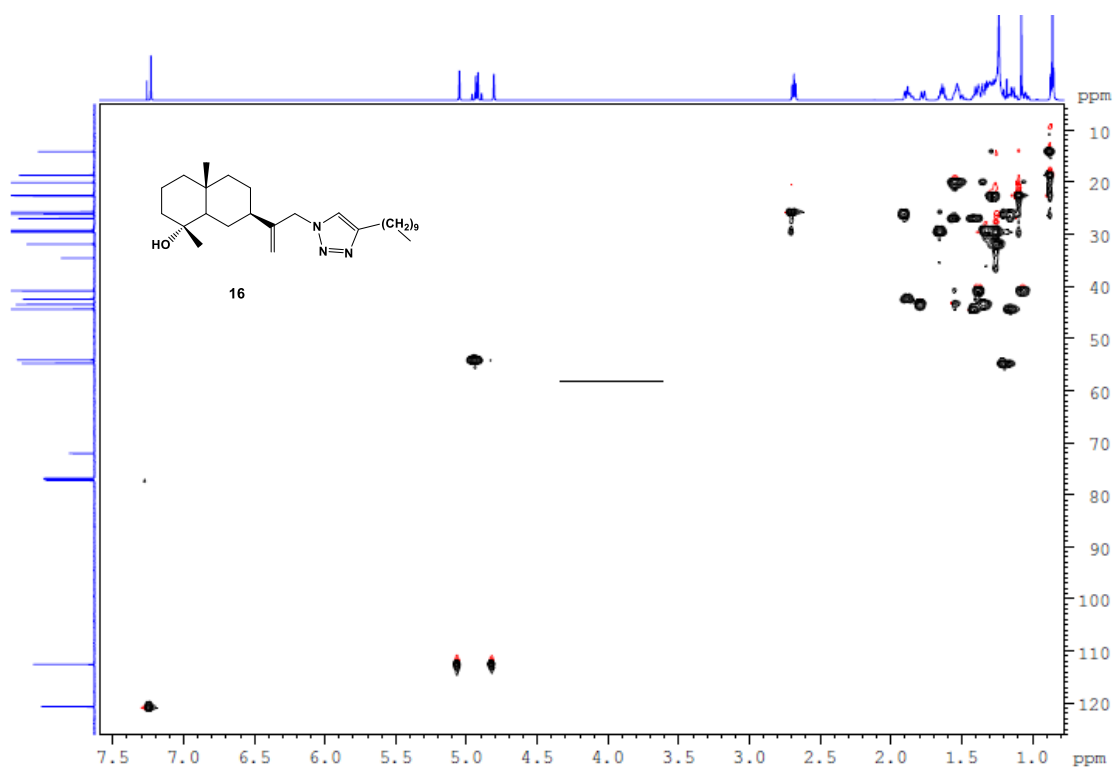

Figure S70. HSQC of 16.

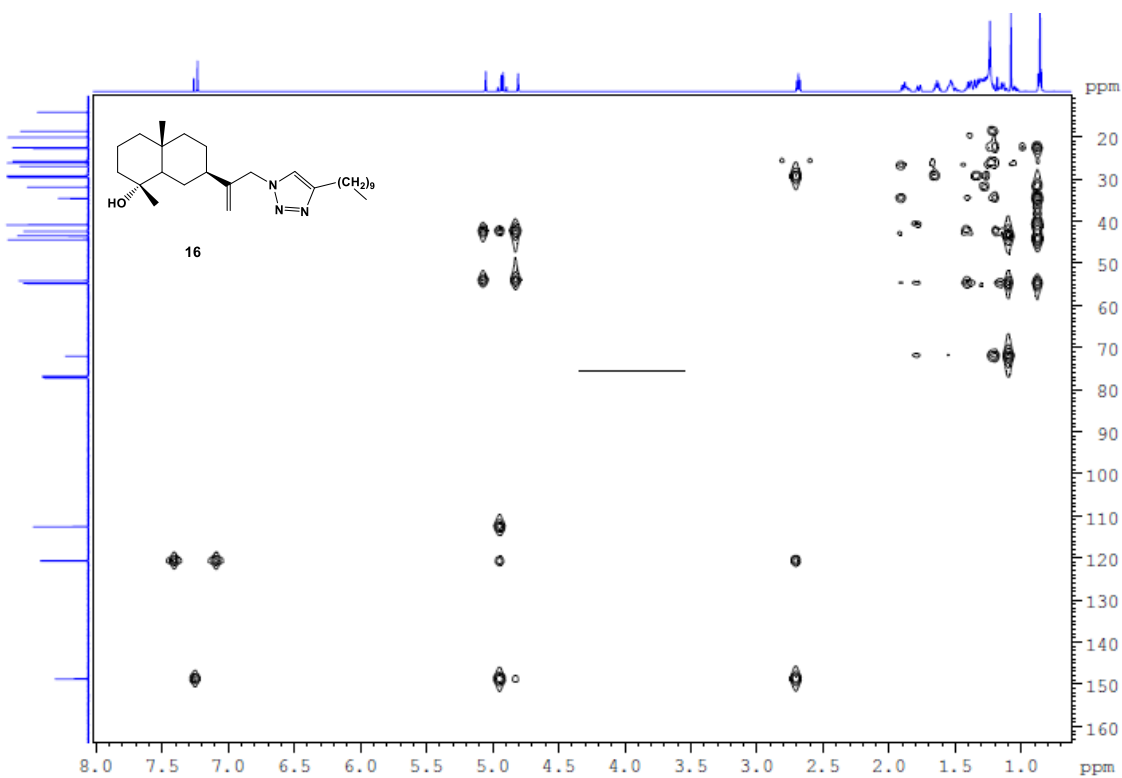

Figure S71. HMBC of 16.

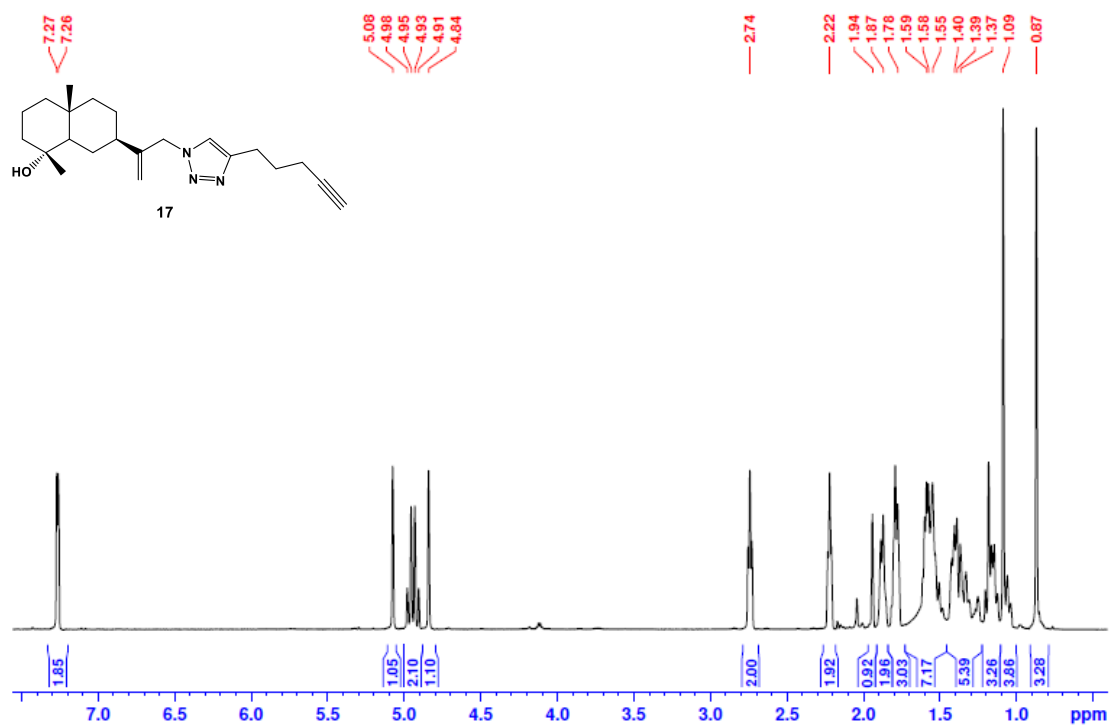

Figure S72. <sup>1</sup>H-NMR of 17.

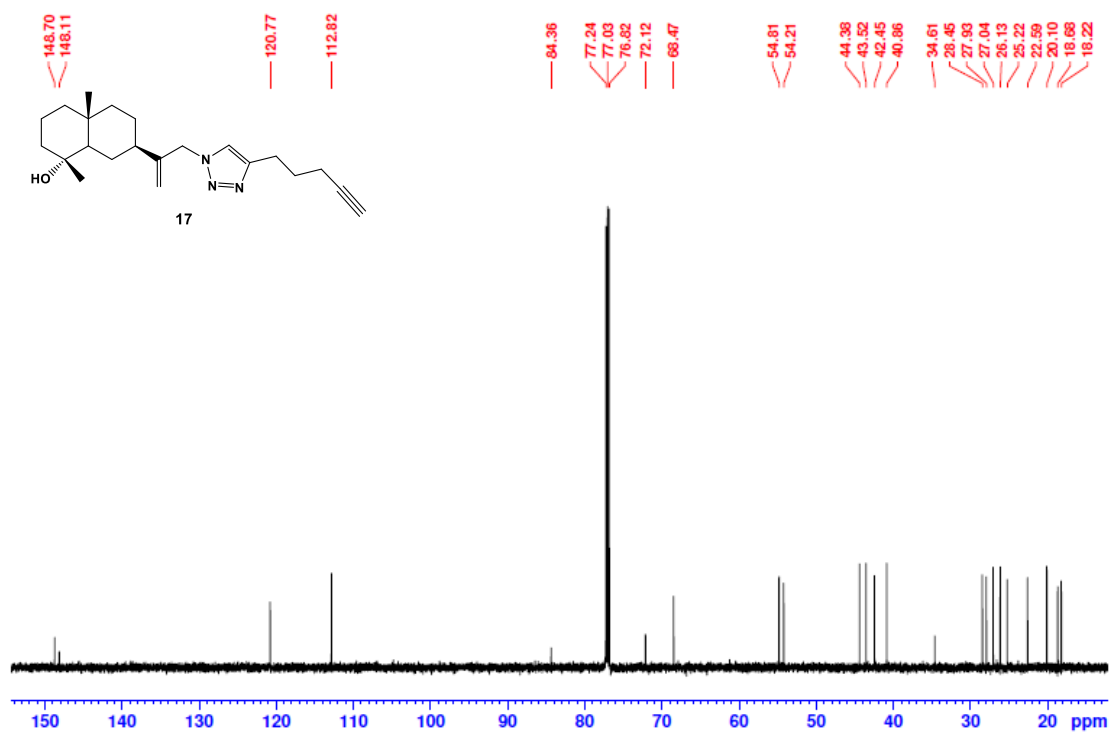

Figure S73. <sup>13</sup>C-NMR of 17.

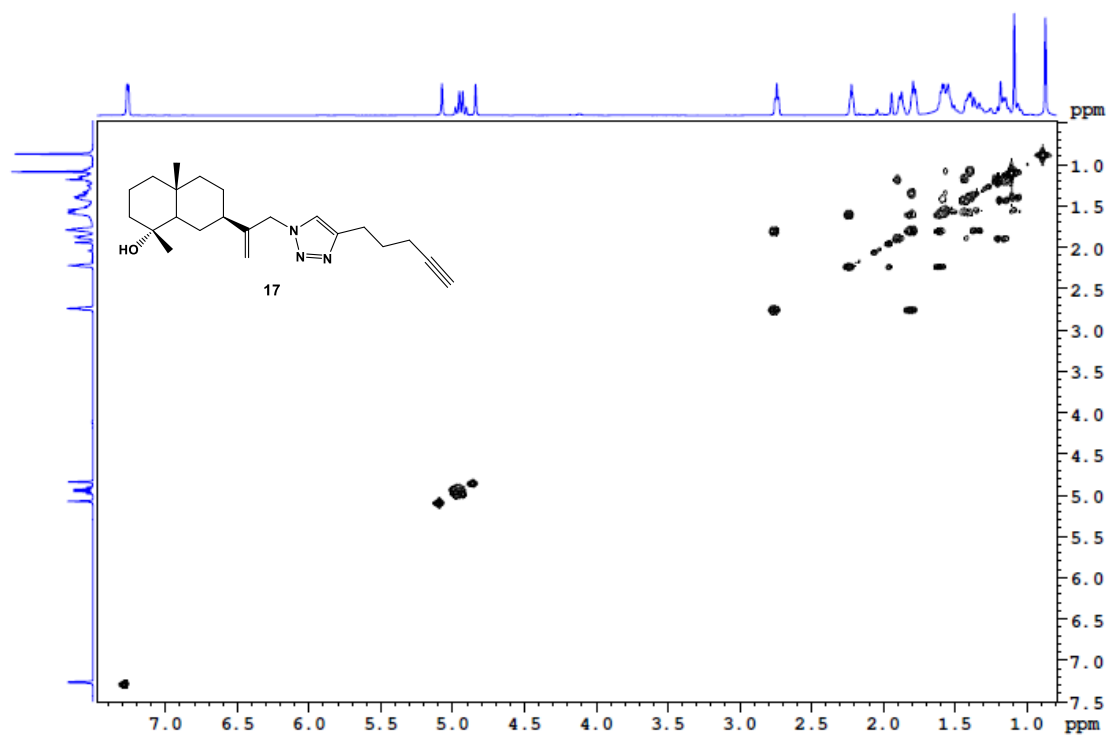

Figure S74. COSY of 17.

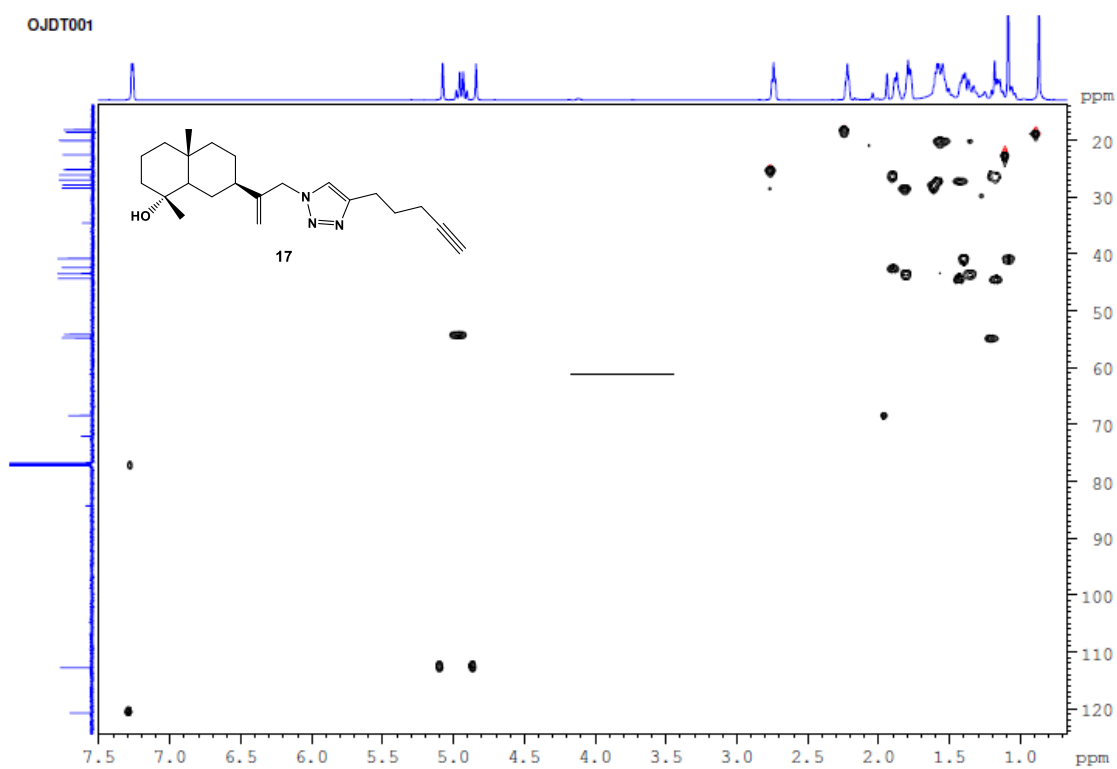

Figure S75. HSQC of 17.

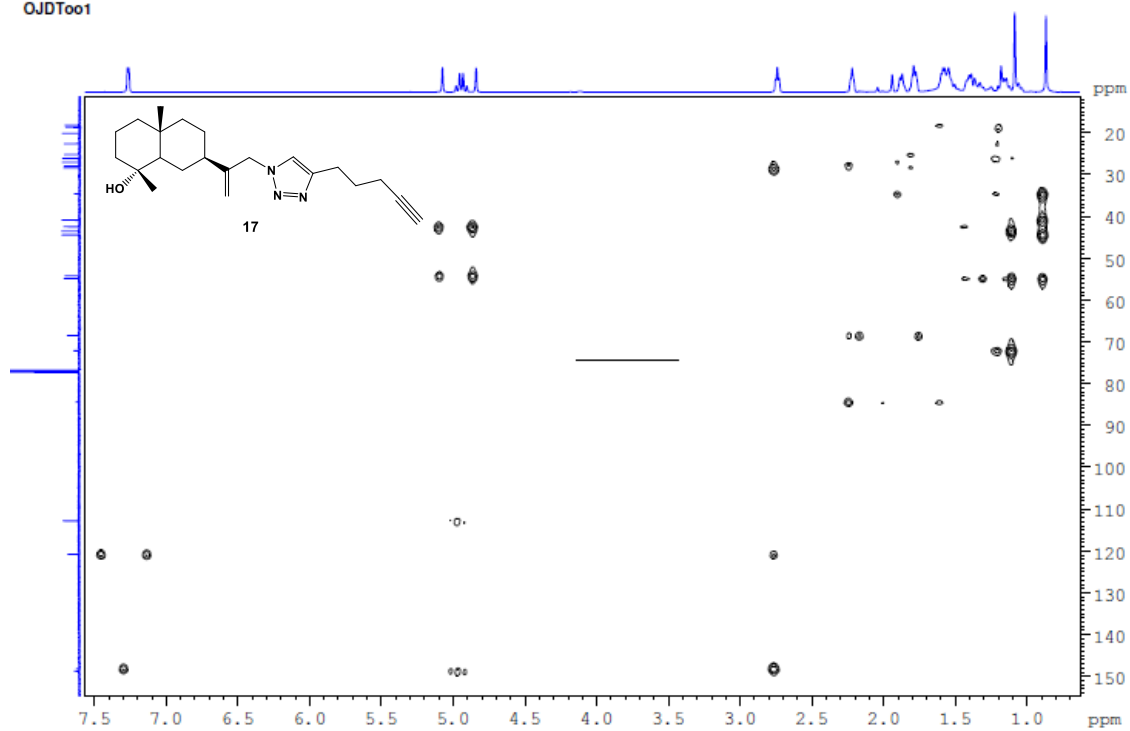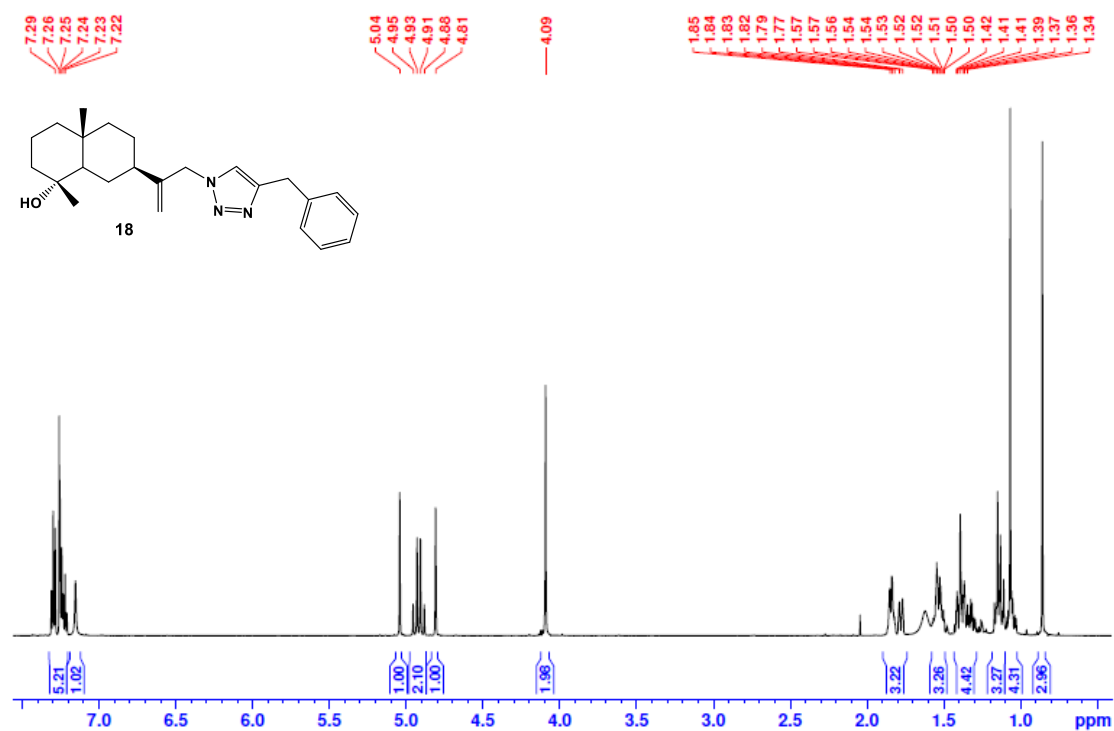

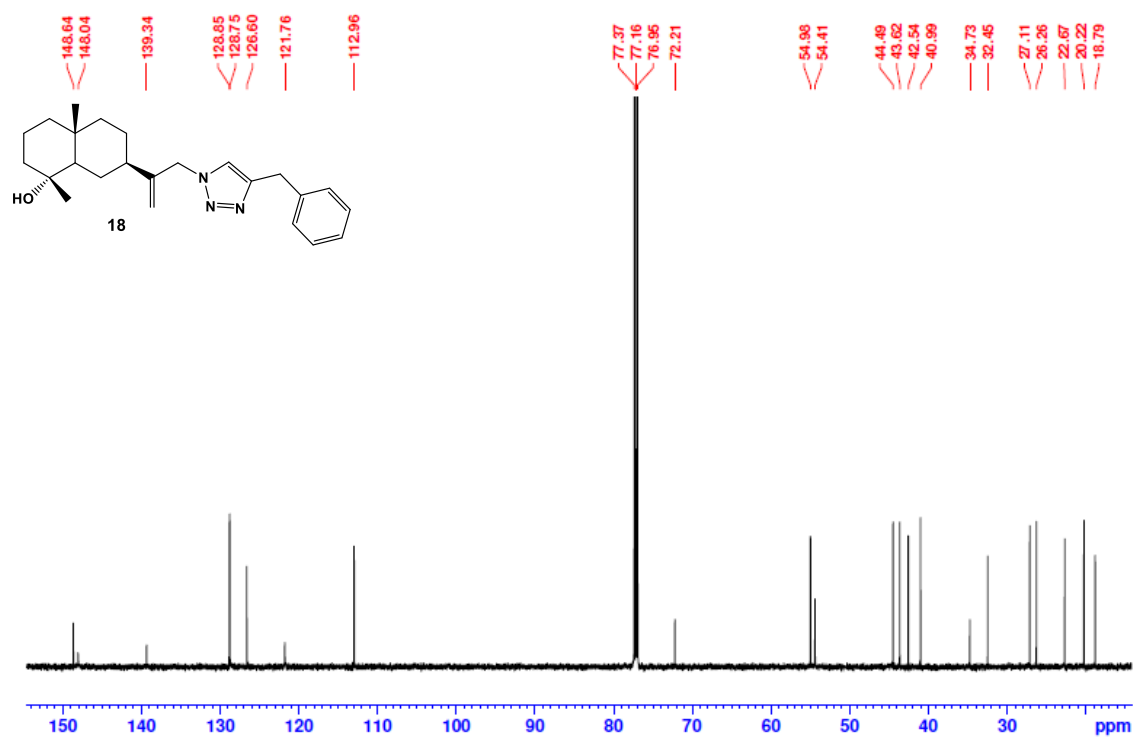

Figure S78.  $^{13}\text{C}$ -NMR of 18.

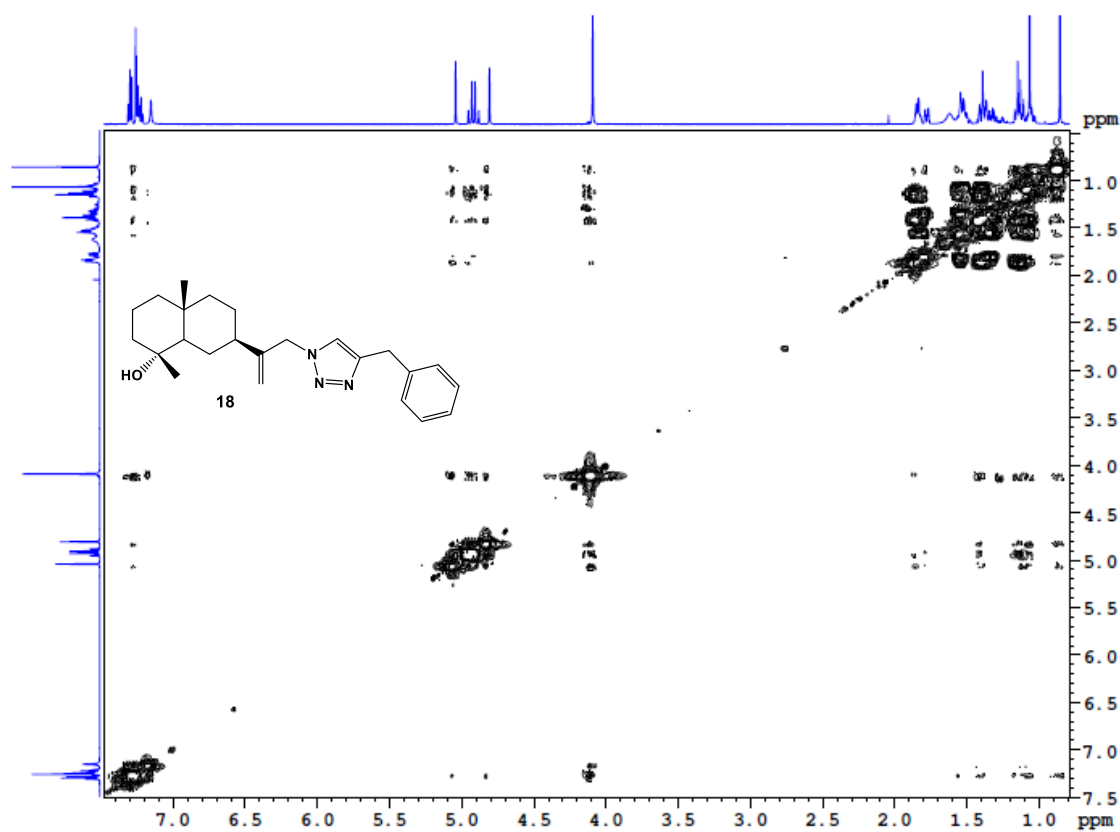

Figure S79. COSY of 18.



OJDT003

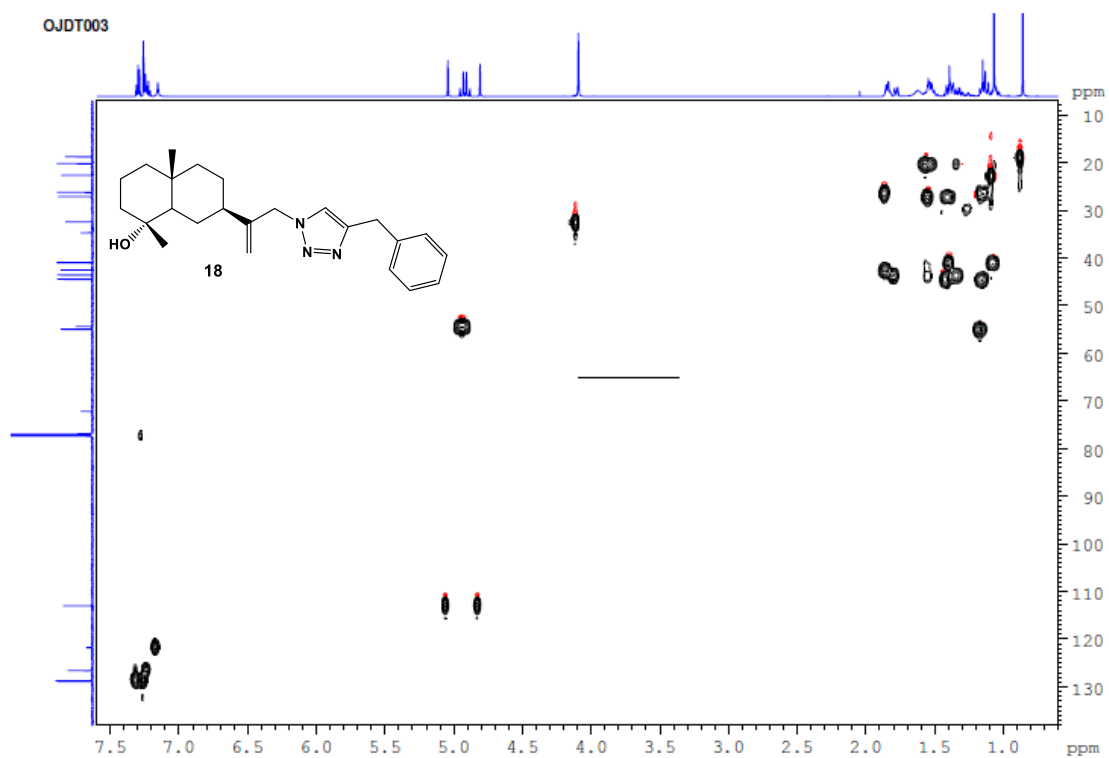

Figure S80. HSQC of 18.

OJDT003

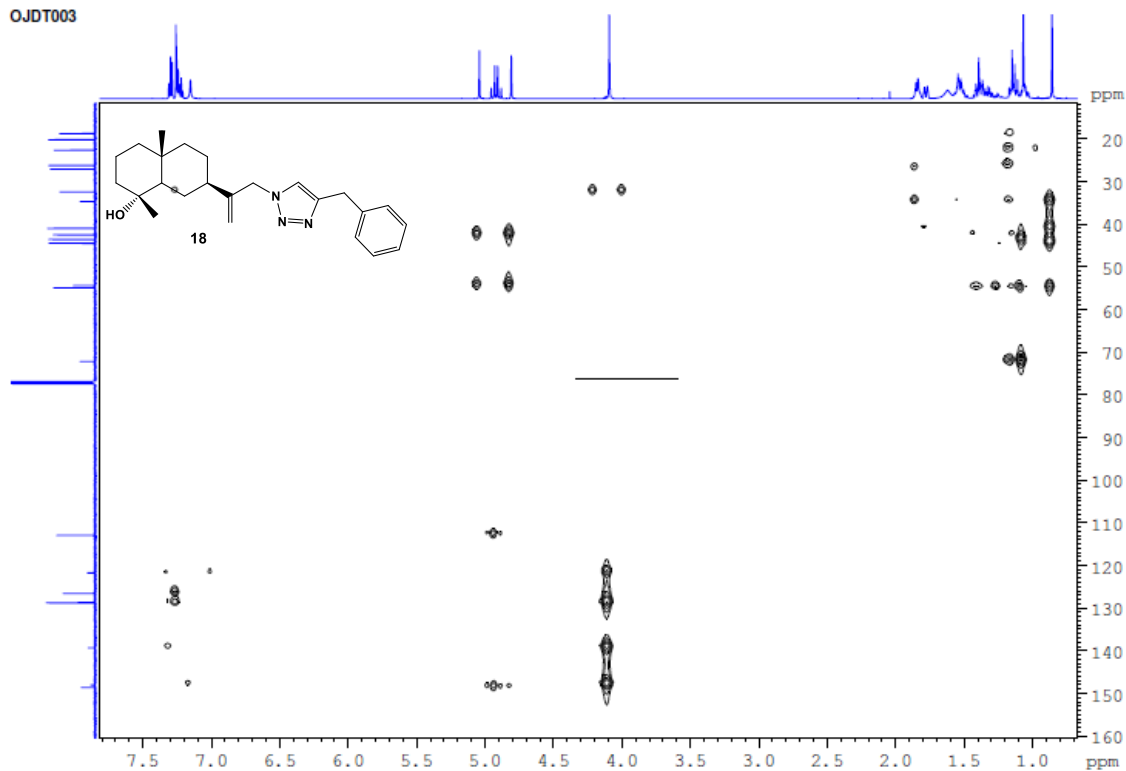

Figure S81. HMBC of 18.

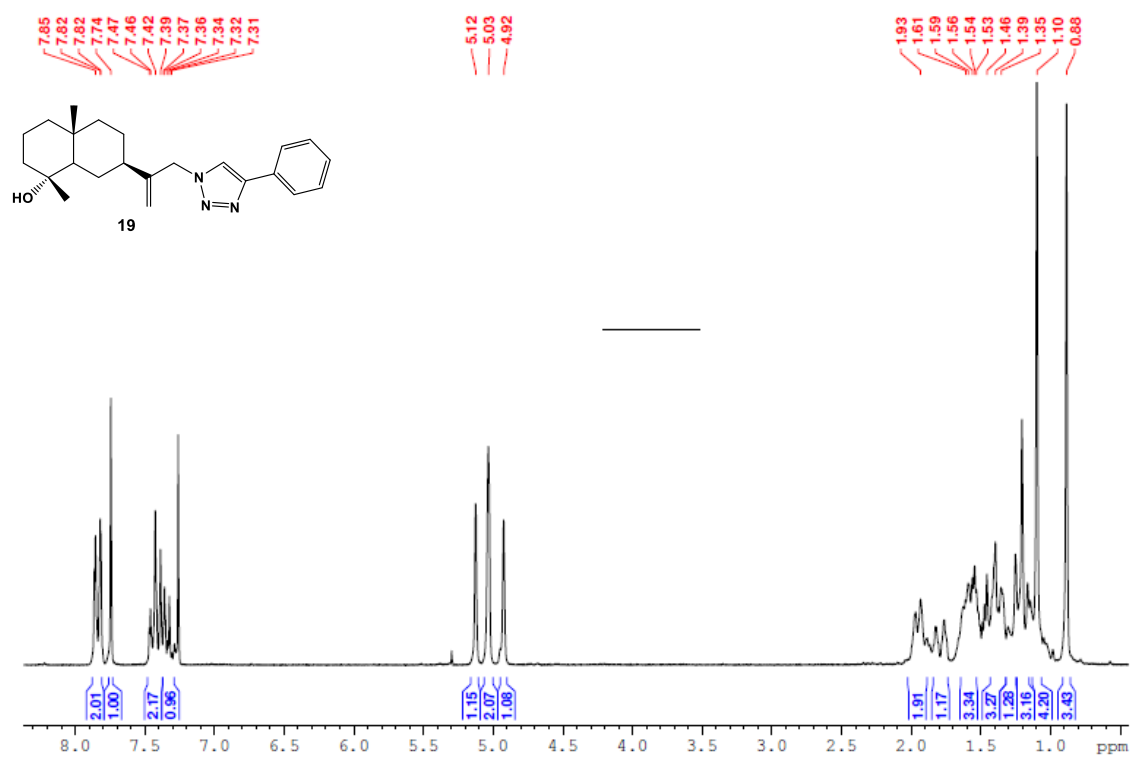

Figure S82. <sup>1</sup>H-NMR of 19.

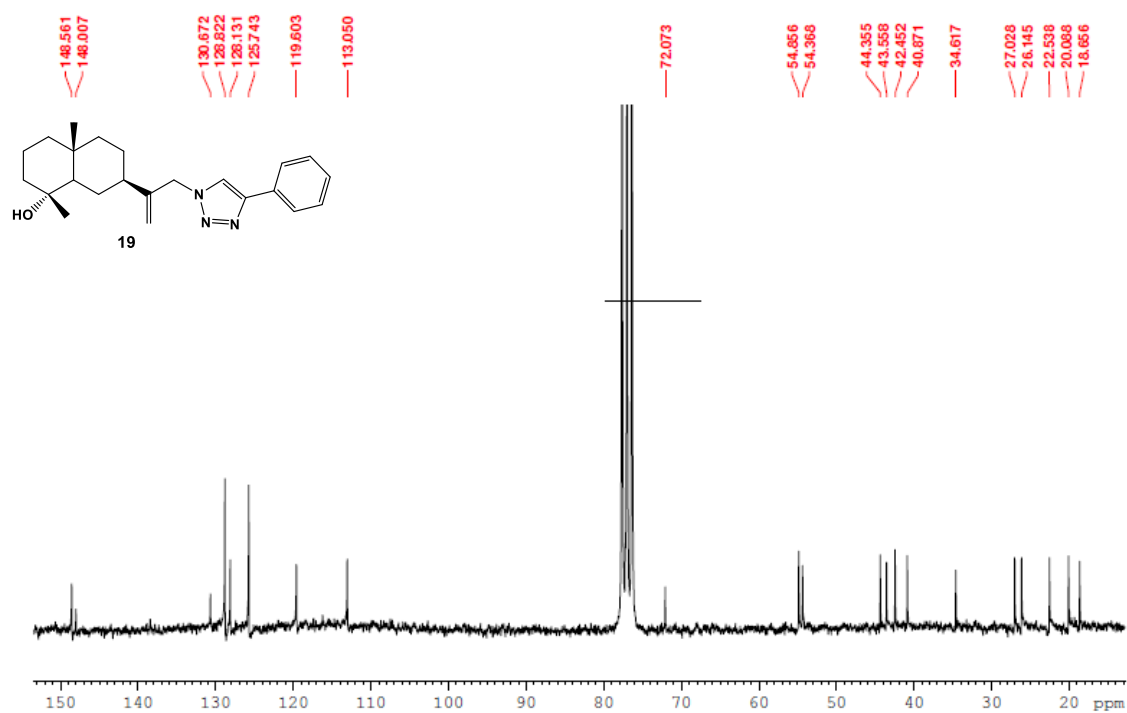

Figure S83. <sup>13</sup>C-NMR of 19.

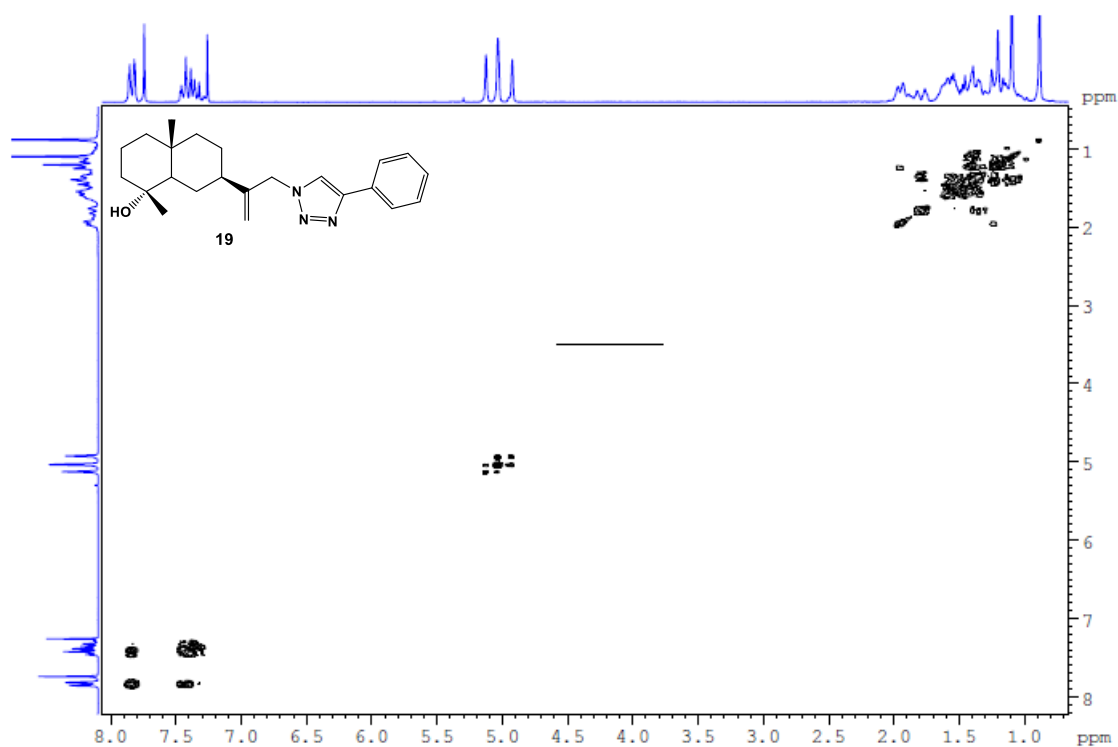

Figure S84. COSY of 19.

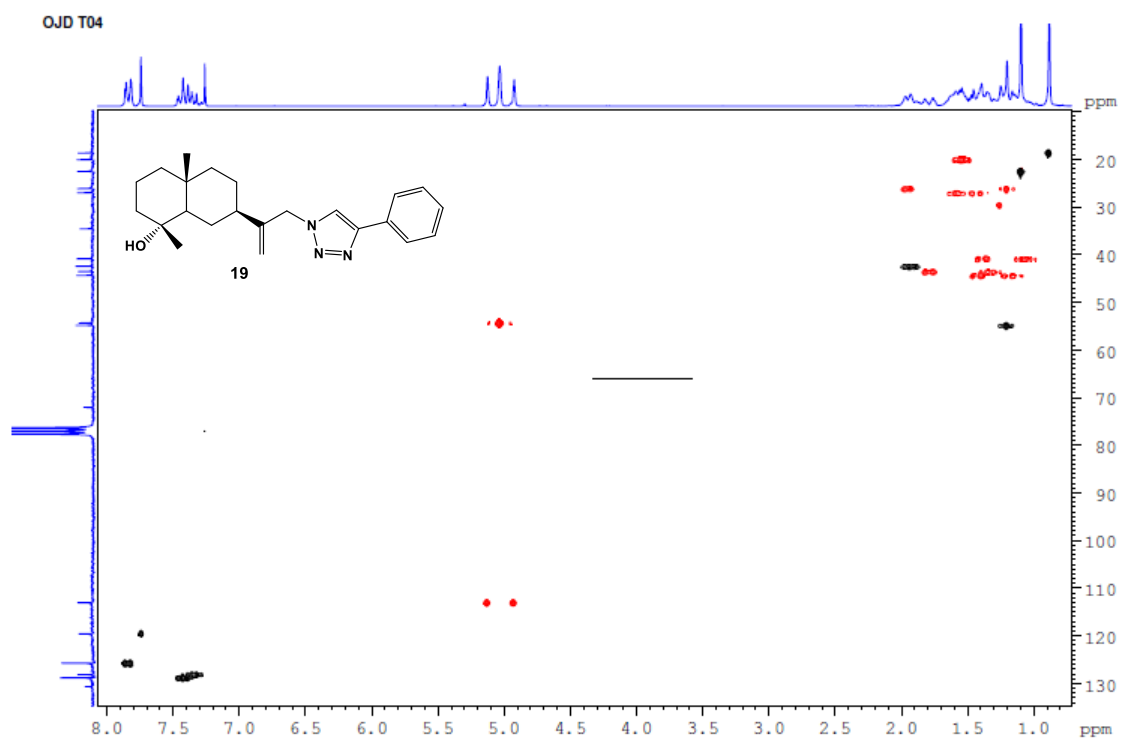

Figure S85. HSQC of 19.

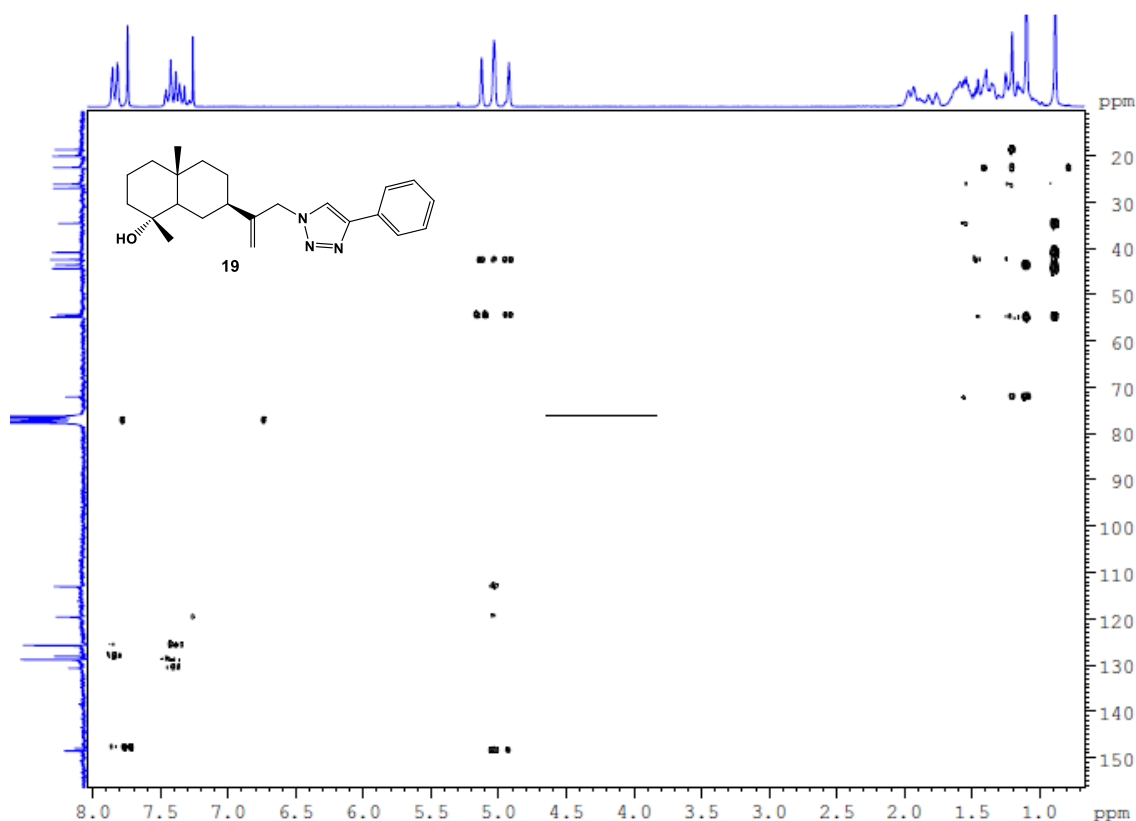

Figure S86. HMBC of 19.

## 5. HRMS-ES of compounds 1-15

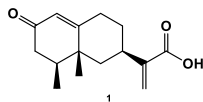

### Elemental Composition Report

Page 1

#### Multiple Mass Analysis: 3 mass(es) processed

Tolerance = 5.0 PPM / DBE: min = -1.5, max = 120.0

Element prediction: Off

Number of isotope peaks used for i-FIT = 3

Monoisotopic Mass, Even Electron Ions

1291 formula(e) evaluated with 7 results within limits (all results (up to 1000) for each mass)

Elements Used:

C: 0-120 H: 0-70 N: 0-5 O: 0-6 Na: 0-2

Oswaldo

(ESI-18) (206) Oswaldo Donadel (Acido Tessarico) 44 (1.479)

2: TOF MS ES+  
2.51e+002

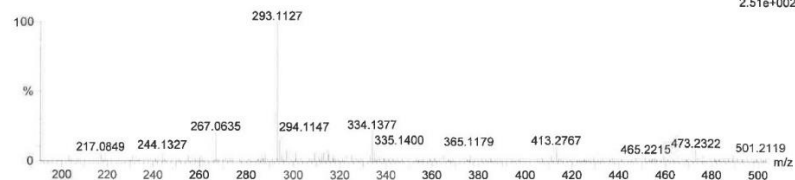

|          |        |            |      |      |      |       |              |                  |  |
|----------|--------|------------|------|------|------|-------|--------------|------------------|--|
| Minimum: | 20.00  |            |      |      |      |       |              |                  |  |
| Maximum: | 100.00 |            |      |      |      |       |              |                  |  |
| Mass     | RA     | Calc. Mass | mDa  | PPM  | DBE  | i-FIT | i-FIT (Norm) | Formula          |  |
| 267.0635 | 20.16  | 267.0633   | 0.2  | 0.7  | 8.5  | 12.7  | 0.9          | C14 H12 O4 Na    |  |
|          |        | 267.0623   | 1.2  | 4.5  | 10.5 | 13.0  | 1.2          | C13 H9 N4 Na2    |  |
|          |        | 267.0647   | -1.2 | -4.5 | 13.5 | 13.1  | 1.3          | C15 H8 N4 Na     |  |
| 293.1127 | 100.00 | 293.1130   | -0.3 | -1.0 | 5.5  | 9.6   | 1.0          | C15 H19 O3 Na2   |  |
|          |        | 293.1137   | -1.0 | -3.4 | 7.5  | 9.7   | 1.1          | C14 H17 N2 O5    |  |
|          |        | 293.1113   | 1.4  | 4.8  | 4.5  | 9.8   | 1.2          | C12 H18 N2 O5 Na |  |
| 334.1377 | 21.34  | 334.1379   | -0.2 | -0.6 | 5.5  | 15.2  | 0.0          | C14 H21 N3 O5 Na |  |

Figure S87. HRMS-ES of 1.

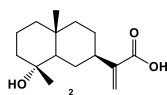

# Elemental Composition Report

Page 1

## Multiple Mass Analysis: 2 mass(es) processed

Tolerance = 5.0 PPM / DBE: min = -1.5, max = 120.0  
 Element prediction: Off  
 Number of isotope peaks used for i-FIT = 3

Monoisotopic Mass, Even Electron Ions

824 formula(e) evaluated with 4 results within limits (all results (up to 1000) for each mass)

Elements Used:

C: 0-120 H: 0-70 N: 0-5 O: 0-6 Na: 0-2

Oswaldo

(ESI-18) (204) Oswaldo Donadel (Ac Illico) 16 (0.661)

1: TOF MS ES+  
1.62e+004

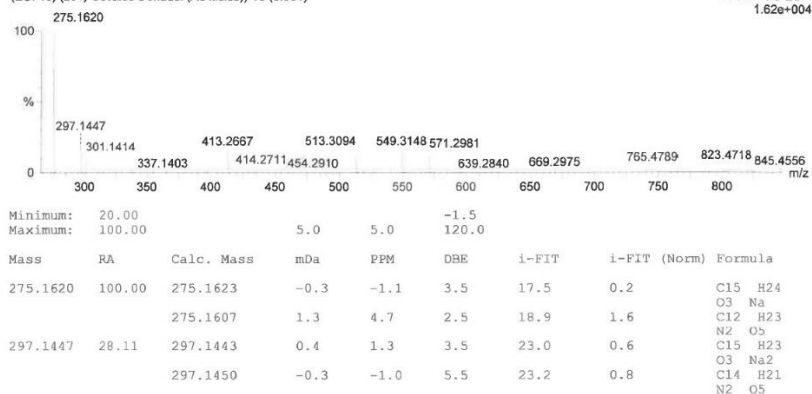

Figure S88. HRMS-ES of 2.

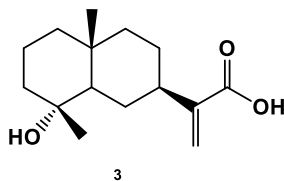

# Elemental Composition Report

Page 1

Tolerance = 5.0 PPM / DBE: min = -1.5, max = 120.0

Element prediction: Off

Number of isotope peaks used for i-FIT = 3

Monoisotopic Mass, Even Electron Ions

372 formula(e) evaluated with 1 results within limits (all results (up to 1000) for each mass)

Elements Used:

C: 0-120 H: 0-70 N: 0-5 O: 0-6 Na: 0-2

Oswaldo

(ESI-18) (205) Oswaldo Donadel (Alcohol Illico) 19 (0.801)

1: TOF MS ES+  
5.69e+003

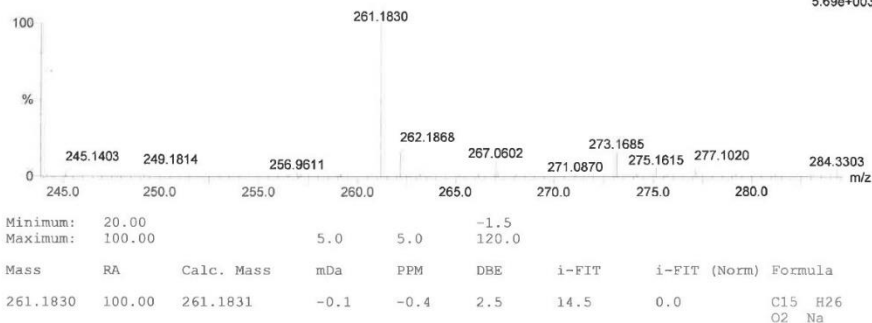

Figure S89. HRMS-ES of 3.

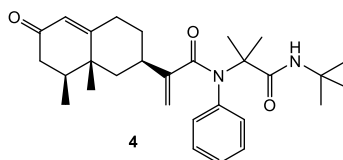

## Elemental Composition Report

Page 1

Tolerance = 5.0 PPM / DBE: min = -10.0, max = 1000.0  
 Element prediction: Off  
 Number of isotope peaks used for i-FIT = 2

Monoisotopic Mass, Even Electron Ions  
 1004 formula(e) evaluated with 4 results within limits (all results (up to 1000) for each mass)  
 Elements Used:  
 C: 0-70 H: 0-100 N: 0-4 O: 0-15 Na: 0-1  
 ESI (16-798) Maria F B (MFB-054) 116 (4.052)

2: TOF MS ES+  
 6.58e+001

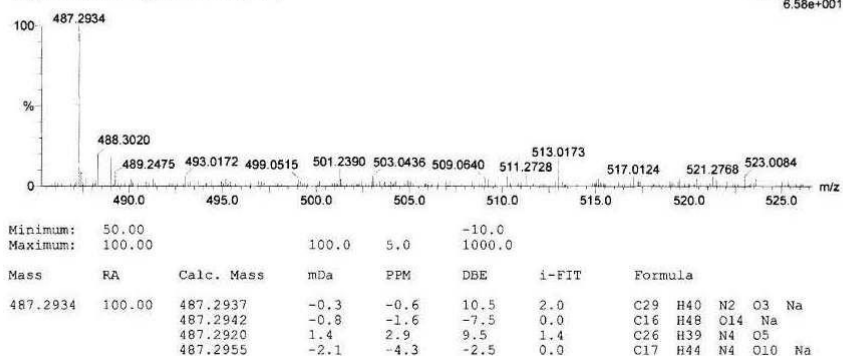

Figure S90. HRMS-ES of 4.

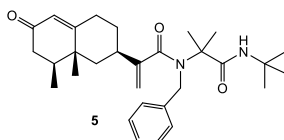

## Elemental Composition Report

Page 1

## Multiple Mass Analysis: 2 mass(es) processed

Tolerance = 5.0 PPM / DBE: min = -10.0, max = 1000.0  
 Element prediction: Off  
 Number of isotope peaks used for i-FIT = 2

Monoisotopic Mass, Even Electron Ions  
 1304 formula(e) evaluated with 5 results within limits (all results (up to 1000) for each mass)  
 Elements Used:  
 C: 0-70 H: 0-100 N: 0-2 O: 0-16 Na: 0-1  
 ESI (16-867) Maria F (MFB-055A) 61 (2.128)

2: TOF MS ES+  
 1.10e+003

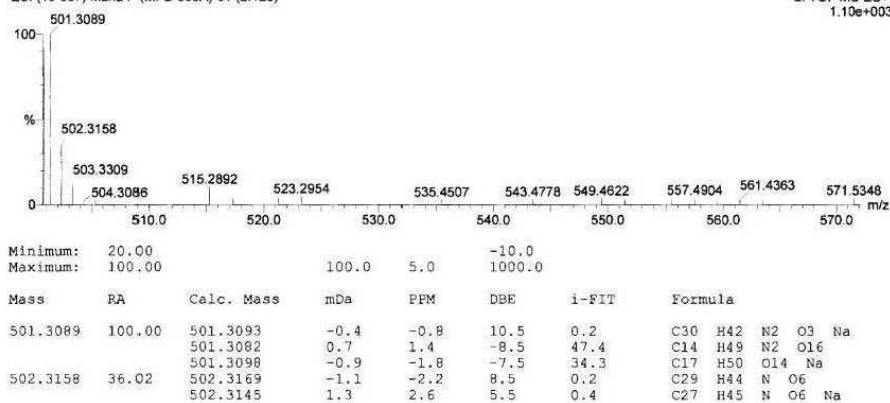

Figure S91. HRMS-ES of 5.

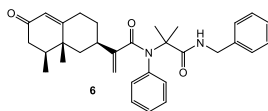

## Elemental Composition Report

Page 1

## Multiple Mass Analysis: 2 mass(es) processed

Tolerance = 5.0 PPM / DBE: min = -10.0, max = 1000.0

Element prediction: Off

Number of isotope peaks used for i-FIT = 2

Monoisotopic Mass, Even Electron Ions

1355 formula(e) evaluated with 5 results within limits (all results (up to 1000) for each mass)

Elements Used:

C: 0-70 H: 0-100 N: 0-2 O: 0-16 Na: 0-1

ESI (16-866) Maria F (MFB-061) 130 (4.528)

2: TOF MS ES+  
5.11e+003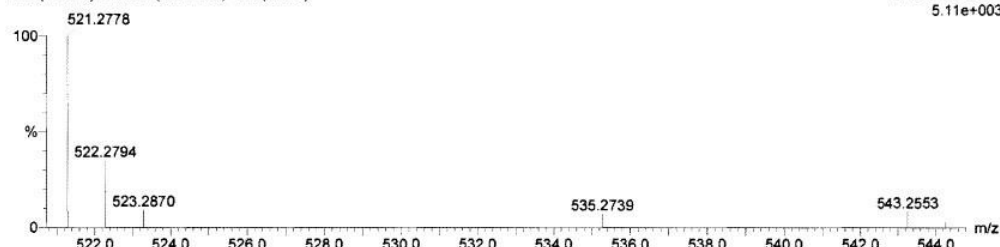

|          |        |            |       |      |      |       |         |     |        |     |    |
|----------|--------|------------|-------|------|------|-------|---------|-----|--------|-----|----|
| Minimum: | 20.00  |            |       |      |      |       |         |     | -10.0  |     |    |
| Maximum: | 100.00 |            | 100.0 | 5.0  |      |       |         |     | 1000.0 |     |    |
| Mass     | RA     | Calc. Mass | mDa   | PPM  | DBE  | i-FIT | Formula |     |        |     |    |
| 521.2778 | 100.00 | 521.2780   | -0.2  | -0.4 | 14.5 | 2.3   | C32     | H38 | N2     | O3  | Na |
|          |        | 521.2785   | -0.7  | -1.3 | -3.5 | 101.7 | C19     | H46 | O14    |     | Na |
|          |        | 521.2769   | 0.9   | 1.7  | -4.5 | 150.6 | C16     | H45 | N2     | O16 |    |
| 522.2794 | 34.95  | 522.2797   | -0.3  | -0.6 | 21.5 | 58.3  | C38     | H36 | N      | O   |    |
|          |        | 522.2773   | 2.1   | 4.0  | 18.5 | 46.4  | C36     | H37 | N      | O   | Na |

Figure S92. HRMS-ES of 6.

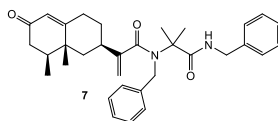

## Elemental Composition Report

Page 1

## Multiple Mass Analysis: 2 mass(es) processed

Tolerance = 5.0 PPM / DBE: min = -10.0, max = 1000.0

Element prediction: Off

Number of isotope peaks used for i-FIT = 2

Monoisotopic Mass, Even Electron Ions

1393 formula(e) evaluated with 6 results within limits (all results (up to 1000) for each mass)

Elements Used:

C: 0-70 H: 0-100 N: 0-2 O: 0-16 Na: 0-1

ESI (16-863) Maria F (MFB-060) 76 (2.653)

2: TOF MS ES+  
1.08e+003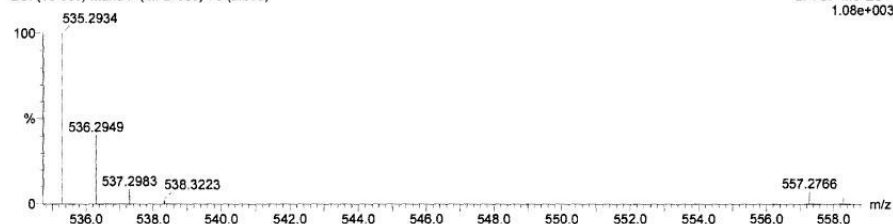

| Minimum: | 20.00  |            |       |      |      |       |         | -10.0  |     |     |    |
|----------|--------|------------|-------|------|------|-------|---------|--------|-----|-----|----|
| Maximum: | 100.00 |            | 100.0 | 5.0  |      |       |         | 1000.0 |     |     |    |
| Mass     | RA     | Calc. Mass | mDa   | PPM  | DBE  | i-FIT | Formula |        |     |     |    |
| 535.2934 | 100.00 | 535.2937   | -0.3  | -0.6 | 14.5 | 0.6   | C33     | H40    | N2  | O3  | Na |
|          |        | 535.2942   | -0.8  | -1.5 | -3.5 | 34.3  | C20     | H48    | O14 |     | Na |
|          |        | 535.2926   | 0.8   | 1.5  | -4.5 | 46.4  | C17     | H47    | N2  | O16 |    |
|          |        | 535.2961   | -2.7  | -5.0 | 17.5 | 0.2   | C35     | H39    | N2  | O3  |    |
| 536.2949 | 40.62  | 536.2953   | -0.4  | -0.7 | 21.5 | 26.9  | C39     | H38    | N   | O   |    |
|          |        | 536.2929   | 2.0   | 3.7  | 18.5 | 22.9  | C37     | H39    | N   | O   | Na |

Figure S93. HRMS-ES of 7.

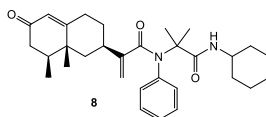

## Elemental Composition Report

Page 1

## Multiple Mass Analysis: 2 mass(es) processed

Tolerance = 5.0 PPM / DBE: min = -1.5, max = 120.0

Element prediction: Off

Number of isotope peaks used for i-FIT = 3

Monoisotopic Mass, Even Electron Ions

1459 formula(e) evaluated with 7 results within limits (all results (up to 1000) for each mass)

Elements Used:

C: 0-120 H: 0-70 N: 0-5 O: 0-6 Na: 0-2

Osvaldo

(ESI-18) (202) Osvaldo Donadel ( MFB 79) 50 (1.688) Cm (50:59)

2: TOF MS ES+  
2.20e+005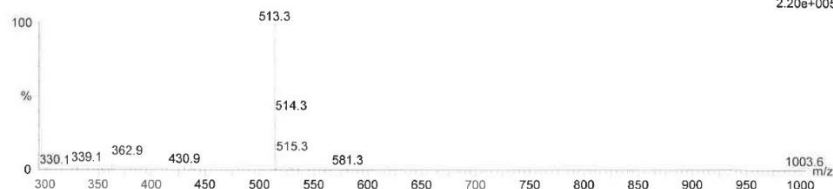

|          |        |            |      |      |      |       |              |          |  |
|----------|--------|------------|------|------|------|-------|--------------|----------|--|
| Minimum: | 20.00  |            |      |      |      |       |              |          |  |
| Maximum: | 100.00 |            |      |      |      |       |              |          |  |
| Mass     | RA     | Calc. Mass | mDa  | PPM  | DBE  | i-FIT | i-FIT (Norm) | Formula  |  |
| 513.3099 | 100.00 | 513.3077   | 2.2  | 4.3  | 10.5 | 20.7  | 0.1          | C28 H41  |  |
|          |        | 513.3093   | 0.6  | 1.2  | 11.5 | 22.6  | 2.0          | R4 O5    |  |
|          |        | 513.3117   | -1.8 | -3.5 | 14.5 | 27.0  | 6.4          | C31 H42  |  |
|          |        | 513.3109   | -1.0 | -1.9 | 12.5 | 27.0  | 6.5          | N2 O3 Na |  |
|          |        | 514.3086   | 1.3  | 2.5  | 15.5 | 34.5  | 0.6          | C33 H41  |  |
|          |        | 514.3110   | -1.1 | -2.1 | 18.5 | 35.3  | 1.3          | N2 O3    |  |
|          |        | 514.3121   | -2.2 | -4.3 | 3.5  | 35.8  | 1.8          | C34 H43  |  |
|          |        |            |      |      |      |       |              | O Na2    |  |
|          |        |            |      |      |      |       |              | C35 H41  |  |
|          |        |            |      |      |      |       |              | N O Na   |  |
|          |        |            |      |      |      |       |              | C37 H40  |  |
|          |        |            |      |      |      |       |              | N O      |  |
|          |        |            |      |      |      |       |              | C26 H46  |  |
|          |        |            |      |      |      |       |              | N O6 Na2 |  |

Figure S94. HRMS-ES of 8.

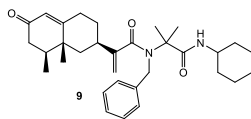

## Elemental Composition Report

Page 1

## Multiple Mass Analysis: 2 mass(es) processed

Tolerance = 5.0 PPM / DBE: min = -1.5, max = 120.0

Element prediction: Off

Number of isotope peaks used for i-FIT = 3

Monoisotopic Mass, Even Electron Ions

1477 formula(e) evaluated with 9 results within limits (all results (up to 1000) for each mass)

Elements Used:

C: 0-120 H: 0-70 N: 0-5 O: 0-6 Na: 0-2

Osvaldo

(ESI-18) (203) Osvaldo Donadel ( MFB 76) 36 (1.199)

2: TOF MS ES+  
1.83e+004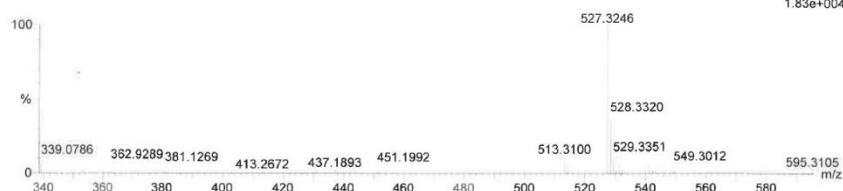

|          |        |            |      |      |      |       |              |           |  |
|----------|--------|------------|------|------|------|-------|--------------|-----------|--|
| Minimum: | 20.00  |            |      |      |      |       |              |           |  |
| Maximum: | 100.00 |            |      |      |      |       |              |           |  |
| Mass     | RA     | Calc. Mass | mDa  | PPM  | DBE  | i-FIT | i-FIT (Norm) | Formula   |  |
| 527.3246 | 100.00 | 527.3250   | -0.4 | -0.8 | 11.5 | 18.2  | 0.6          | C32 H44   |  |
|          |        | 527.3266   | -2.0 | -3.8 | 12.5 | 19.1  | 1.6          | N2 O3 Na  |  |
|          |        | 527.3233   | 1.3  | 2.5  | 10.5 | 19.3  | 1.7          | C35 H45   |  |
|          |        | 527.3226   | 2.0  | 3.8  | 8.5  | 20.0  | 2.5          | O Na2     |  |
|          |        | 528.3314   | 0.6  | 1.1  | 11.5 | 16.1  | 1.1          | C29 H43   |  |
|          |        | 528.3325   | -0.5 | -0.9 | 9.5  | 16.1  | 1.1          | N4 O5     |  |
|          |        | 528.3301   | 1.9  | 3.6  | 6.5  | 16.8  | 1.8          | C30 H45   |  |
|          |        | 528.3331   | -1.1 | -2.1 | 12.5 | 17.0  | 2.0          | N2 O3 Na2 |  |
|          |        | 528.3339   | -1.9 | -3.6 | 14.5 | 18.0  | 3.0          | C30 H43   |  |
|          |        |            |      |      |      |       |              | N5 O2 Na  |  |
|          |        |            |      |      |      |       |              | C31 H46   |  |
|          |        |            |      |      |      |       |              | N O6      |  |
|          |        |            |      |      |      |       |              | C29 H47   |  |
|          |        |            |      |      |      |       |              | N O6 Na   |  |
|          |        |            |      |      |      |       |              | C33 H44   |  |
|          |        |            |      |      |      |       |              | N3 Na2    |  |
|          |        |            |      |      |      |       |              | C32 H42   |  |
|          |        |            |      |      |      |       |              | N5 O2     |  |

Figure S95. HRMS-ES of 9.



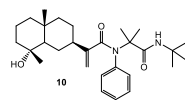

# Elemental Composition Report

Page 1

Tolerance = 5.0 PPM / DBE: min = -10.0, max = 1000.0  
 Element prediction: Off  
 Number of isotope peaks used for i-FIT = 2

Monoisotopic Mass, Even Electron Ions  
 1008 formula(e) evaluated with 5 results within limits (all results (up to 1000) for each mass)  
 Elements Used:  
 C: 0-70 H: 0-100 N: 0-4 O: 0-15 Na: 0-1  
 ESI (16-800) Mass F B (MPB-052) 81 (2.829)

2 TOF MS ES+  
 1.02e+004

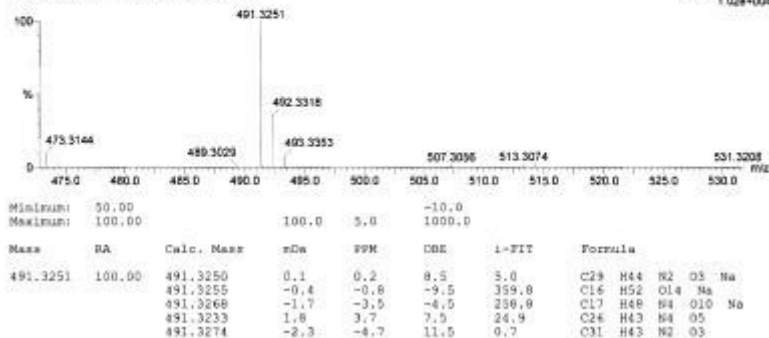

Figure S96. HRMS-ES of 10.

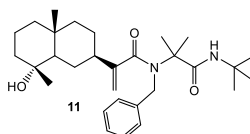

# Elemental Composition Report

Page 1

Tolerance = 5.0 PPM / DBE: min = -10.0, max = 1000.0  
 Element prediction: Off  
 Number of isotope peaks used for i-FIT = 2

Monoisotopic Mass, Even Electron Ions  
 1030 formula(e) evaluated with 5 results within limits (all results (up to 1000) for each mass)  
 Elements Used:  
 C: 0-70 H: 0-100 N: 0-4 O: 0-15 Na: 0-1  
 ESI (16-800) Mass F B (MPB-033) 100 (3.462)

2 TOF MS ES+  
 4.51e+002

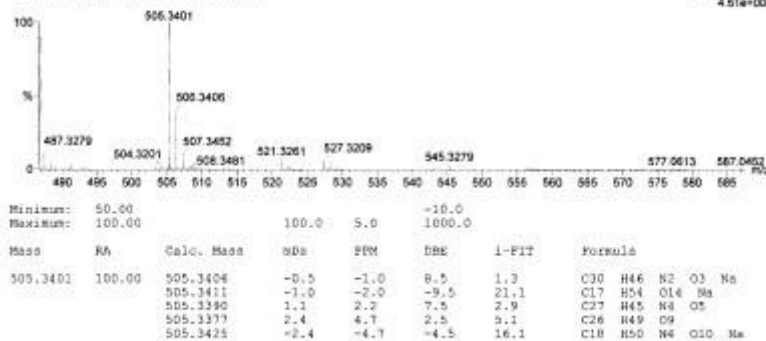

Figure S97. HRMS-ES of 11.

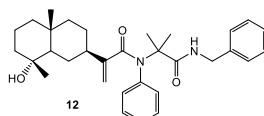

# Elemental Composition Report

Page 1

## Multiple Mass Analysis: 2 mass(es) processed

Tolerance = 5.0 PPM / DBE: min = -10.0, max = 1000.0

Element prediction: Off

Number of isotope peaks used for I-FIT = 2

Monoisotopic Mass, Even Electron Ions

1360 formula(e) evaluated with 5 results within limits (all results (up to 1000) for each mass)

Elements Used:

C: 0-70 H: 0-100 N: 0-2 O: 0-16 Na: 0-1

ESI (16-885) Maria F (MFB-056) 70 (3.051)

1: TOF MS ES+  
4.95e+001

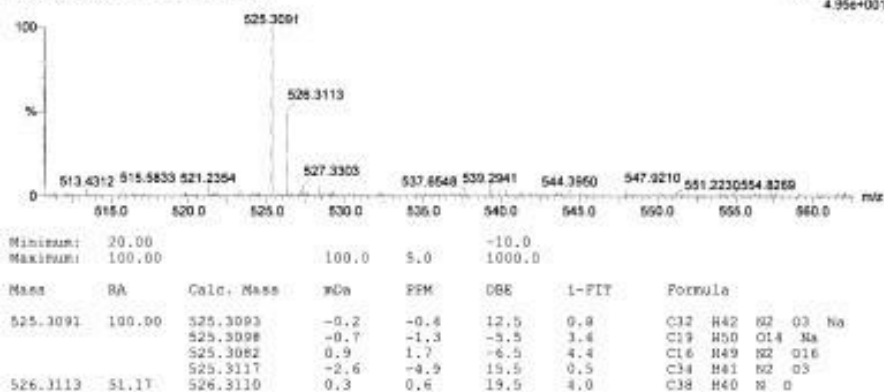

Figure S98. HRMS-ES of 12.

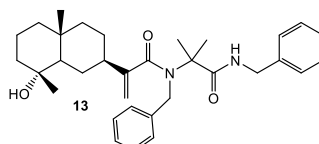

# Elemental Composition Report

Page 1

## Multiple Mass Analysis: 2 mass(es) processed

Tolerance = 5.0 PPM / DBE: min = -10.0, max = 1000.0

Element prediction: Off

Number of isotope peaks used for I-FIT = 2

Monoisotopic Mass, Even Electron Ions

1389 formula(e) evaluated with 7 results within limits (all results (up to 1000) for each mass)

Elements Used:

C: 0-70 H: 0-100 N: 0-2 O: 0-16 Na: 0-1

ESI (16-888) Maria F (MFB-057) 43 (1.898)

1: TOF MS ES+  
5.55e+003

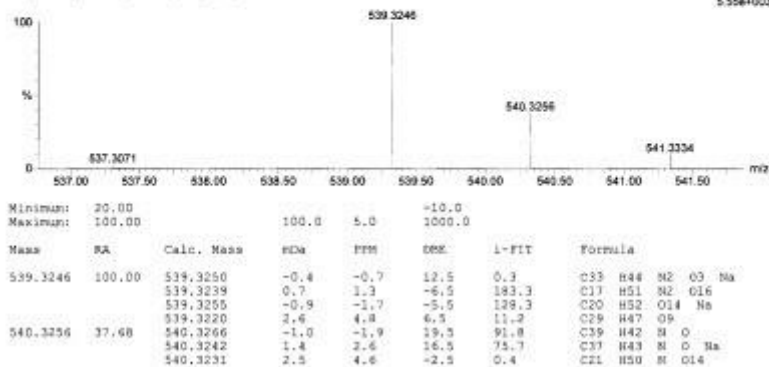

Figure S99. HRMS-ES of 13.

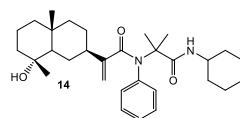

## Elemental Composition Report

Page 1

## Multiple Mass Analysis: 2 mass(es) processed

Tolerance = 5.0 PPM / DBE: min = -10.0, max = 1000.0

Element prediction: Off

Number of isotope peaks used for i-FIT = 2

Monoisotopic Mass, Even Electron Ions

792 formula(e) evaluated with 4 results within limits (all results (up to 1000) for each mass)

Elements Used:

C: 0-120 H: 0-70 N: 0-2 O: 0-10 Na: 0-1

(ESI 17-854) Victor (MFB-062) 1 (0.053)

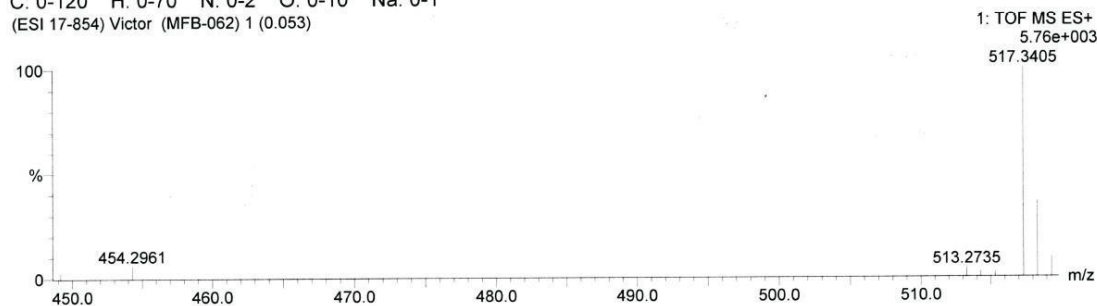

| Minimum: | 20.00  |            |       |      | -10.0  |       |         |     |          |
|----------|--------|------------|-------|------|--------|-------|---------|-----|----------|
| Maximum: | 100.00 |            | 100.0 | 5.0  | 1000.0 |       |         |     |          |
| Mass     | RA     | Calc. Mass | mDa   | PPM  | DBE    | i-FIT | Formula |     |          |
| 517.3405 | 100.00 | 517.3406   | -0.1  | -0.2 | 9.5    | 0.0   | C31     | H46 | N2 O3 Na |
|          |        | 517.3430   | -2.5  | -4.8 | 12.5   | 3.8   | C33     | H45 | N2 O3    |
| 518.3444 | 35.81  | 518.3458   | -1.4  | -2.7 | 4.5    | 10.9  | C28     | H49 | N O6 Na  |
|          |        | 518.3423   | 2.1   | 4.1  | 16.5   | 59.9  | C37     | H44 | N O      |

Figure S100. HRMS-ES of 14.

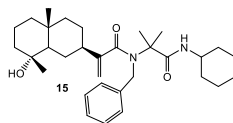

## Elemental Composition Report

Page 1

## Multiple Mass Analysis: 2 mass(es) processed

Tolerance = 5.0 PPM / DBE: min = -10.0, max = 1000.0

Element prediction: Off

Number of isotope peaks used for i-FIT = 2

Monoisotopic Mass, Even Electron Ions

792 formula(e) evaluated with 4 results within limits (all results (up to 1000) for each mass)

Elements Used:

C: 0-120 H: 0-70 N: 0-2 O: 0-10 Na: 0-1

(ESI 17-855) Victor (MFB-063) 52 (1.816)

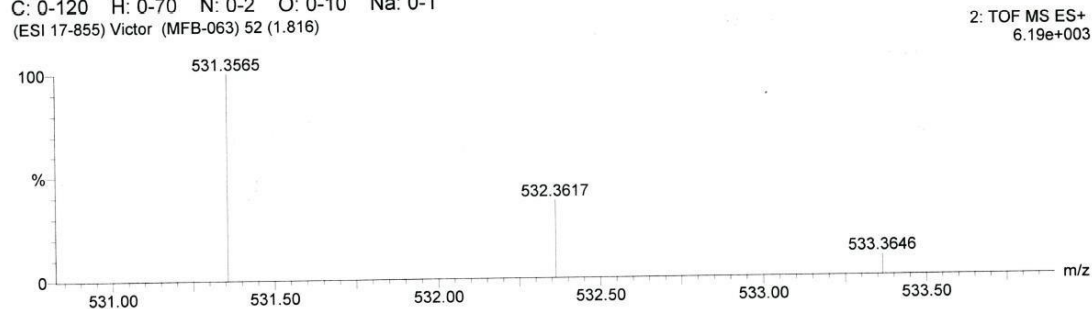

| Minimum: | 20.00  |            |       |      | -10.0  |       |         |     |          |
|----------|--------|------------|-------|------|--------|-------|---------|-----|----------|
| Maximum: | 100.00 |            | 100.0 | 5.0  | 1000.0 |       |         |     |          |
| Mass     | RA     | Calc. Mass | mDa   | PPM  | DBE    | i-FIT | Formula |     |          |
| 531.3565 | 100.00 | 531.3563   | 0.2   | 0.4  | 9.5    | 0.1   | C32     | H48 | N2 O3 Na |
|          |        | 531.3587   | -2.2  | -4.1 | 12.5   | 3.1   | C34     | H47 | N2 O3    |
| 532.3617 | 37.18  | 532.3614   | 0.3   | 0.6  | 4.5    | 18.0  | C29     | H51 | N O6 Na  |
|          |        | 532.3638   | -2.1  | -3.9 | 7.5    | 28.9  | C31     | H50 | N O6     |

Figure S101. HRMS-ES of 15.

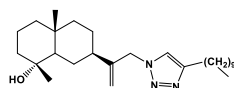

16

## Elemental Composition Report

Page 1

**Multiple Mass Analysis: 304 mass(es) processed - displaying only valid results**

Tolerance = 20.0 PPM / DBE: min = -1.5, max = 50.0

Selected filters: None

Monoisotopic Mass, Odd and Even Electron Ions

4798 formula(e) evaluated with 92 results within limits (all results (up to 1000) for each mass)

Elements Used:

C: 1-27 H: 1-47 N: 0-3 O: 0-1

23-Oct-14-A 118 (3.003) Cn (Cen,2, 50.00, Ht)

Magnet EI+

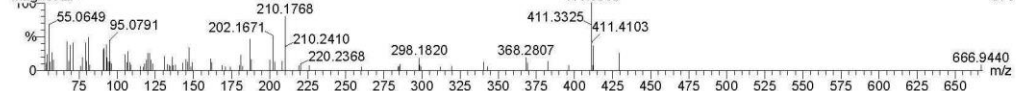

Minimum: 0.10  
Maximum: 100.00

| Mass     | RA     | Calc. Mass | mDa  | PPM   | DBE | i-FIT     | Formula      |
|----------|--------|------------|------|-------|-----|-----------|--------------|
| 429.3716 | 25.06  | 429.3719   | -0.3 | -0.7  | 6.0 | 5546064.0 | C27 H47 N3 O |
| 412.3660 | 36.05  | 412.3692   | -3.2 | -7.8  | 6.5 | 5546084.0 | C27 H46 N3   |
| 412.3305 | 13.25  | 412.3328   | -2.3 | -5.6  | 7.5 | 5546042.5 | C26 H42 N3 O |
| 411.3585 | 100.00 | 411.3613   | -2.8 | -6.8  | 7.0 | 2773105.0 | C27 H45 N3   |
| 411.3325 | 67.87  | 411.3375   | -5.0 | -12.2 | 7.5 | 2773053.5 | C27 H43 N2 O |
|          |        | 411.3250   | 7.5  | 18.2  | 8.0 | 2773050.8 | C26 H41 N3 O |
| 396.3452 | 7.20   | 396.3504   | -5.2 | -13.1 | 7.0 | 5546032.5 | C27 H44 N2   |
|          |        | 396.3379   | 7.3  | 18.4  | 7.5 | 5546032.5 | C26 H42 N3   |

Figure S102. HRMS-ES of 16.

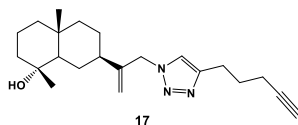

17

## Elemental Composition Report

Page 1

**Multiple Mass Analysis: 560 mass(es) processed - displaying only valid results**

Tolerance = 20.0 PPM / DBE: min = -1.5, max = 50.0

Selected filters: None

Monoisotopic Mass, Odd and Even Electron Ions

8562 formula(e) evaluated with 251 results within limits (all results (up to 1000) for each mass)

Elements Used:

C: 1-23 H: 2-35 N: 0-3 O: 0-1

23-Oct-14-CAFAMMA 82 (2.087)

Magnet EI+

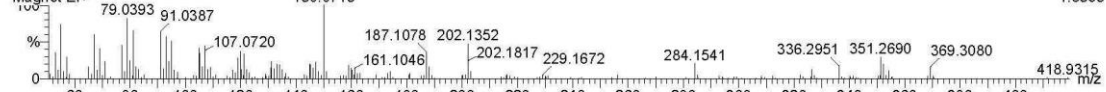

Minimum: 0.10  
Maximum: 100.00

| Mass     | RA    | Calc. Mass | mDa  | PPM   | DBE  | i-FIT     | Formula      |
|----------|-------|------------|------|-------|------|-----------|--------------|
| 369.2774 | 12.50 | 369.2780   | -0.6 | -1.6  | 8.0  | 2773034.8 | C23 H35 N3 O |
| 355.2646 | 1.72  | 355.2624   | 2.2  | 6.2   | 8.0  | 5546033.5 | C22 H33 N3 O |
| 354.2615 | 9.32  | 354.2671   | -5.6 | -15.8 | 8.0  | 2773024.8 | C23 H34 N2 O |
|          |       | 354.2545   | 7.0  | 19.8  | 8.5  | 2773023.5 | C22 H32 N3 O |
| 353.2482 | 4.16  | 353.2467   | 1.5  | 4.2   | 9.0  | 78.6      | C22 H31 N3 O |
| 351.2690 | 29.33 | 351.2674   | 1.6  | 4.6   | 9.0  | 43.4      | C23 H33 N3   |
| 351.2496 | 29.12 | 351.2436   | 6.0  | 17.1  | 9.5  | 44.1      | C23 H31 N2 O |
| 350.2256 | 1.59  | 350.2232   | 2.4  | 6.9   | 10.5 | 401.7     | C22 H28 N3 O |
| 342.2616 | 0.85  | 342.2671   | -5.5 | -16.1 | 7.0  | 5546027.5 | C22 H34 N2 O |
| 341.2777 | 2.61  | 341.2831   | -5.4 | -15.8 | 7.0  | 2773013.3 | C22 H35 N3   |
|          |       | 341.2719   | 5.8  | 17.0  | 7.0  | 2773013.0 | C23 H35 N O  |

Figure S103. HRMS-ES of 17.

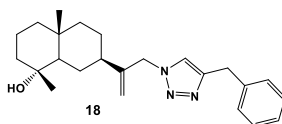

## Elemental Composition Report

Page 1

### Multiple Mass Analysis: 453 mass(es) processed - displaying only valid results

Tolerance = 20.0 PPM / DBE: min = -1.5, max = 50.0

Selected filters: None

Monoisotopic Mass, Odd and Even Electron Ions

6666 formula(e) evaluated with 165 results within limits (all results (up to 1000) for each mass)

Elements Used:

C: 1-24 H: 2-33 N: 0-3 O: 0-1

27-Oct-14-AAFAMMA 123 (3.131)

Magnet EI+ 68.9952

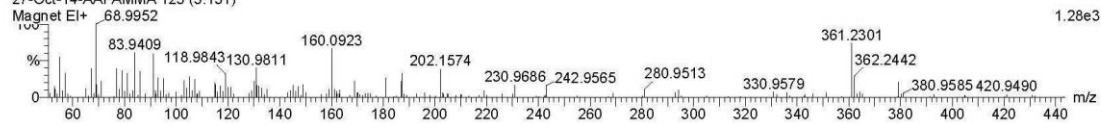

Minimum: 0.10  
Maximum: 100.00

| Mass     | RA    | Calc. Mass | mDa  | PPM   | DBE  | i-FIT     | Formula      |
|----------|-------|------------|------|-------|------|-----------|--------------|
| 379.2619 | 17.70 | 379.2624   | -0.5 | -1.3  | 10.0 | 2773037.5 | C24 H33 N3 O |
| 364.2541 | 1.44  | 364.2515   | 2.6  | 7.1   | 10.0 | 2773040.0 | C24 H32 N2 O |
| 364.1466 | 0.89  | 364.1450   | 1.6  | 4.4   | 17.5 | 2773045.0 | C24 H18 N3 O |
| 363.2478 | 4.71  | 363.2436   | 4.2  | 11.6  | 10.5 | 30.2      | C24 H31 N2 O |
| 363.2277 | 4.16  | 363.2311   | -3.4 | -9.4  | 11.0 | 61.7      | C23 H29 N3 O |
| 362.2208 | 21.02 | 362.2232   | -2.4 | -6.6  | 11.5 | 40.8      | C23 H28 N3 O |
| 361.2301 | 73.59 | 361.2280   | 2.1  | 5.8   | 11.5 | 3.1       | C24 H29 N2 O |
| 351.2405 | 5.52  | 351.2436   | -3.1 | -8.8  | 9.5  | 5546051.5 | C23 H31 N2 O |
| 346.2078 | 2.67  | 346.2045   | 3.3  | 9.5   | 12.0 | 5546035.0 | C23 H26 N2 O |
| 346.1854 | 1.80  | 346.1919   | -6.5 | -18.8 | 12.5 | 5546030.0 | C22 H24 N3 O |

Figure S104. HRMS-ES of 18.

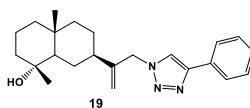

## Elemental Composition Report

Page 1

Tolerance = 5.0 PPM / DBE: min = -10.0, max = 1000.0

Element prediction: Off

Number of isotope peaks used for i-FIT = 2

Monoisotopic Mass, Even Electron Ions

808 formula(e) evaluated with 3 results within limits (all results (up to 1000) for each mass)

Elements Used:

C: 0-70 H: 0-100 N: 0-4 O: 0-15 Na: 0-1

ESI (16-799) Mass F.B. (MFB-TQV) 71 (2.484)

2: TOF MS ES+  
6.77e+001

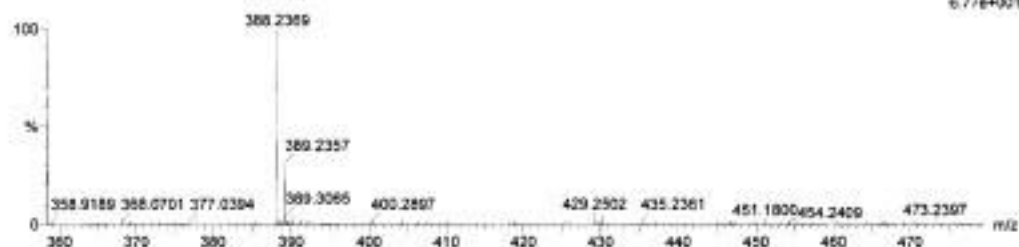

Minimum: 50.00  
Maximum: 100.00

| Mass     | RA     | Calc. Mass | mDa  | PPM  | DBE  | i-FIT | Formula          |
|----------|--------|------------|------|------|------|-------|------------------|
| 388.2369 | 100.00 | 388.2370   | -0.1 | -0.3 | -8.5 | 3.7   | C10 H38 N O12 Na |
|          |        | 388.2365   | 0.4  | 1.0  | 9.5  | 0.2   | C23 H31 N3 O Na  |
|          |        | 388.2358   | 1.5  | 3.9  | -9.5 | 4.8   | C7 H38 N3 O14    |

Figure S105. HRMS-ES of 19.
